# Supplementary material for: A short route for the synthesis of “sweet” macrocycles via a click-dimerization–ring-closing metathesis approach
Source: Royal Society of Chemistry journal article supplement (doi:10.1039/b502682b), 2005-01-01
Supplement: b502682b.pdf [file b502682b.pdf]

## Supporting Information

# **A short route for the synthesis of “sweet” macrocycles via a click dimerization/ring-closing metathesis approach**

Simon Dörner and Bernhard Westermann

*Leibniz Institute of Plant Biochemistry, Department of Bioorganic Chemistry, Weinberg 3, 06120 Halle (Saale), Germany. Fax: +49 345 5582 1309; Tel: +49 345 5582 1340; E-mail: bwesterm@ipb-halle.de*

## Content:

|   |                                                                          |    |
|---|--------------------------------------------------------------------------|----|
| 1 | Experimental data and spectra for dimers 4–6 .....                       | 2  |
| 2 | Experimental data and spectra for bifunctional building blocks 9–13..... | 10 |
| 3 | Experimental data and spectra for dimerized molecules 14–17.....         | 23 |
| 4 | Experimental data and spectra for cyclic molecules 18–25 .....           | 34 |

# 1 Experimental data and spectra for dimers 4–6

11,17-Butane-13,16-diylbis(8-{(2*R*,3*R*,4*S*,5*R*,6*R*)-3,4,5-tris(benzyloxy)-6-[(benzyloxy)-methyl]tetrahydro-2*H*-pyran-2-yl}-1*H*-8,9,10-triazole) (4)

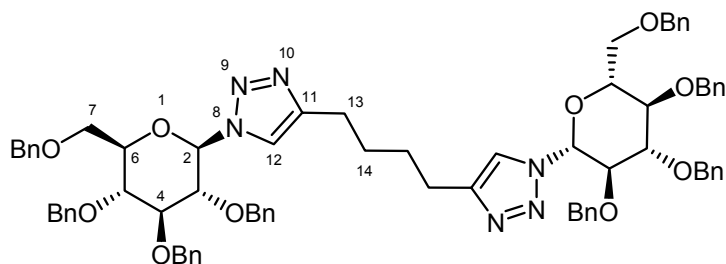

**<sup>1</sup>H-NMR** (400 MHz, CDCl<sub>3</sub>): δ [ppm] = 1.75 (bs, 4H, 10-H), 2.75 (bs, 4H, 9-H), 3.70–3.74 (m, 4H), 3.76–3.86 (m, 4H), 4.00–4.07 (m, 4H), 4.43–4.62 (m, 8H), 4.82–4.96 (m, 6H), 5.52 (d, *J* = 9.0 Hz, 2H, 2-H), 6.90–6.96 (m, 4H), 7.14–7.22 (m, 10H, CH arom.), 7.26–7.36 (m, 30H, CH arom.).–

**<sup>13</sup>C-NMR** (100 MHz, CDCl<sub>3</sub>): δ [ppm] = 25.36, 28.86 (t, C-13, C-14), 68.34 (t, C-7), 73.47, 74.85, 75.18, 75.74 (t, CH<sub>2(Bn)</sub>), 77.23, 77.95, 80.79, 85.44 (d, C-3, C-4, C-5, C-6), 87.38 (d, C-2), 120.20 (d, C-12), 127.68–128.46 (d, CH arom.), 137.00, 137.68, 137.75, 138.14 (s, C arom), 148.05 (s, C-11).–

|                   |                                                                   |                      |       |           |
|-------------------|-------------------------------------------------------------------|----------------------|-------|-----------|
| <b>HRMS (ESI)</b> | C <sub>76</sub> H <sub>80</sub> N <sub>6</sub> O <sub>10</sub> Na | [M+Na <sup>+</sup> ] | calcd | 1259.5828 |
|                   |                                                                   |                      | found | 1259.5798 |

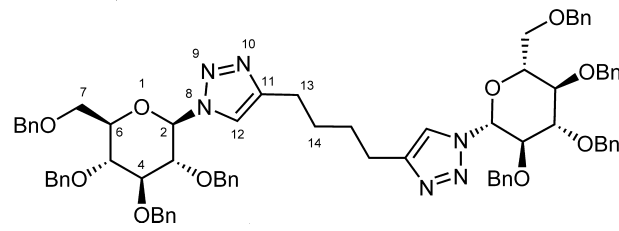

```

dos270.1H.cdc13
Wed Oct 6 13:07 2004
exp3 std1h
SAMPLE
date Oct 6 2004
solvent CDC13
file /export/home/~
nwc/dos/dos270.1H.~
cdc13.fid
ACQUISITION
instrum m400
probe asw5
seqfil s2pul
sfrq 399.937
tn H1
at 2.562
np 65536
sw 12787.7
bs 8
tpwr 58
pw 2.8
d1 1.000
d2 0
tof 828.3
nt 20
ct 20
alock n
gain not used
FLAGS
il n
in nw
dp y
DEC. & VT
dn H1
dfrq 399.936
homo n
dpwr 30
dof 0.0
dm nnn
dmm c
dmf 200
PROCESSING
lb 0.40
wtfile
proc ft
fn 65536
DISPLAY
sp 479.6
wp 2587.0
vs 162
sc 65
wc 225
hzmm 11.50
is 844.16
rf1 3549.8
rfp 0
th 2.1
ins 2.000
rp 2.4
lp -194.5
nm ph

```

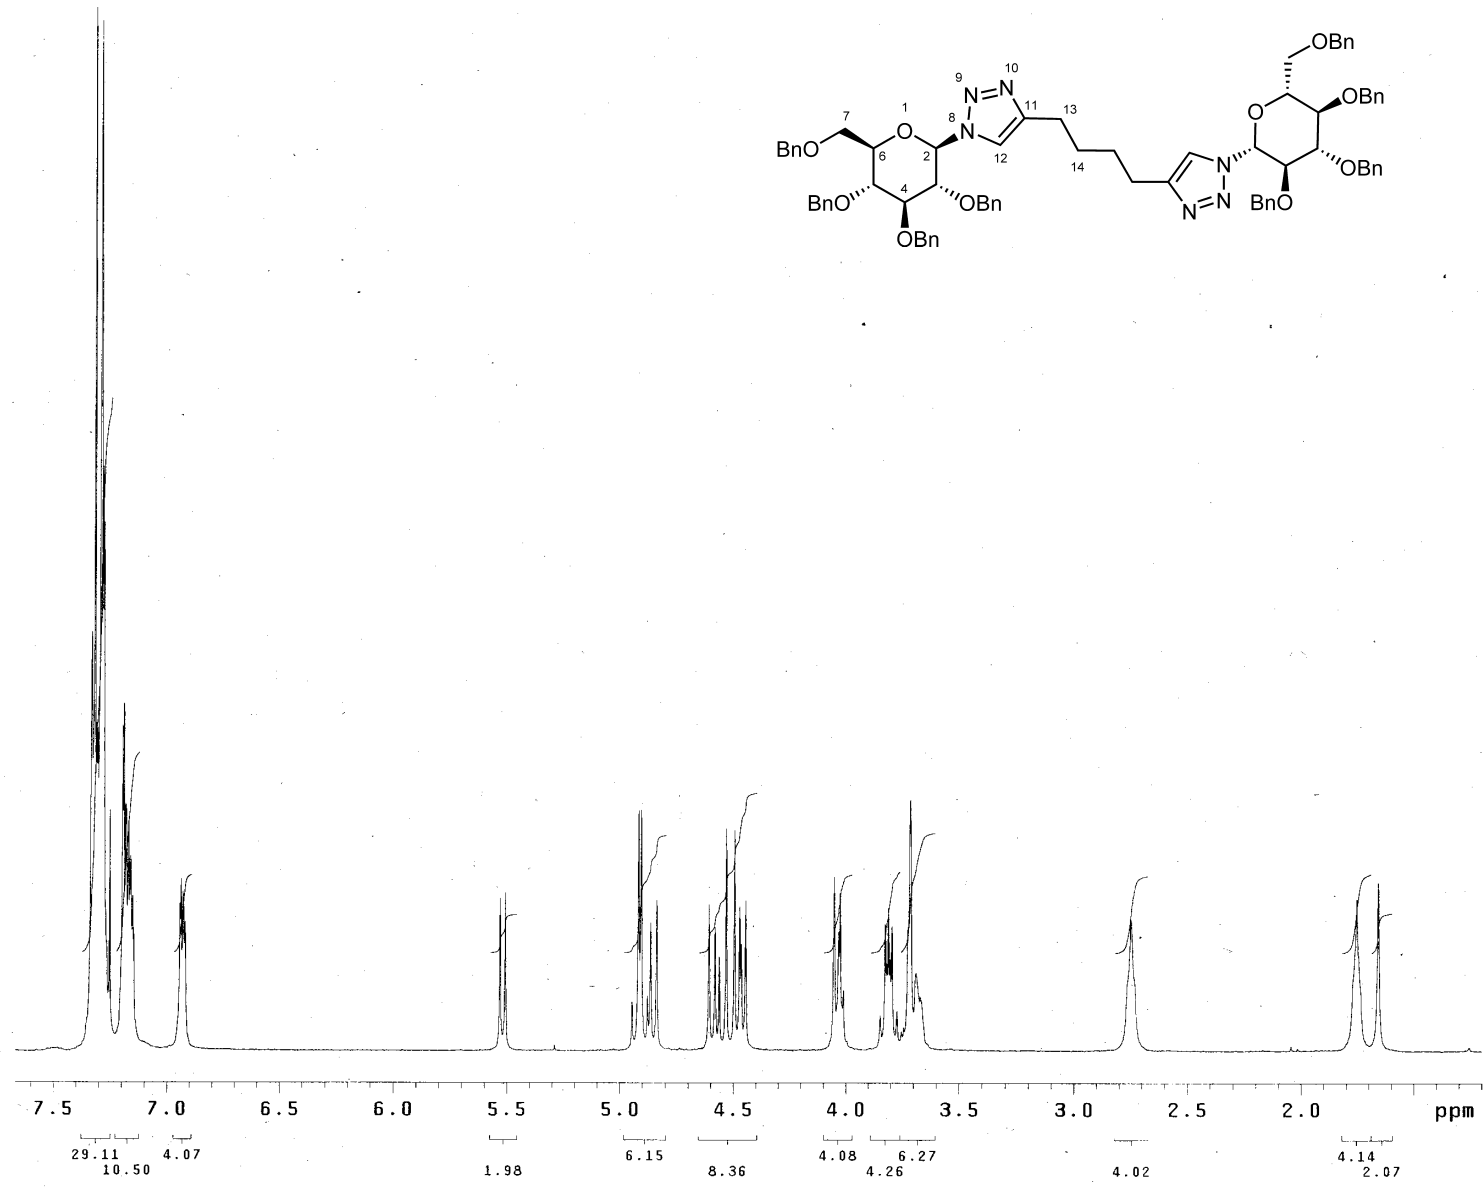

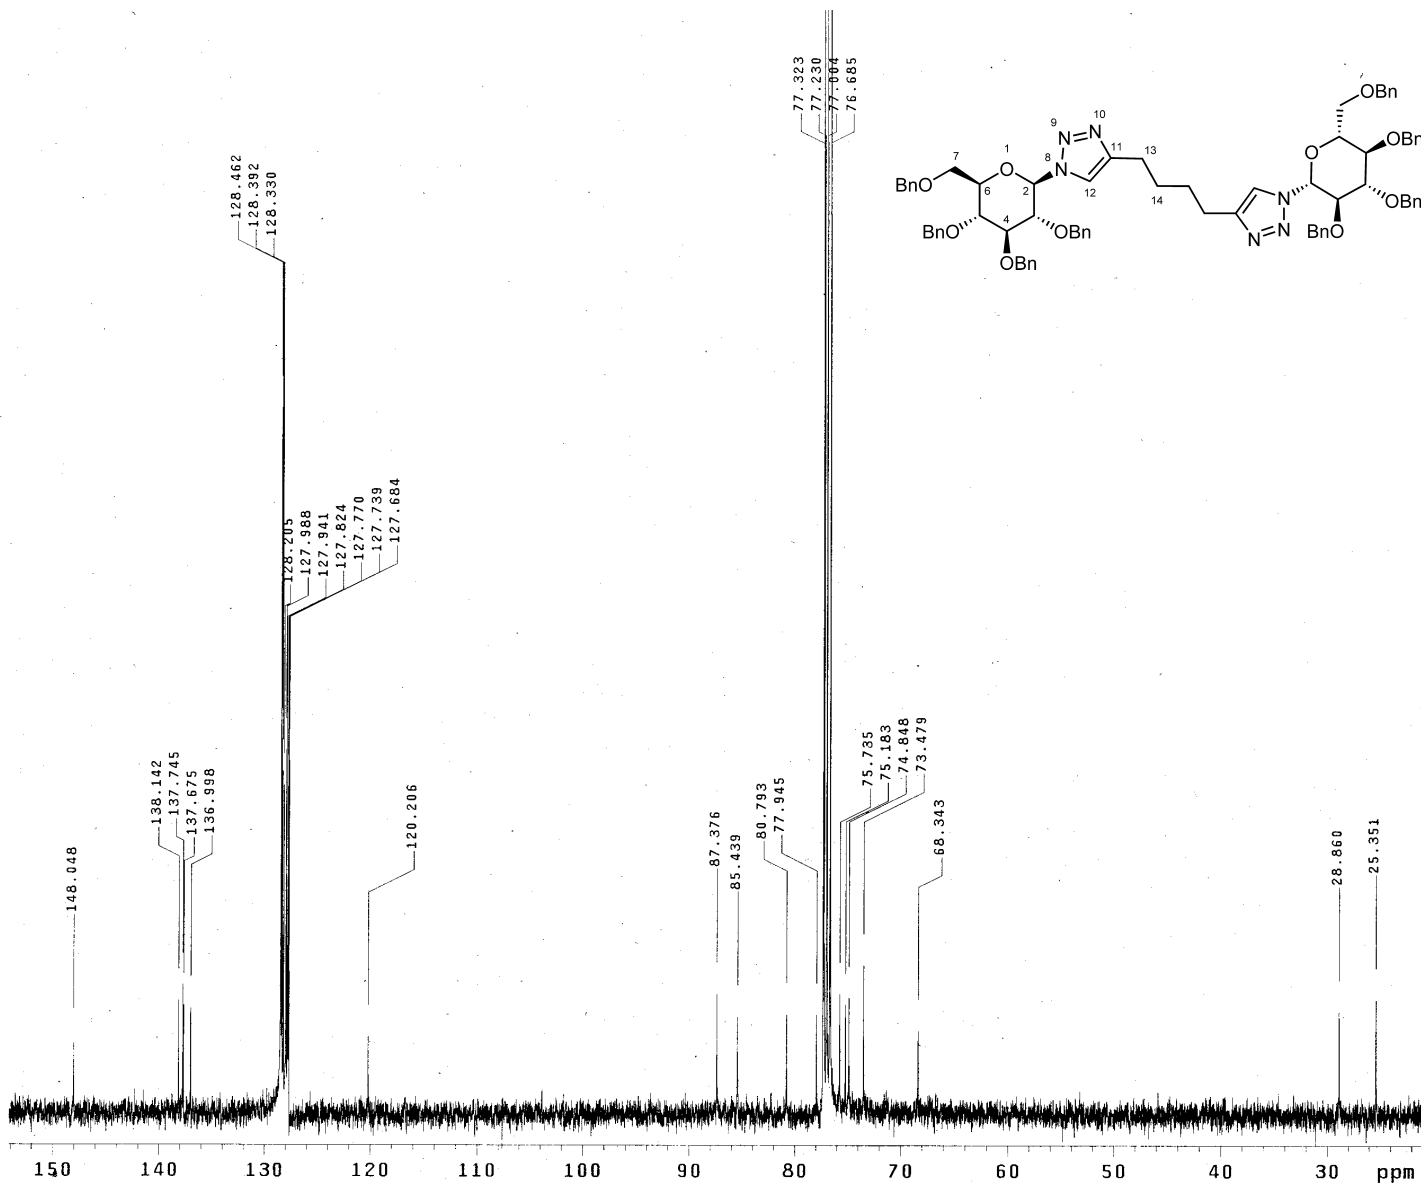

dos270.13C.cdc13  
Wed Oct 6 13:09 2004

exp3 std13c

SAMPLE  
date Oct 6 2004  
solvent CDC13  
file /export/home/~  
nwc/dos/dos270.13C~  
.cdc13.fid

ACQUISITION  
instrum m400  
probe asw5  
seqfil s2pu1  
sfrq 100.574  
tn C13  
at 1.311  
np 67216  
sw 25641.0  
bs 16  
tpwr 61  
pw 4.0  
d1 1.689  
d2 0  
tof 1327.2  
nt 800  
ct 800  
alock n  
gain not used

FLAGS  
f1 n  
f2 n  
dp y

DEC. & VT  
dn H1  
dfrq 399.936  
homo n  
dpwr 40  
dof 0  
dm yyy  
dmm w  
dmf 9350  
pp 17.5

PROCESSING  
lb 1.00  
wtfile ft  
proc ft  
fn 65536

DISPLAY  
sp 2114.3  
wp 13386.7  
vs 338  
sc 65  
vc 225  
hzmm 59.50  
rfl 9742.8  
rfp 7743.4  
th 8.4  
rp 25.3  
lp -276.9  
nm no ph

**Butane-13,16-diylbis{1*H*-8,9,10-triazole-11,17-diyl(2*R*,3*R*,4*R*,5*S*,6*R*)-3-(acetylamino)-6-[(acetyloxy)methyl]tetrahydro-2*H*-pyran-2,4,5-triyl} tetraacetate (5)**

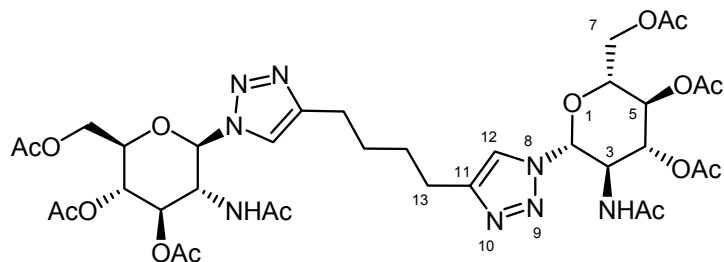

**<sup>1</sup>H-NMR** (400 MHz, DMSO-*d*<sub>6</sub>): δ [ppm] = 1.54 (bs, 6H, CH<sub>3(NHAc)</sub>), 1.56 (bs, 4H, 13-H), 1.92, 1.97, 1.99 (s, 6H, CH<sub>3(Ac)</sub>), 2.60 (bs, 4H, 12-H), 4.00 (dd, *J* = 12.5, 2.3 Hz, 2H, 7<sup>a</sup>-H), 4.12 (dd, *J* = 12.5, 5.1 Hz, 2H, 7<sup>b</sup>-H), 4.20 (ddd, *J* = 10.2, 5.1, 2.3 Hz, 2H, 6-H), 4.55 (ddd, *J* = 9.8, 9.8, 9.4 Hz, 2H, 3-H), 5.05 (dd, *J* = 10.2, 9.8 Hz, 2H, 5-H), 5.32 (dd, *J* = 9.8, 9.8 Hz, 2H, 4-H), 6.02 (d, *J* = 9.8 Hz, 2H, 2-H), 8.02 (s, 2H, 12-H), 8.04 (d, *J* = 9.4 Hz 2H, NH).–

**<sup>13</sup>C-NMR** (100 MHz, DMSO-*d*<sub>6</sub>): δ [ppm] = 20.95, 21.11, 21.20 (q, CH<sub>3(Ac)</sub>), 22.94 (q, CH<sub>3(NHAc)</sub>), 25.31, 28.72 (t, C-13, C-14), 52.73 (d, C-3), 62.49 (t, C-7), 68.71, 73.05, 73.96 (d, C-4, C-5, C-6), 85.28 (d, C-2), 120.61 (d, C-12), 146.94 (s, C-11), 169.40, 169.62, 170.08 (s, CO).–

|                   |                                                                   |                      |       |          |
|-------------------|-------------------------------------------------------------------|----------------------|-------|----------|
| <b>HRMS (ESI)</b> | C <sub>36</sub> H <sub>50</sub> N <sub>8</sub> O <sub>16</sub> Na | [M+Na <sup>+</sup> ] | calcd | 873.3237 |
|                   |                                                                   |                      | found | 873.3235 |

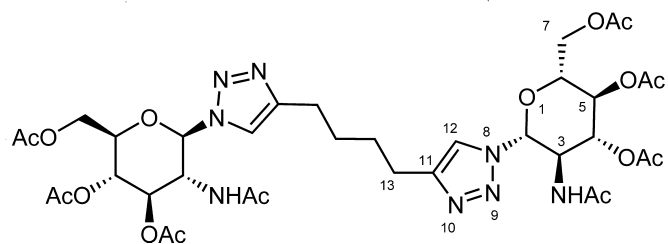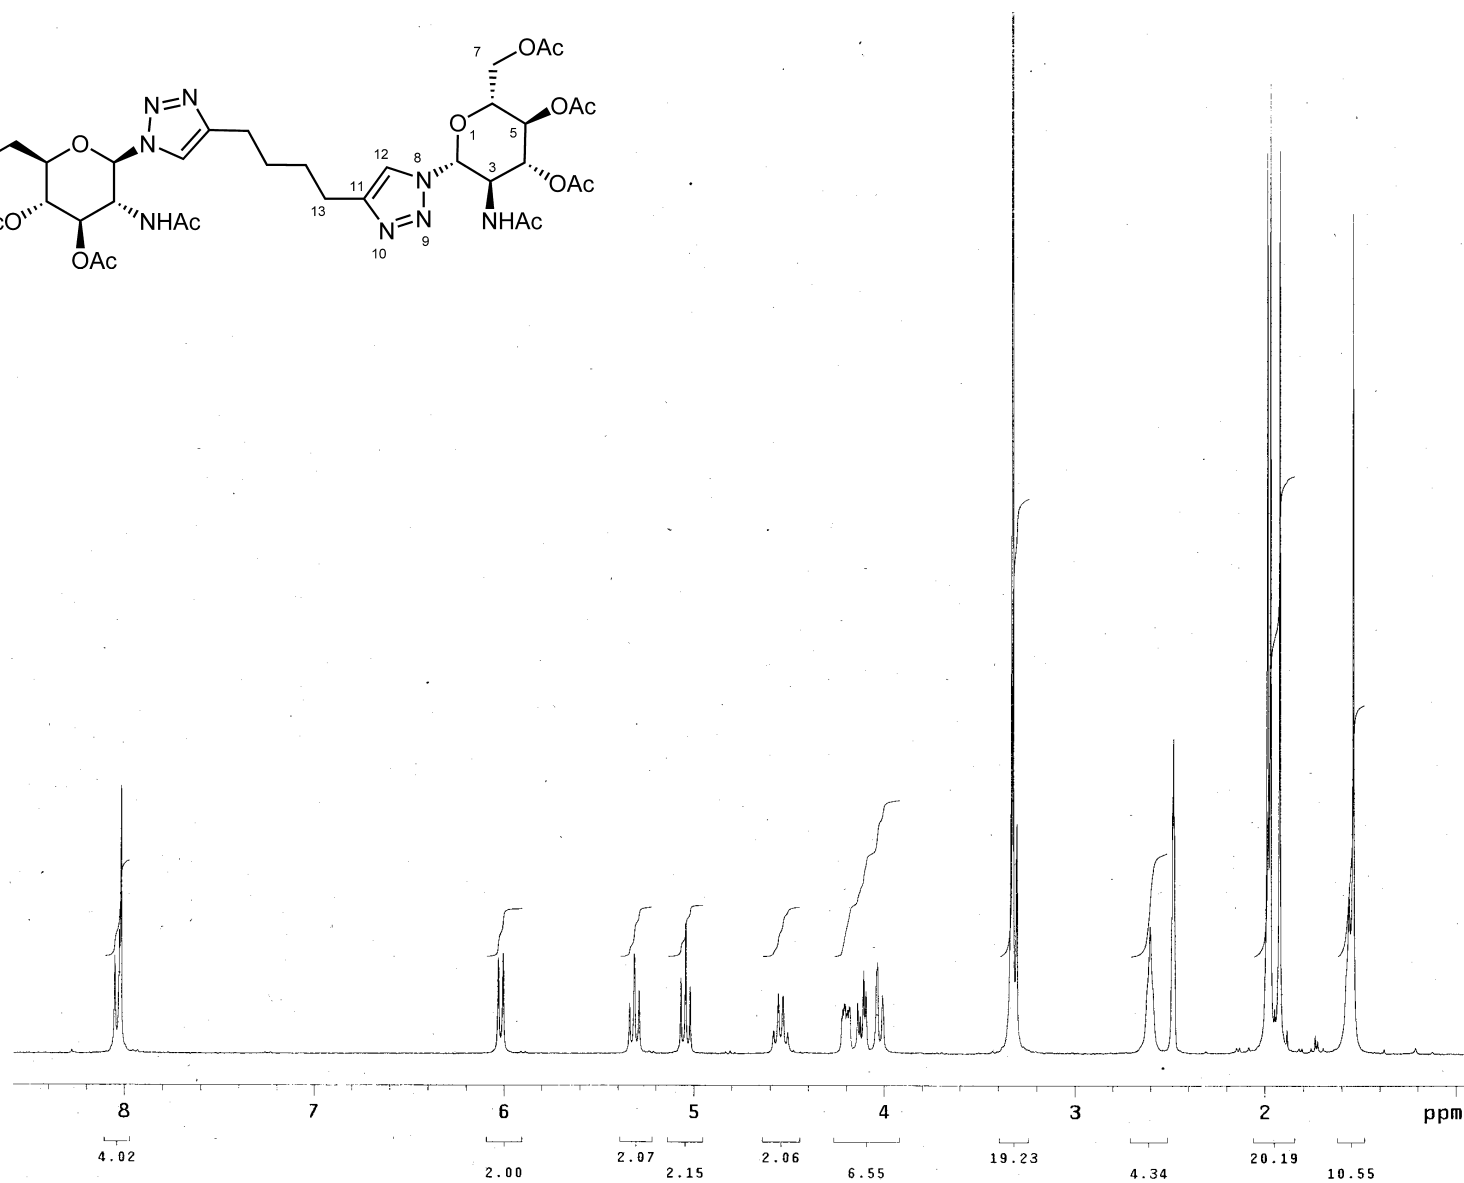

```

dos273.1H.DMSO
Thu Oct 7 09:29 2004
exp3 std1h
SAMPLE
date Oct 7 2004
solvent DMSO
file /export/home/~
nwc/dos/dos273.1H.~
DMSO
ACQUISITION
instrum m400
probe asw5
seqfil s2pul
sfrq 399.939
tn H1
at 2.562
np 65536
sw 12787.7
bs 8
tpwr 58
pw 2.8
d1 1.000
d2 0
tof 828.3
nt 20
ct 20
alock n
gain not used
FLAGS
il n
in nw
dp y
DEC. & VT
dn H1
dfrq 399.938
homo n
dpwr 30
dof 0.0
dm nnn
dmm c
dmf 200
PROCESSING
lb 0.40
wtfile
proc ft
fn 65536
DISPLAY
sp 370.7
wp 3062.8
vs 409
sc 65
wc 225
hzmm 13.61
is 1155.51
rfl 3539.8
rfp 0
rf 2.9
ins 2.000
rp 5.2
lp -195.9
nm ph
  
```

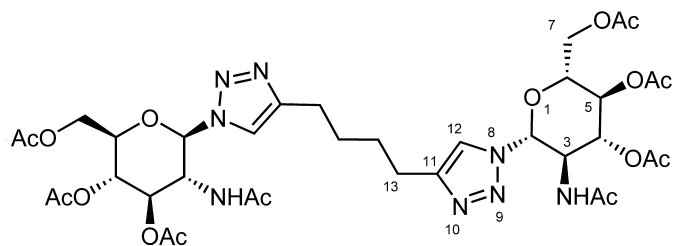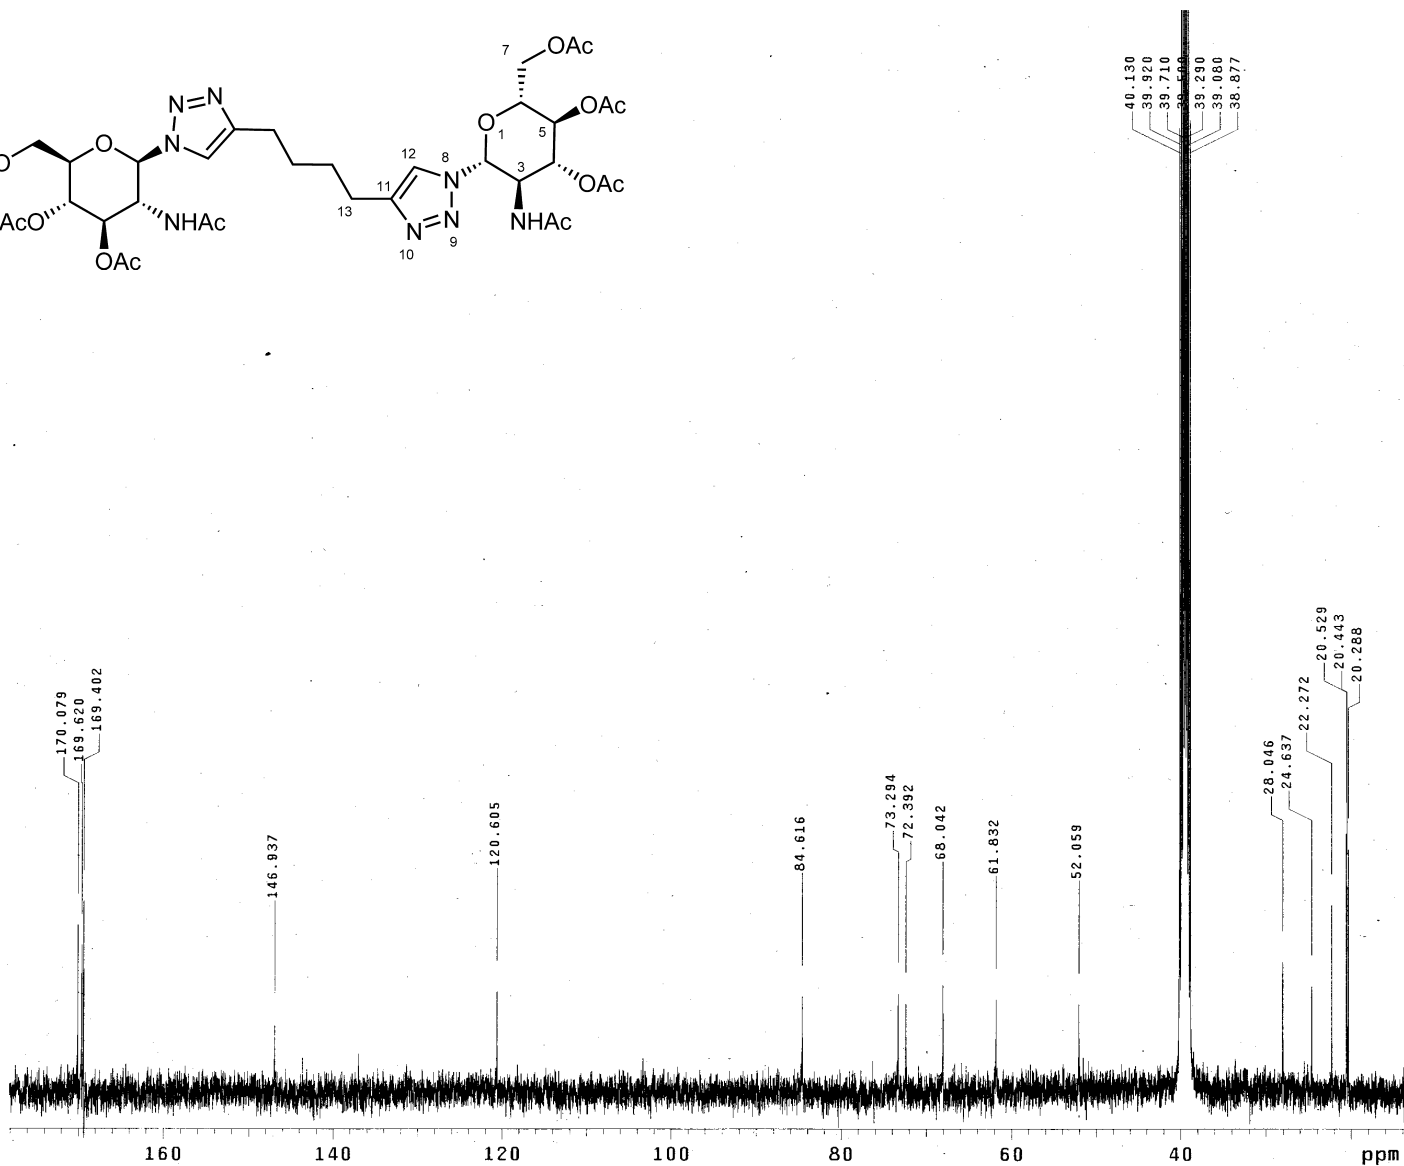

```

dos273.13C.DMSO
Thu Oct 7 09:36 2004
exp3 std13c

SAMPLE
date Oct 7 2004
solvent DMSO
file /export/home/~
nwc/dos/dos273.13C~
DMSO
ACQUISITION
instrum m400
probe asw5
seqfil s2pul
sfrq 100.575
tn C13
at 1.311
np 67216
sw 25641.0
bs 16
tpwr 61
pw 4.0
d1 1.689
d2 0
tof 1327.2
nt 1000
ct 1000
alock n
gain not used
FLAGS
il n
in n
dp y
DEC. & VT
dn H1
dfrq 399.938
homo n
dpwr 40
dof 0
dm yyv
dmm w
dmf 9350
pp 17.5
PROCESSING
lb 1.00
wtfile
proc ft
fn 65536
DISPLAY
sp 1361.0
wp 16547.3
vs 1134
sc 65
wc 225
hzmm 73.54
rfl 6009.8
rfp 3972.3
th 7.3
rp -178.0
lp -270.0
nm ph
  
```



**Butane-13,16-diylbis(1*H*-8,9,10-triazole-11,8-diyl(2*R*,3*R*,4*R*,5*R*,6*R*)-3-[(trifluoroacetyl)-amino]-6-[[trifluoroacetyl]amino]methyl}tetrahydro-2*H*-pyran-2,4,5-triyl) tetraacetate (6)**

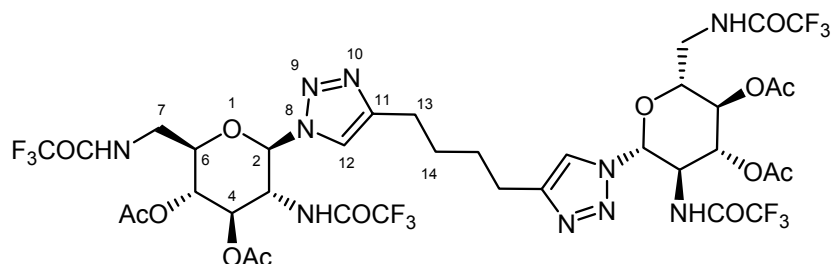

**<sup>1</sup>H-NMR** (500 MHz, DMSO-*d*<sub>6</sub>): δ [ppm] = 1.56 (bs, 4H, 16-H), 1.93, 2.03 (s, 6H, CH<sub>3(Ac)</sub>), 2.61 (bs, 4H, 13-H), 3.40–3.44 (m, 4H, 7-H), 4.13 (ddd, *J* = 10.0, 6.2, 3.3 Hz, 2H, 6-H), 4.84 (ddd, *J* = 10.4, 9.8, 8.8 Hz, 2H, 3-H), 5.11 (dd, *J* = 10.0, 9.5 Hz, 2H, 5-H), 5.38 (dd, *J* = 10.4, 9.5 Hz, 2H, 4-H), 6.07 (d, *J* = 9.8 Hz, 2H, 2-H), 8.11 (s, 2H, 12-H), 9.47 (bt, *J* = 5.5 Hz, 2H, 7-NH) 9.70 (bd, *J* = 8.8 Hz, 2H, 3-NH).

**<sup>13</sup>C-NMR** (125 MHz, DMSO-*d*<sub>6</sub>): δ [ppm] = 20.05, 20.45 (q, CH<sub>3(Ac)</sub>), 24.47 (t, C-13), 27.93 (t, C-14), 40.21 (t, C-7), 52.77 (d, C-3), 68.92 (d, C-5), 71.99 (d, C-4), 73.58 (d, C-6), 84.06 (d, C-2), 115.77 (q, <sup>1</sup>*J*(<sup>13</sup>C, <sup>19</sup>F) = 287.7 Hz, CF<sub>3</sub>), 115.36 (q, <sup>1</sup>*J*(<sup>13</sup>C, <sup>19</sup>F) = 288.2 Hz, CF<sub>3</sub>), 120.68 (d, C-12), 147.26 (s, C-11), 156.33 (q, <sup>2</sup>*J*(<sup>13</sup>C, <sup>19</sup>F) = 37.2 Hz, C(O)CF<sub>3</sub>), 156.70 (q, <sup>2</sup>*J*(<sup>13</sup>C, <sup>19</sup>F) = 36.4 Hz, C(O)CF<sub>3</sub>), 169.41, 169.61 (s, CO).–

|                   |                                                                                                         |       |           |
|-------------------|---------------------------------------------------------------------------------------------------------|-------|-----------|
| <b>HRMS (ESI)</b> | C <sub>36</sub> H <sub>14</sub> F <sub>12</sub> N <sub>10</sub> O <sub>14</sub> Na [M+Na <sup>+</sup> ] | calcd | 1087.2426 |
|                   |                                                                                                         | found | 1087.2440 |

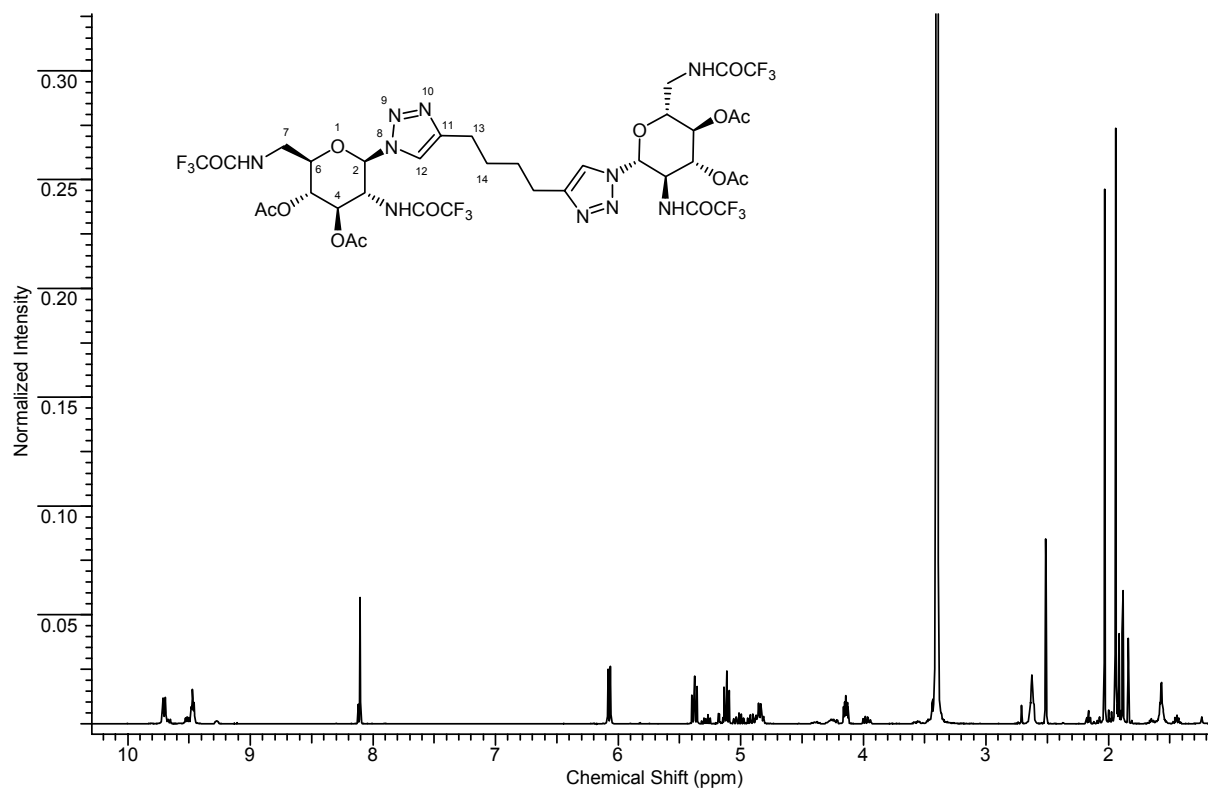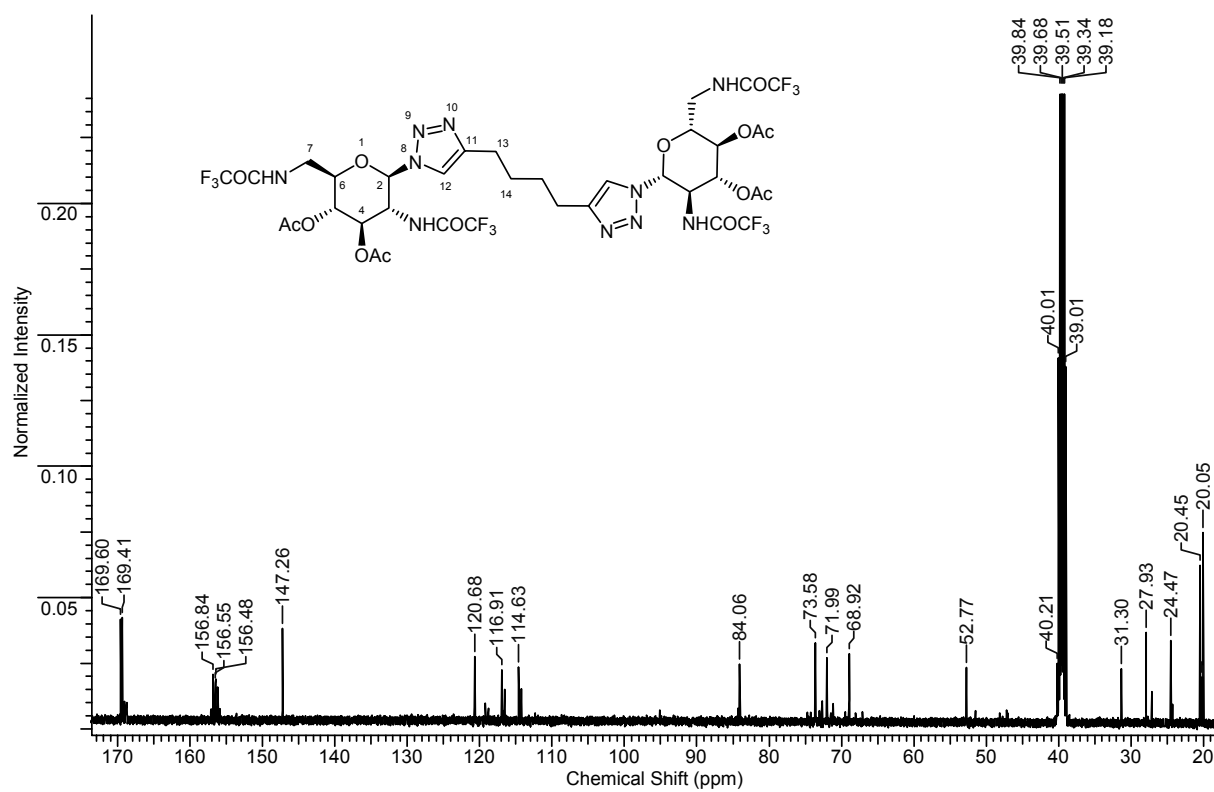

## 2 Experimental data and spectra for bifunctional building blocks 9–13

### Methyl 6-azido-2,3-di-*O*-benzyl-6-deoxy- $\alpha$ -D-glucopyranoside (9)<sup>[1]</sup>

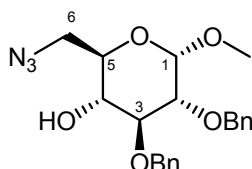

**<sup>1</sup>H-NMR** (400 MHz, CDCl<sub>3</sub>):  $\delta$  [ppm] = 2.15 (bs, 1H, OH), 3.37–3.45 (m, 5H), 3.46–3.51 (m, 1H), 3.53 (dd,  $J$  = 9.4, 3.5 Hz, 1H), 3.70–3.78 (m, 2H), 4.64 (d,  $J$  = 3.5 Hz, 1H), 4.67 (d,  $J$  = 11.3 Hz, 1H), 4.67 (d,  $J$  = 12.1 Hz, 1H), 5.04 4.67 (d,  $J$  = 11.3 Hz, 1H), 4.77 4.67 (d,  $J$  = 12.1 Hz, 1H), 7.28–7.41 (m, 10H, CH arom.)–

**<sup>13</sup>C-NMR** (100 MHz, CDCl<sub>3</sub>):  $\delta$  [ppm] = 51.48 (t, C-6), 55.38, 70.17, 70.55 (d, CH), 73.06, 75.31 (t, CH<sub>2</sub> benzyl.), 79.66, 80.97 (d, CH), 97.94 (d, C-1), 127.82, 127.85, 127.89, 127.92, 128.37, 128.53 (d, CH arom.), 137.66, 138.38 (s, C arom.)–

|                   |                                                                  |                      |       |          |
|-------------------|------------------------------------------------------------------|----------------------|-------|----------|
| <b>HRMS (ESI)</b> | C <sub>21</sub> H <sub>25</sub> N <sub>3</sub> O <sub>5</sub> Na | [M+Na <sup>+</sup> ] | calcd | 422.1686 |
|                   |                                                                  |                      | found | 422.1683 |

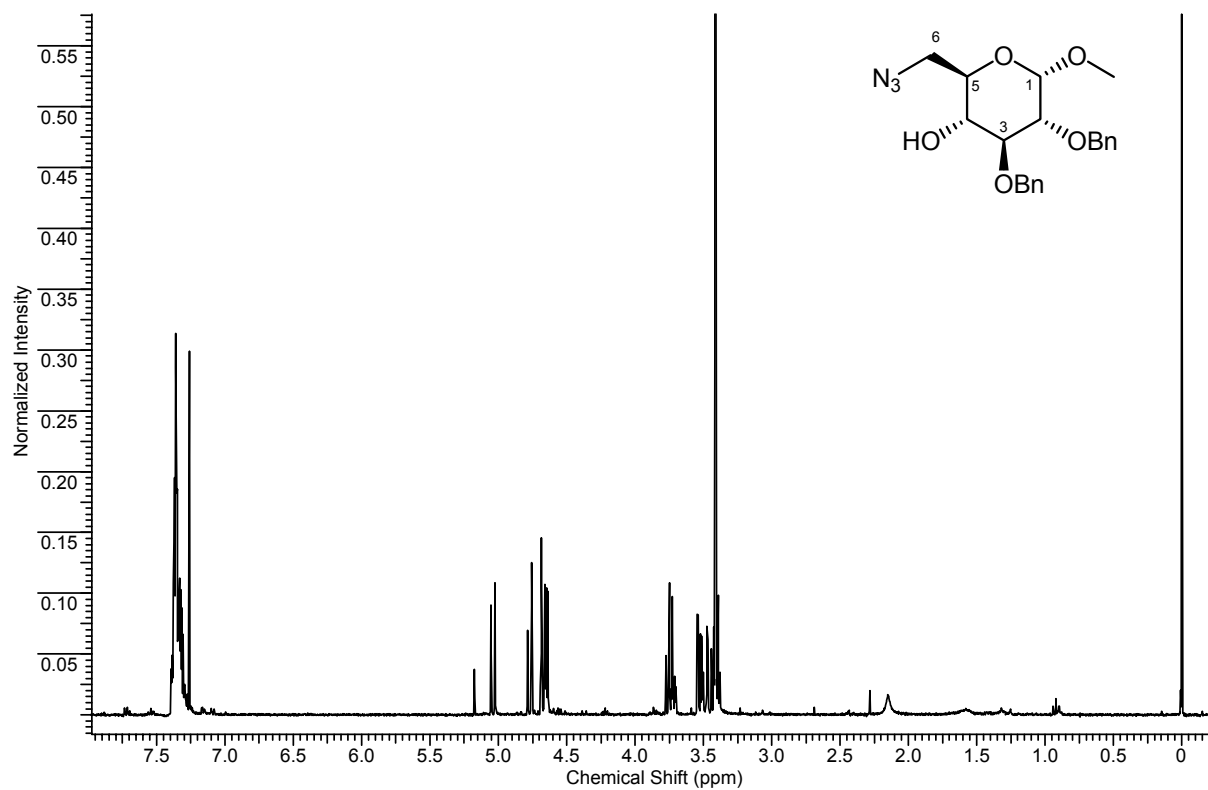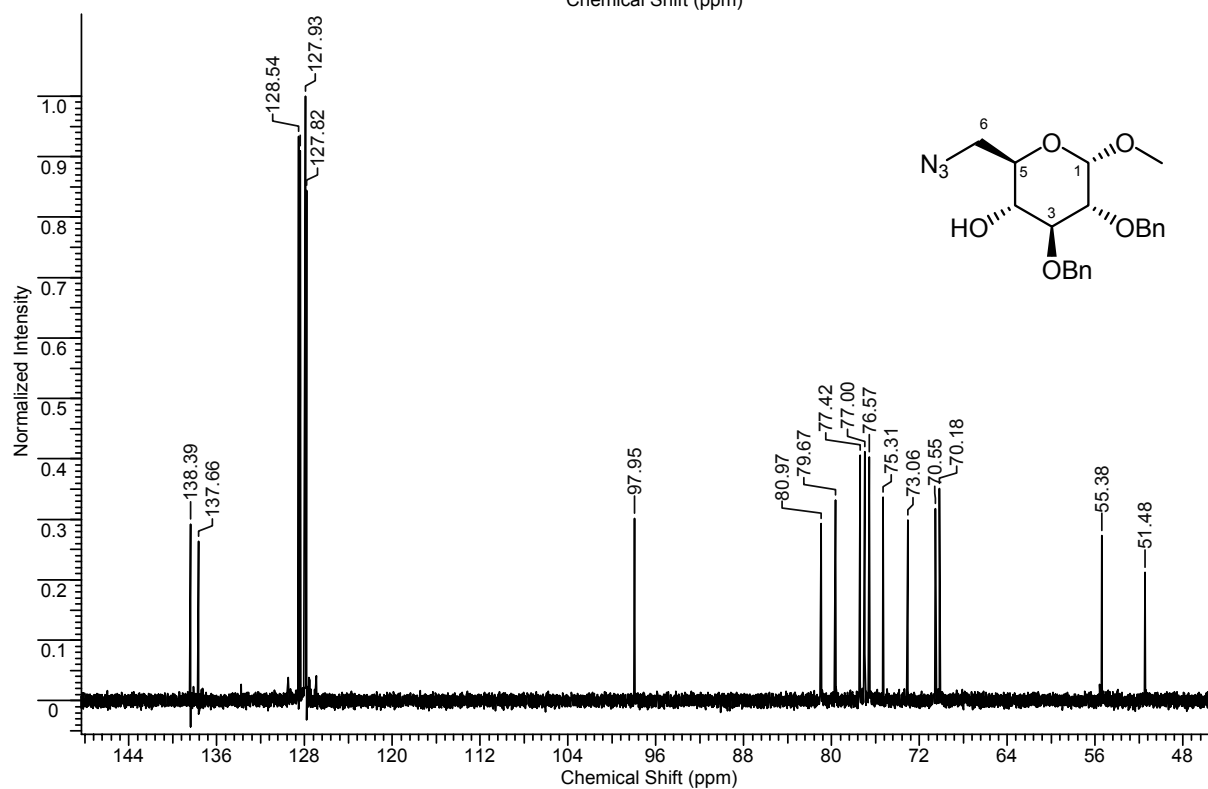

**Allyl 2,3,4-tri-*O*-acetyl-6-azido-6-deoxy- $\beta$ -D-glucopyranoside (10)**

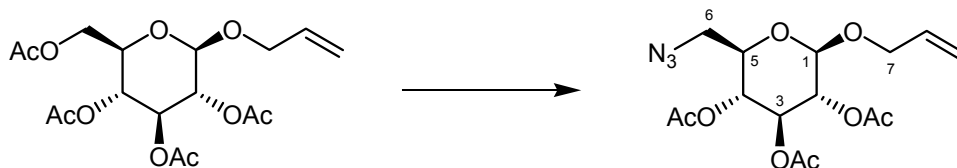

Allyl 2,3,4,6-tetra-*O*-acetyl- $\beta$ -D-glucopyranoside (1.0 g, 2.57 mmol) was dissolved in methanol (20 ml) and treated with a catalytic amount of NaOMe (1 M). The reaction was stirred for 30 min neutralized with Lewatit S1080 resin and filtered. The residue was dried, dissolved in dry pyridine (10 ml) and cooled in an ice bath. Then TsCl (736 mg, 2.57 mmol) was slowly added and the mixture was allowed to stir over night. Acetic anhydride (1.1 ml, 11.6 mmol) was added and the mixture was stirred for 60 min. The solution was diluted with ethyl acetate and extracted with diluted HCl to remove the pyridine. The organic phase was dried and concentrated. The residue was diluted with dry DMF (15 ml) and treated with sodium azide (0.5 g, 7.72 mmol). After heating the reaction mixture for 4 h at 90°C DMF was evaporated and the residue was diluted with ethyl acetate, extracted with water and brine, concentrated and dried. The product was purified by flash chromatography (silica, eluent: hexanes/ethyl acetate = 1/1,  $R_f$ =0.59) to yield 666 mg (1.79 mmol, 70%) of a colourless solid.

**$^1\text{H-NMR}$**  (400 MHz,  $\text{CDCl}_3$ ):  $\delta$  [ppm] = 2.01, 2.04, 2.06 (s, 3H,  $\text{CH}_{3(\text{Ac})}$ ), 3.18 (dd,  $J$  = 13.3, 2.3 Hz, 1H,  $6^{\text{a}}\text{-H}$ ), 3.43 (dd,  $J$  = 13.3, 7.6 Hz, 1H,  $6^{\text{b}}\text{-H}$ ), 3.69 (ddd,  $J$  = 10.0, 7.6, 2.3 Hz, 1H, 5-H), 4.13 (dddd,  $J$  = 13.3, 6.3, 1.4, 1.4 Hz, 1H,  $7^{\text{a}}\text{-H}$ ), 4.37 (dddd,  $J$  = 13.3, 4.9, 1.6, 1.6 Hz, 1H,  $7^{\text{b}}\text{-H}$ ), 4.60 (d,  $J$  = 7.8 Hz, 1H, 1-H), 4.97 (dd,  $J$  = 9.8, 9.4 Hz, 1H, 3-H), 5.03 (dd,  $J$  = 9.8, 7.8 Hz, 1H, 2-H), 5.21 (dd,  $J$  = 9.4, 9.4 Hz, 1H, 4-H), 5.22 (dddd,  $J$  = 10.5, 2.9, 1.4, 1.4 Hz, 1H,  $9^{\text{a}}\text{-H}$ ), 5.30 (dddd,  $J$  = 17.2, 3.3, 1.6, 1.6 Hz, 1H,  $9^{\text{b}}\text{-H}$ ), 5.86 (dddd,  $J$  = 17.2, 10.5, 6.3, 4.9 Hz, 1H, 8-H).–

**$^{13}\text{C-NMR}$**  (100 MHz,  $\text{CDCl}_3$ ):  $\delta$  [ppm] = 20.58, 20.64 (s, 3H,  $\text{CH}_{3(\text{Ac})}$ ), 51.13 (t, C-6), 69.70 (d, CH), 69.85 (t, C-7), 71.22, 72.53, 73.64 (d, CH), 99.25 (d, C-1), 117.82 (t, C-9), 133.10 (d, C-8), 169.30, 169.53, 170.24 (s, CO).–

**HRMS (ESI)**  $\text{C}_{15}\text{H}_{21}\text{N}_3\text{O}_8\text{Na}$   $[\text{M}+\text{Na}^+]$  calcd 394.1221  
found 394.1221

$\text{C}_{15}\text{H}_{21}\text{N}_3\text{O}_8$  (371.34) Calcd C 48.52 H 5.70  
Found C 48.70 H 5.89

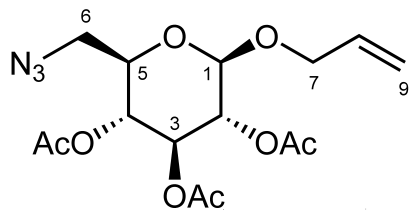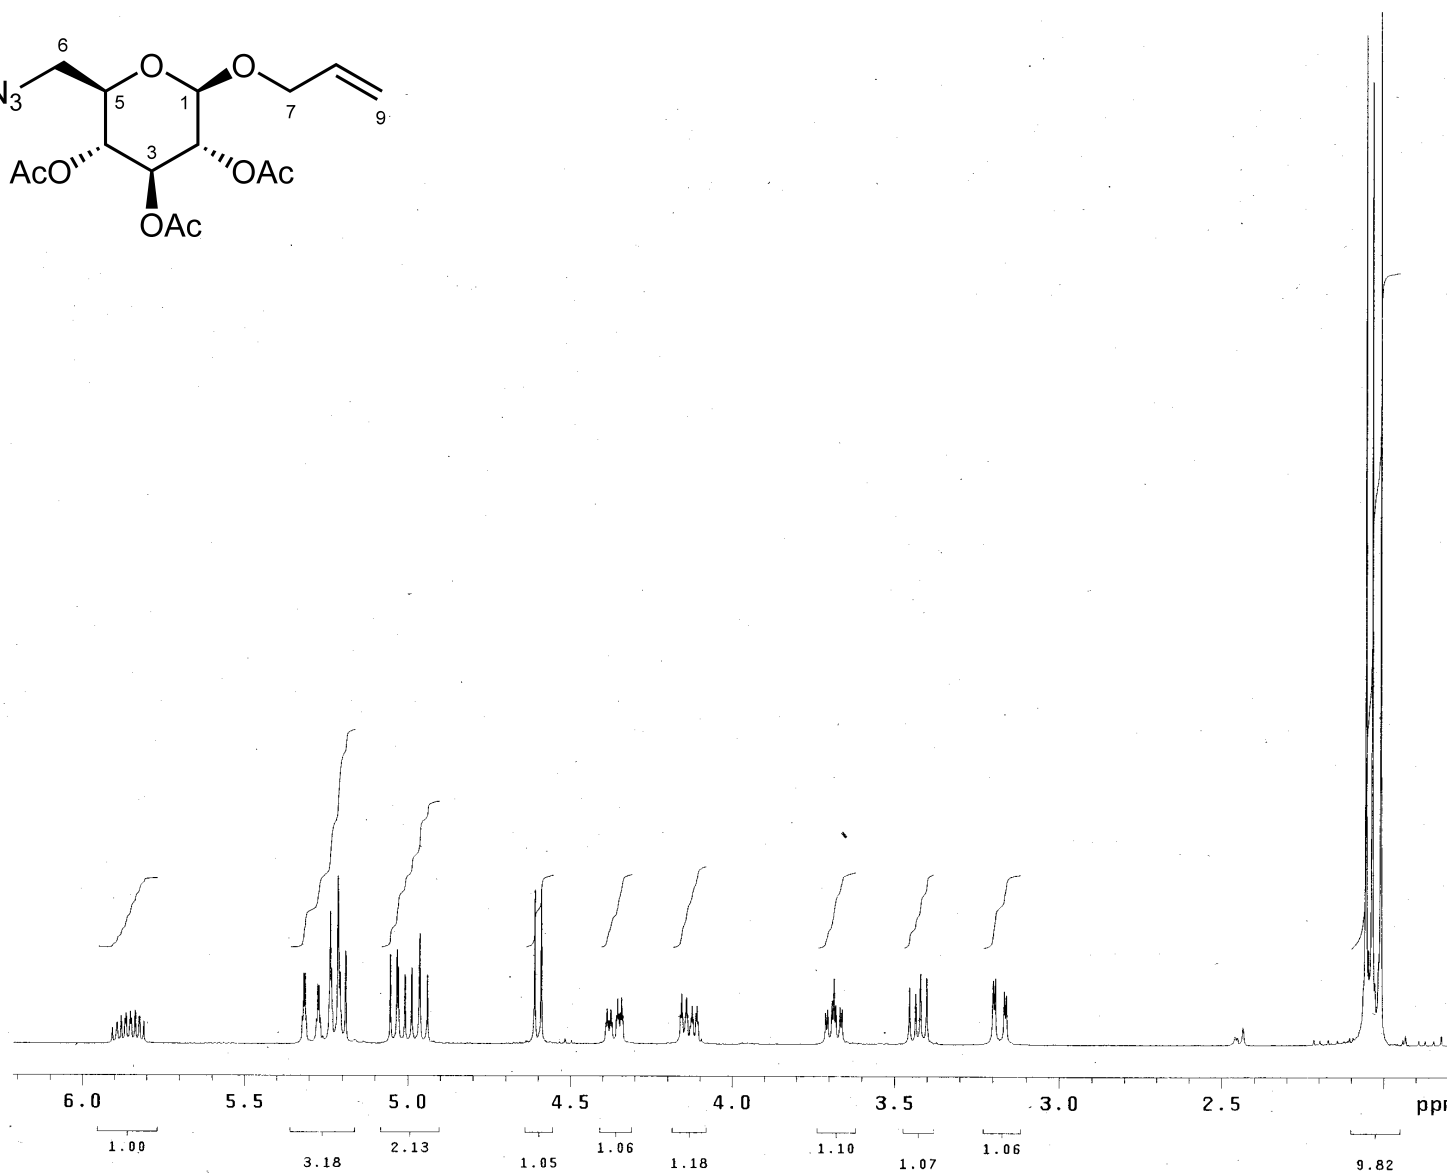

```

dos282.1H.cdc13
Thu Oct 21 16:35 2004
exp3 std1h
SAMPLE
date Oct 21 2004
solvent CDC13
file /export/home/~
nwc/dos/dos282.1H.~
cdc13.fid
ACQUISITION
instrum m400
probe asw5
seqfil s2pul
sfrq 399.937
tn H1
at 2.562
np 65536
sw 12787.7
bs 8
tpwr 58
pw 2.8
d1 1.000
d2 0
tof 828.3
nt 20
ct 20
alock n
gain not used
FLAGS
il n
in nw
dp y
DEC. & VT
dn H1
dfrq 399.936
homo n
dpwr 30
dof 0.0
dm nnn
dmm c
dmf 200
PROCESSING
lb 0.40
wtfile
proc ft
fn 65536
DISPLAY
sp 702.5
wp 1782.7
vs 162
sc 65
wc 225
hzmm 7.92
is 931.96
rfl 3542.8
rfp 0
th 2.1
ins 1.000
rp 4.8
lp -203.1
nm ph

```

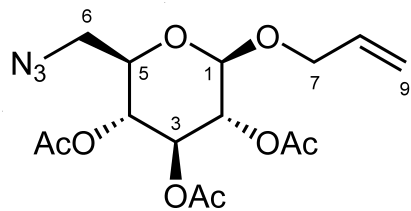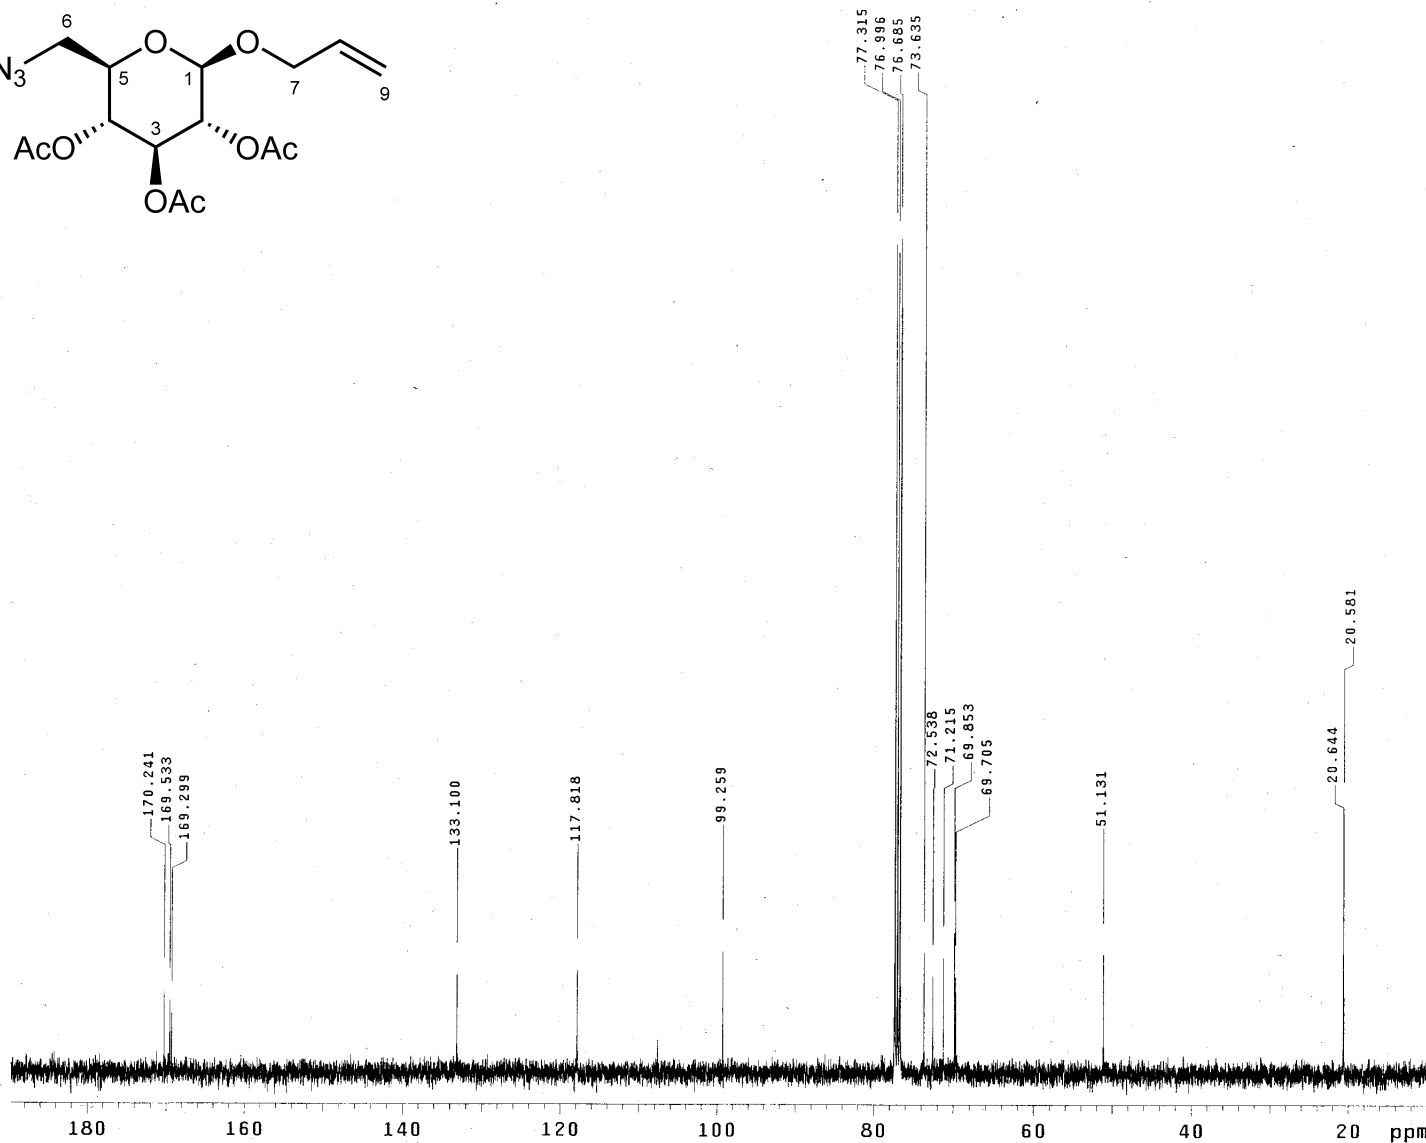

```

dos282.13c.cdc13
Thu Oct 21 16:37 2004

exp3 std13c

SAMPLE
date Oct 21 2004
solvent CDCl3
file /export/home/~
nwc/dos/dos282.13c~
.cdc13.fid
ACQUISITION
instrum m400
probe asw5
seqfil s2pul
sfrq 100.574
tn C13
at 1.311
np 67216
sw 25641.0
bs 16
tpwr 61
pw 4.0
d1 1.689
d2 0
tof 1327.2
nt 1000
ct 192
alock n
gain not used
FLAGS
il n
in n
dp y
DEC. & VT
dn H1
dfrq 399.936
homo n
dpwr 40
dof 0
dm yvy
dmm w
dmf 9350
pp 17.5
PROCESSING
lb 1.00
wtfile
proc ft
fn 65536
DISPLAY
sp 892.8
wp 18186.7
vs 132
sc 65
wc 225
hzmm 80.83
rfl 9742.0
rfp 7743.4
th 7.8
rp 31.6
lp -299.8
nm no ph

```

**3,4-Di-*O*-acetyl-5-(acetylamino)-2,6-anhydro-1-azido-1,5,7,8,9-pentadeoxy-D-*glycero*-L-*gulo*-non-8-enitol (11)**

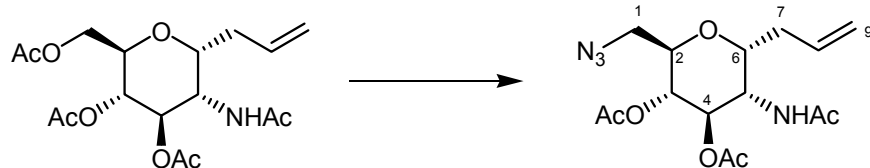

The product was prepared in analogy to (10).

**<sup>1</sup>H-NMR** (400 MHz, CDCl<sub>3</sub>): δ [ppm] = 1.96 (s, 3H, CH<sub>3</sub>(NHAc)), 2.08, 2.09 (s, 3H, CH<sub>3</sub>(Ac)), 2.29–2.37 (m, 1H, 7<sup>a</sup>-H), 2.43–2.52 (m, 1H, 7<sup>b</sup>-H), 3.22 (dd, *J* = 13.4, 3.5 Hz, 1H, 1<sup>a</sup>-H), 3.44 (dd, *J* = 13.4, 7.6 Hz, 1H, 1<sup>b</sup>-H), 3.84 (ddd, *J* = 7.6, 7.6, 3.5 Hz, 1H, 2-H), 4.23–4.33 (m, 2H, 5-H, 6-H), 4.92 (dd, *J* = 7.6, 7.6 Hz, 1H, 3-H), 5.08 (dd, *J* = 8.6, 7.6 Hz, 1H, 3-H), 5.13–5.21 (m, 2H, 9-H), 5.75–5.86 (m, 1H, 8-H), 5.90 (bd, *J* = 8.2 Hz, 1H, NH).–

**<sup>13</sup>C-NMR** (100 MHz, CDCl<sub>3</sub>): δ [ppm] = 20.73, 20.83 (q, CH<sub>3</sub>(Ac)), 23.17 (q, CH<sub>3</sub>(NHAc)), 31.62 (t, C-7), 50.59 (t, C-1), 50.91 (d, C-5), 69.00, 70.14, 71.22, 71.39 (d, C-2, C-3, C-4, C-6), 117.92 (t, C-9), 132.97 (d, C-8), 169.16, 169.81, 171.30 (s, CO).–

|                   |                                                                  |                      |       |          |
|-------------------|------------------------------------------------------------------|----------------------|-------|----------|
| <b>HRMS (ESI)</b> | C <sub>15</sub> H <sub>22</sub> N <sub>4</sub> O <sub>6</sub> Na | [M+Na <sup>+</sup> ] | calcd | 377.1432 |
|                   |                                                                  |                      | found | 377.1433 |



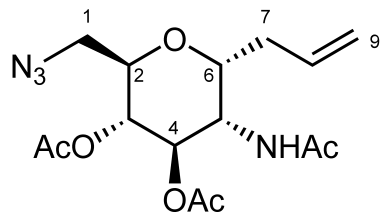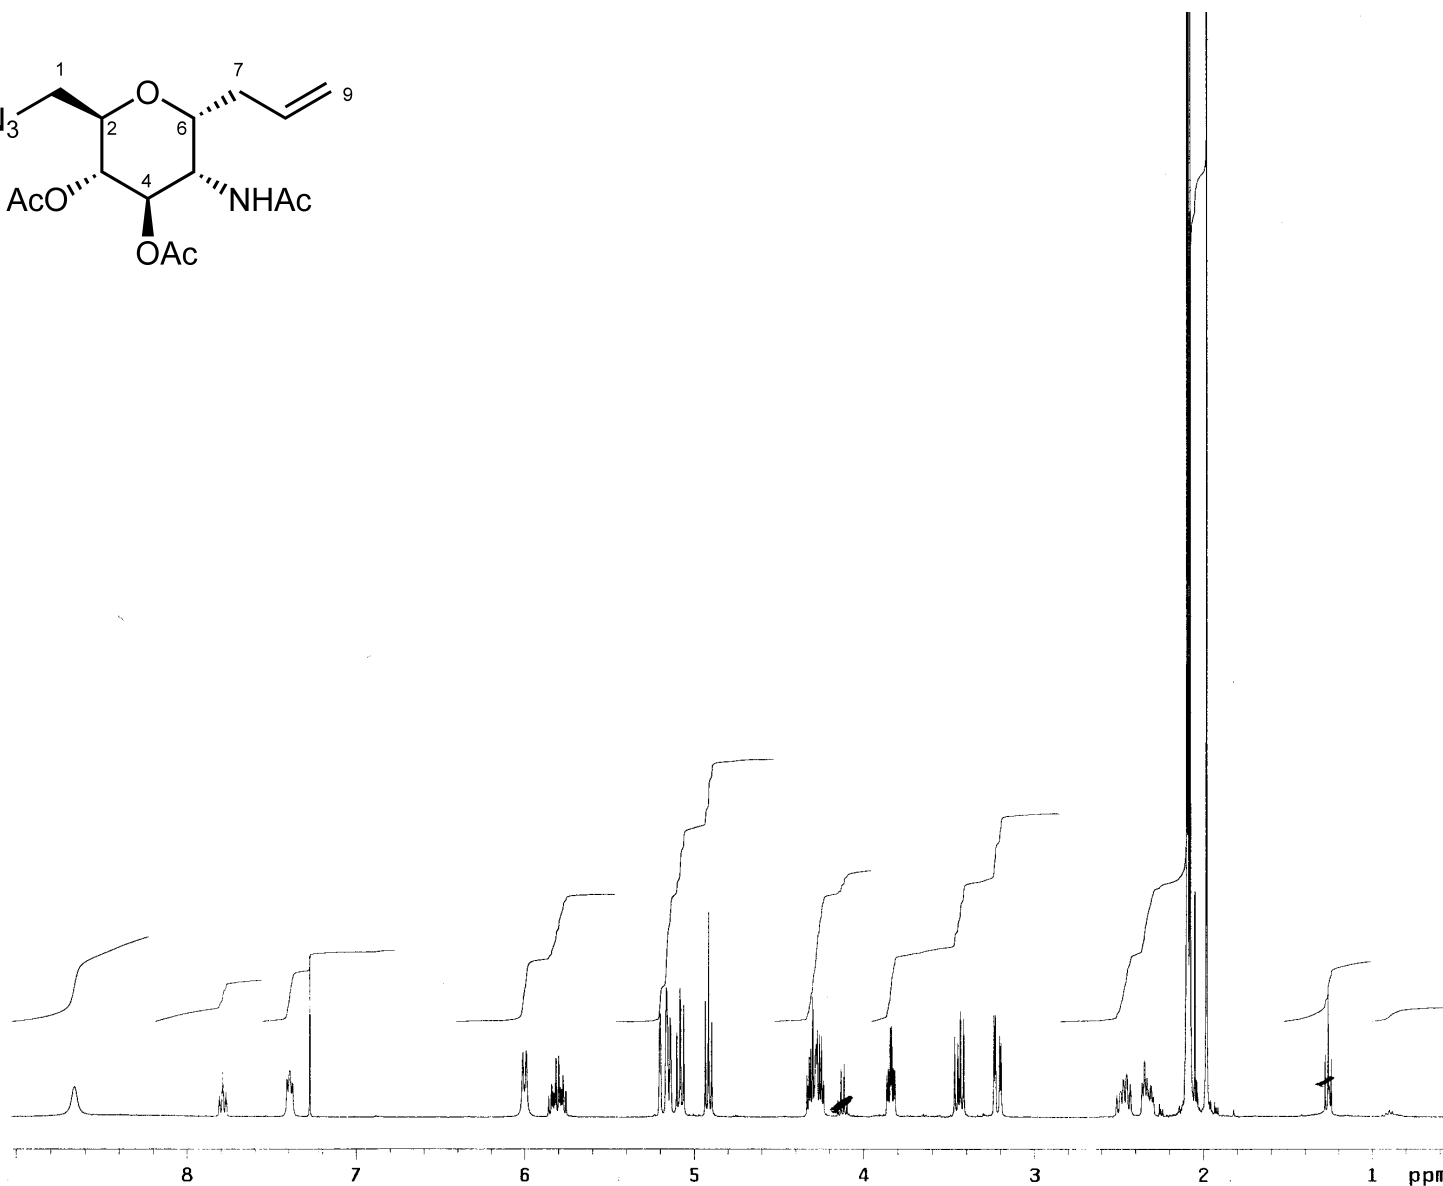

```

dos305.1H.cdc13
Mon Nov 29 09:27 2004
exp7 std1h
SAMPLE
date Nov 29 2004
solvent CDC13
file exp
ACQUISITION
instrum m400
probe asw5
seqfil s2pul
sfrq 399.937
tn H1
at 2.562
np 65536
sw 12787.7
bs 8
tpwr 58
pw 2.8
d1 1.000
d2 0
tof 828.3
nt 16
ct 16
alock n
gain not used
FLAGS
fl n
fn nw
dp y
DEC. & VT
dn H1
dfrq 399.936
homo n
dpwr 30
dof 0.0
dm nnn
dmm c
dmf 200
PROCESSING
lb 0.40
wtfile
proc ft
fn 65536
DISPLAY
sp 205.3
wp 3405.0
vs 377
sc 65
wc 225
hzmm 15.13
ls 1203.57
rfl 3540.8
rfp 0
th 2.9
ins 100.000
rp 3.4
lp -183.8
nm ph

```

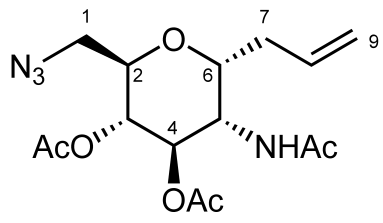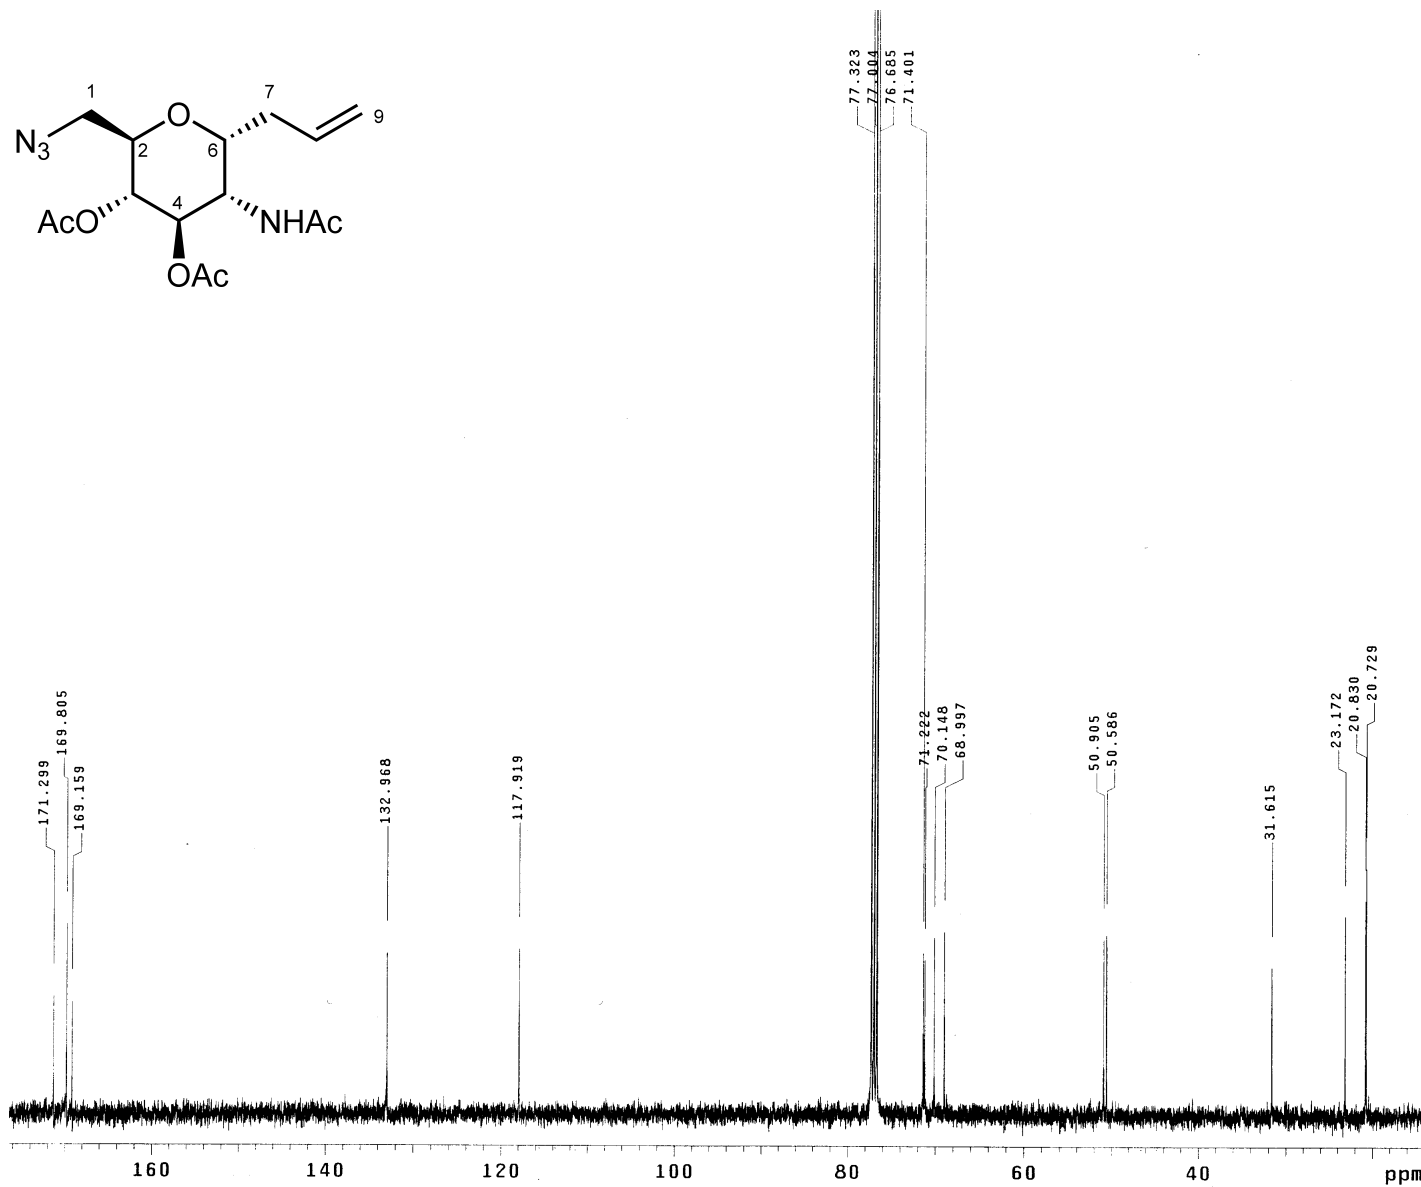

dos305.nFiltr.13C.cd13  
 Mon Nov 29 11:18 2004

exp2 std13c

SAMPLE  
 date Nov 29 2004  
 solvent CDC13  
 file exp  
 ACQUISITION  
 instrum m400  
 probe asw5  
 seqfil s2pu1  
 sfrq 100.574  
 tn C13  
 at 1.311  
 np 67216  
 sw 25641.0  
 bs 16  
 tpwr 61  
 pw 4.0  
 d1 1.689  
 d2 0  
 tof 1327.2  
 nt 800  
 ct 800  
 alock n  
 gain not used  
 FLAGS  
 il n  
 in n  
 dp y  
 DEC. & VT  
 dn H1  
 dfrq 399.936  
 homo n  
 dpwr 40  
 dof 0  
 dm yyy  
 dmm w  
 dmf 9350  
 pp 17.5  
 PROCESSING  
 lb 1.00  
 wtfile ft  
 proc  
 fn 65536  
 DISPLAY  
 sp 1340.4  
 wp 16397.8  
 vs 269  
 sc 65  
 wc 225  
 hzmm 72.88  
 rfl 9742.1  
 rfp 7743.4  
 th 11.5  
 rp 27.4  
 lp -264.7  
 nm no ph

**Methyl 6-azido-2,3-di-*O*-benzyl-6-deoxy-4-*O*-hex-11-ene-7-yl- $\alpha$ -D-glucopyranoside (12)**

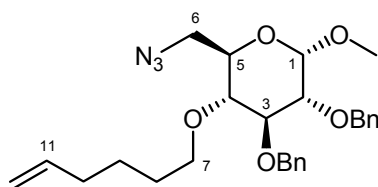

Methyl 6-azido-2,3-di-*O*-benzyl-6-deoxy- $\alpha$ -D-glucopyranoside (1.0 g, 2.50 mmol) was dissolved in dry THF and treated with NaH (150 mg, 3.76 mmol). 6-Bromo-1-hexene (0.39 ml, 2.88 mmol) was added dropwise and the mixture was refluxed for 3 h. Excess NaH was quenched by adding methanol and the solution was diluted with water, extracted with ethyl acetate, dried and concentrated. The product was purified by flash chromatography (silica, eluent: hexanes/ethyl acetate = 4/1,  $R_f$ =0.43) to yield 521 mg (1.10 mmol, 43%) of (12).

**$^1\text{H-NMR}$**  (400 MHz,  $\text{CDCl}_3$ ):  $\delta$  [ppm] = 1.34–1.43 (m, 2H), 1.48–1.58 (m, 2H), 2.03 (q,  $J$  = 7.0 Hz, 2H), 3.22 (dd,  $J$  = 9.8, 9.4 Hz, 1H), 3.40 (s, 3H,  $\text{OCH}_3$ ), 3.45–3.51 (m, 3H), 3.72 (ddd,  $J$  = 9.9, 5.6, 2.5 Hz, 1H, 5-H), 3.80–3.90 (m, 2H), 4.59 (d,  $J$  = 3.5 Hz, 1H), 4.64 (d,  $J$  = 12.1 Hz, 1H), 4.77 (d,  $J$  = 10.9 Hz, 1H), 4.78 (d,  $J$  = 12.1 Hz, 1H), 4.94 (d,  $J$  = 10.9 Hz, 1H), 5.72–5.82 (m, 1H, 11-H), 7.26–7.37 (m, 10H, CH arom.).–

**$^{13}\text{C-NMR}$**  (100 MHz,  $\text{CDCl}_3$ ):  $\delta$  [ppm] = 25.46, 29.83, 33.56 (t, C-8, C-9, C-10), 51.41 (t, C-6), 55.31, 70.04 (d, CH), 73.17, 73.38, 75.63 (t, C-7,  $\text{CH}_2$  benzyl.) 78.68, 79.72, 81.62 (d, CH), 97.97 (d, C-1), 114.55 (t, C-12). 127.49–128.33 (d, CH arom.), 137.88, 138.36 (s, C arom.), 138.49 (d, C-11).–

|                   |                                                           |                          |       |          |
|-------------------|-----------------------------------------------------------|--------------------------|-------|----------|
| <b>HRMS (ESI)</b> | $\text{C}_{27}\text{H}_{35}\text{N}_3\text{O}_5\text{Na}$ | $[\text{M}+\text{Na}^+]$ | calcd | 504.2469 |
|                   |                                                           |                          | found | 504.2464 |

|                                                           |       |         |        |        |
|-----------------------------------------------------------|-------|---------|--------|--------|
| $\text{C}_{27}\text{H}_{35}\text{N}_3\text{O}_5$ (481.58) | Calcd | C 67.34 | H 7.33 | N 8.73 |
|                                                           | Found | C 67.53 | H 7.40 | N 8.34 |

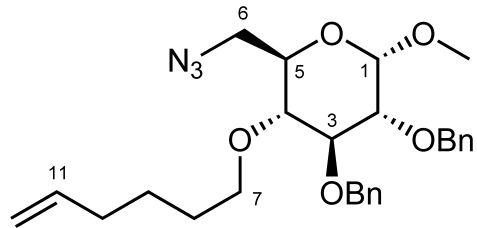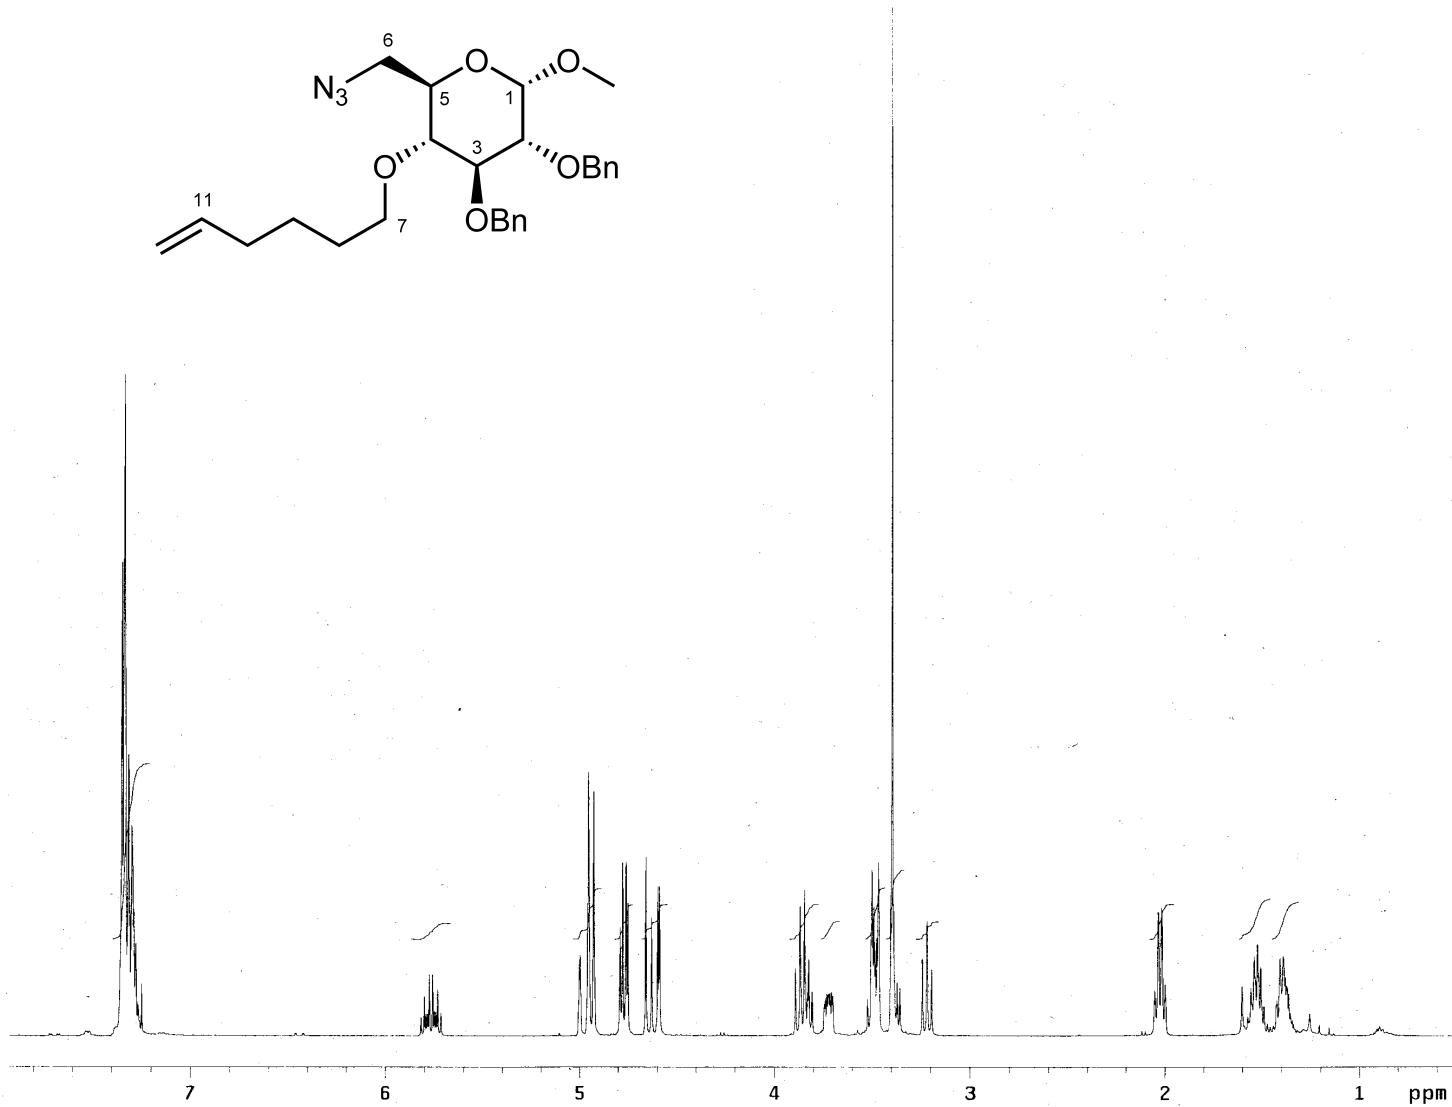

```

dos287.1H.cdcl3
Tue Nov 2 15:56 2004
exp1 std1h
SAMPLE
date Nov 2 2004
solvent CDCl3
file exp
ACQUISITION
instrum m400
probe asw5
seqfil s2pul
sfrq 399.937
tn H1
at 2.562
np 65536
sw 12787.7
bs 8
tpwr 58
pw 2.8
d1 1.000
d2 0
tof 828.3
nt 16
ct 16
alock n
gain not used
FLAGS
il n
in nw
dp y
DEC. & VT
dn H1
dfrq 399.936
homo n
dpwr 30
dof 0.0
dm nnn
dmm c
dmf 200
PROCESSING
lb 0.40
wtfile
proc ft
fn 65536
DISPLAY
sp 203.5
wp 2965.6
vs 162
sc 65
wc 225
hzmm 13.18
is 346.29
rfl 3551.6
rfp 0
th 2.1
ins 2.000
rp 2.1
lp -193.8
nm ph

```

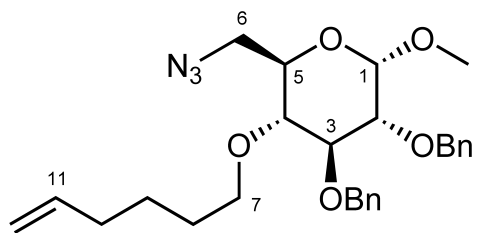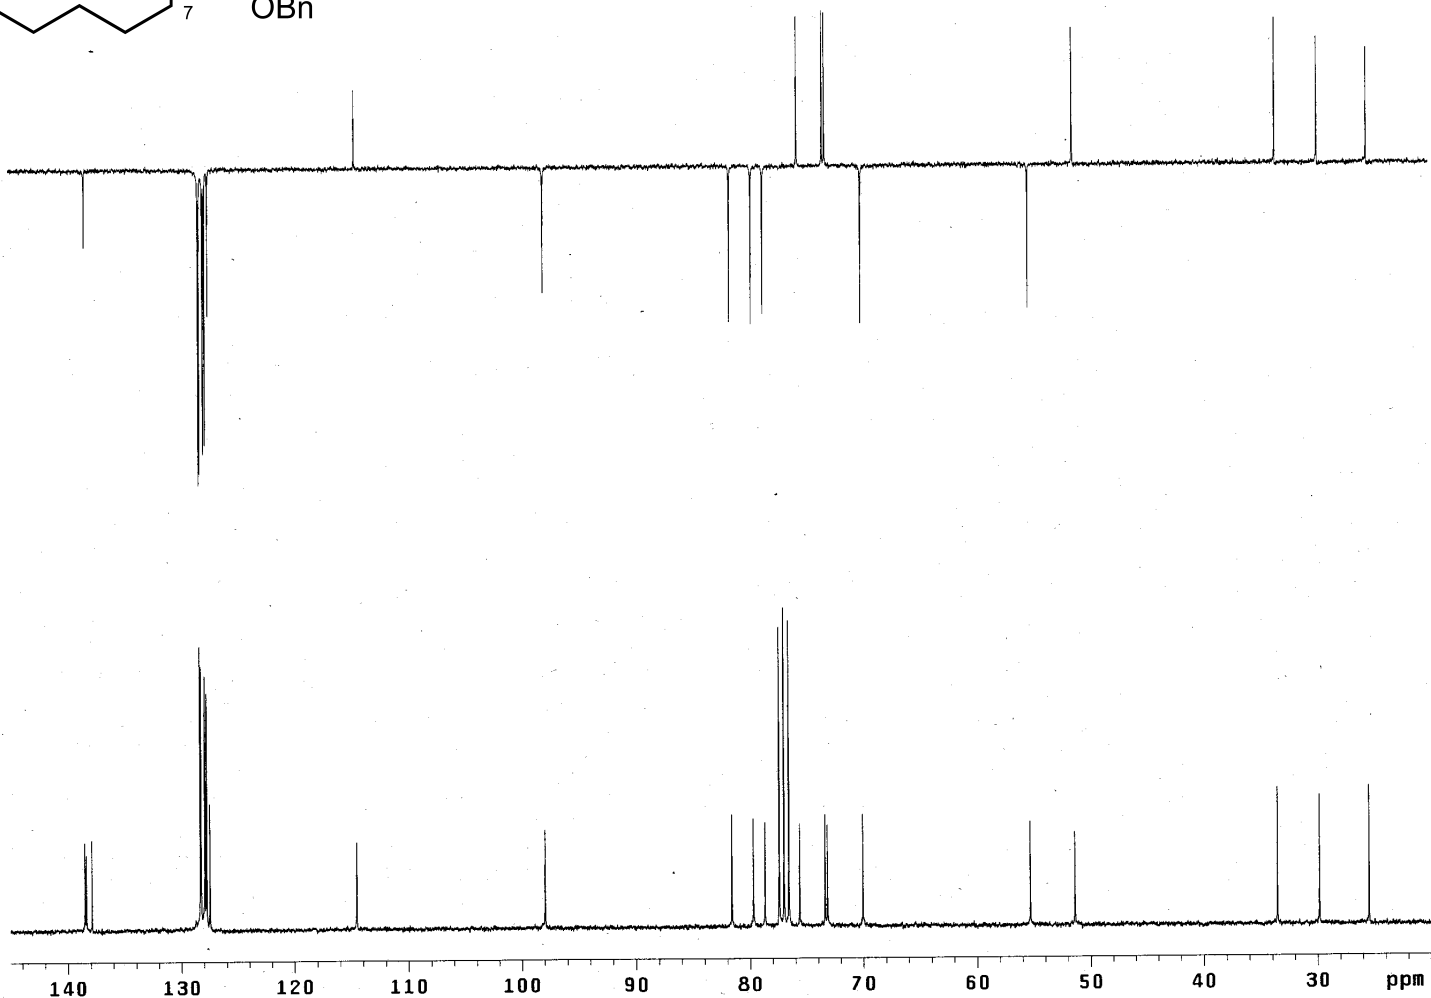

DOS287/CDC13/136  
 Doerner 021104\_03  
 DEPT-135  
 Tue Nov 2 17:42 2004

exp7 dept

SAMPLE  
 date Nov 2 2004  
 solvent CDCl3  
 file exp

ACQUISITION  
 instrum g300  
 probe atb5  
 seqfil dept  
 sfrq 75.500  
 tn C13  
 at 1.747  
 np 65906  
 sw 18867.9  
 bs 16  
 tpwr 56  
 pw 9.6  
 d1 2.000  
 d2 0  
 tof 767.8  
 nt 500  
 ct 500  
 alock n  
 gain not used  
 pp 16.2  
 pplvl 56  
 J 140.0  
 mult 1.5  
 satdly 0

FLAGS  
 il n  
 in n

DEC. & VT  
 dn H1  
 dfrq 300.225  
 homo n  
 dpwr 37  
 dof 0  
 dm nny  
 dmm ccw  
 dmf 7900  
 pplvl 56  
 pp 16.2  
 J 140.0

PROCESSING  
 lb 1.00  
 wtfile ft  
 proc fn 65536

wexp procplot  
 DISPLAY  
 sp 1509.7  
 wp 9437.1  
 vs 50  
 sc 65  
 wc 225  
 hzmm 41.94  
 rfl 1137.9  
 rfp 0  
 th 5.0  
 rp 248.4  
 lp -280.7  
 nm no ph

**Allyl 3,4-di-*O*-acetyl-6-azido-2,6-dideoxy-2-[(trifluoroacetyl)amino]- $\beta$ -D-glucopyranoside (13)<sup>[2]</sup>**

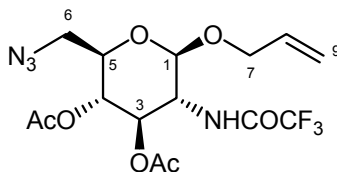

**<sup>1</sup>H-NMR** (500 MHz, CDCl<sub>3</sub>):  $\delta$  [ppm] = 2.04, 2.05 (s, 3H, CH<sub>3(Ac)</sub>), 3.22 (dd,  $J$  = 13.4, 2.4 Hz, 1H, 6<sup>a</sup>-H), 3.46 (dd,  $J$  = 13.4, 7.6 Hz, 1H, 6<sup>b</sup>-H), 3.75 (ddd,  $J$  = 10.0, 7.6, 2.4 Hz, 1H, 5-H), 4.05–4.09 (m, 1H, 2-H), 4.12 (dddd,  $J$  = 13.2, 6.4, 1.3, 1.3 Hz, 1H, 7<sup>a</sup>-H), 4.37 (dddd,  $J$  = 13.2, 4.9, 1.5, 1.5 Hz, 1H, 7<sup>b</sup>-H), 4.73 (d,  $J$  = 8.3 Hz, 1H, 1-H), 5.00 (dd,  $J$  = 10.0, 9.3 Hz, 1H, 4-H), 5.22 (ddd,  $J$  = 10.4, 2.6, 1.3 Hz, 1H, 9<sup>a</sup>-H), 5.28 (ddd,  $J$  = 17.2, 3.2, 1.6 Hz, 1H, 9<sup>a</sup>-H), 5.34 (dd,  $J$  = 10.7, 9.3 Hz, 1H, 3-H), 5.84 (dddd,  $J$  = 17.2, 10.4, 6.4, 4.9 Hz, 1H, 8-H), 6.91 (bd,  $J$  = 9.0 Hz, 1H, NH)

**<sup>13</sup>C-NMR** (125 MHz, CDCl<sub>3</sub>):  $\delta$  [ppm] = 20.49, 20.68 (q, CH<sub>3(Ac)</sub>), 51.14 (t, C-6), 54.80 (d, C-2), 69.67 (d, C-4), 69.97 (t, C-7), 77.52 (d, C-3), 73.70 (d, C-5), 98.71 (d, C-1), 115.45 (q,  $^1J(^{13}\text{C}, ^{19}\text{F}) = 287.3$  Hz, CF<sub>3</sub>), 118.21 (t, C-9), 132.74 (d, C-8), 157.23 (q,  $^2J(^{13}\text{C}, ^{19}\text{F}) = 37.4$  Hz, C(O)CF<sub>3</sub>), 169.30, 171.04 (s, CO).–

|                   |                                                                                 |                      |       |          |
|-------------------|---------------------------------------------------------------------------------|----------------------|-------|----------|
| <b>HRMS (ESI)</b> | C <sub>15</sub> H <sub>19</sub> F <sub>3</sub> N <sub>4</sub> O <sub>7</sub> Na | [M+Na <sup>+</sup> ] | calcd | 447.1098 |
|                   |                                                                                 |                      | found | 447.1095 |

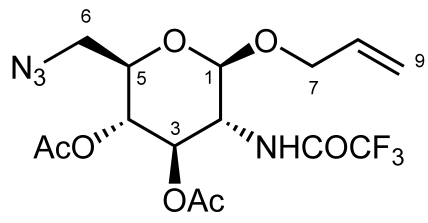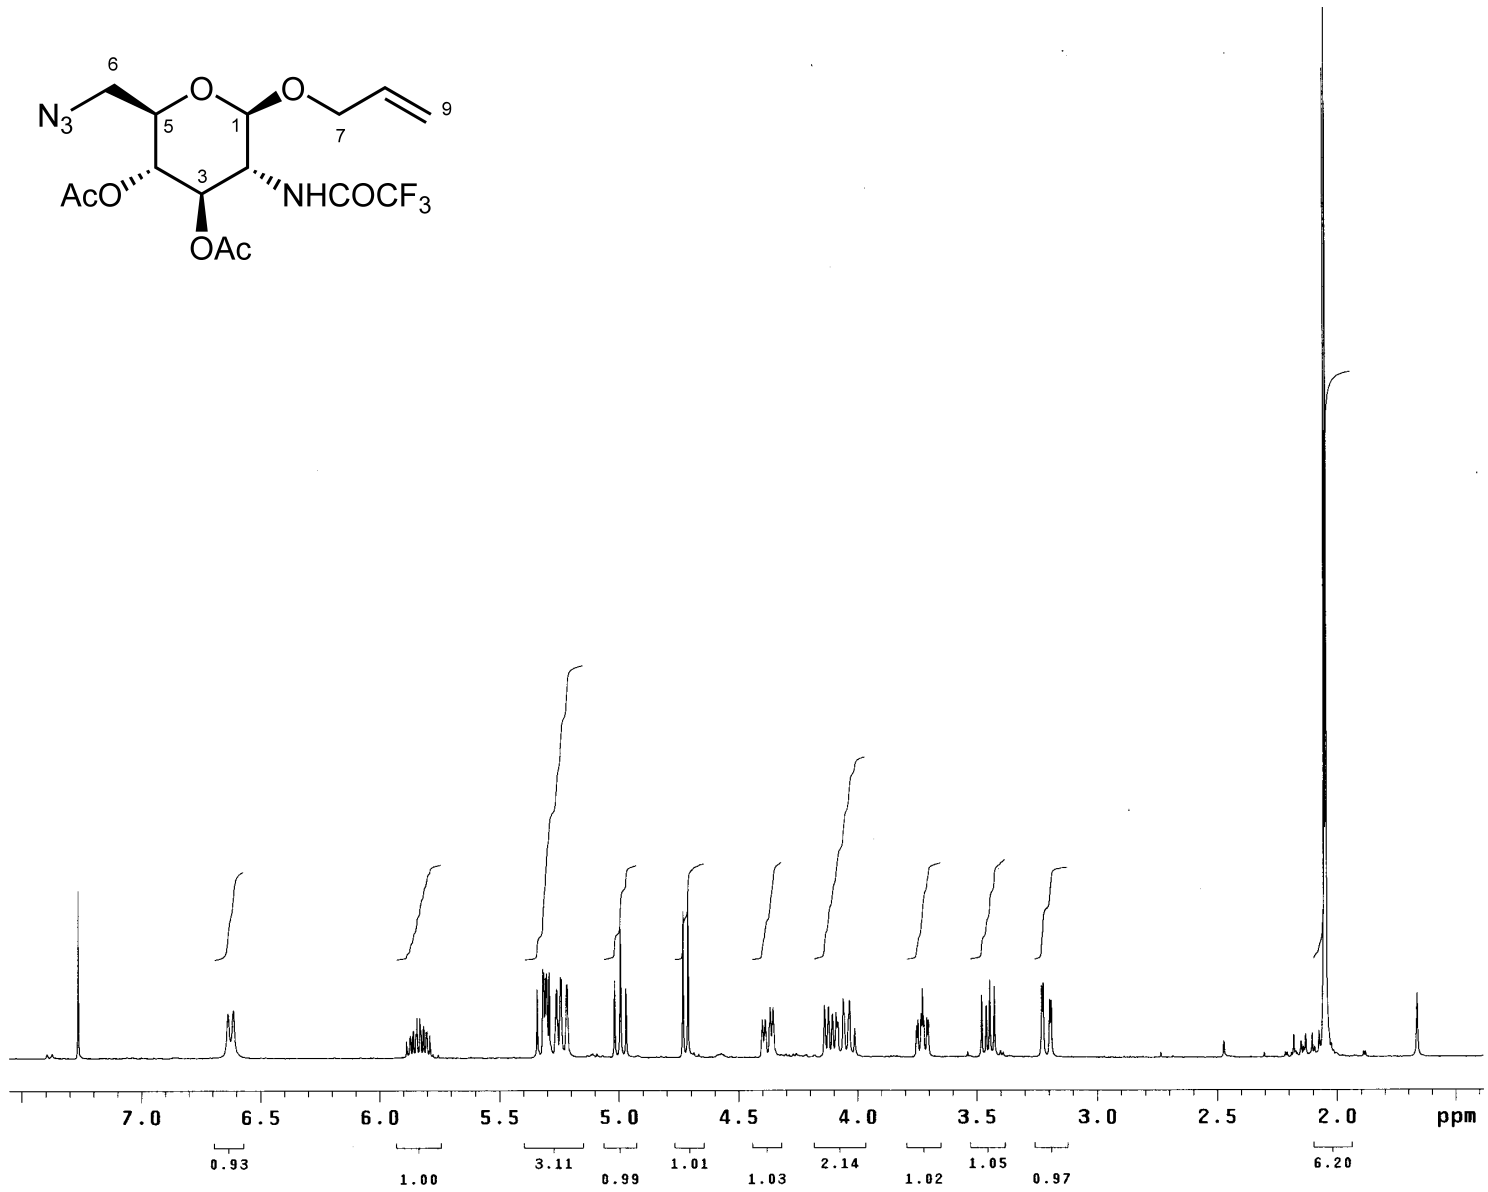

```

1H Standard-Parameter
Mon Jan 10 17:41 2005
exp7 std1h
SAMPLE
date Jan 10 2005
solvent CDC13
file exp
ACQUISITION
instrum m400
probe asw5
seqfil s2pul
sfrq 399.937
tn H1
at 2.562
np 65536
sw 12787.7
bs 8
tpwr 58
pw 2.8
d1 1.000
d2 0
tof 828.3
nt 16
ct 0
alock
gain not used
FLAGS
il n
in nw
dp y
DEC. & VT
dn H1
dfrq 399.936
homo n
dpwr 30
dof 0.0
dm nnn
dmm c
dmf 200
PROCESSING
lb 0.40
wtfile
proc ft
fn 65536
DISPLAY
sp 553.0
wp 2467.6
vs 162
sc 65
wc 225
hzmm 10.97
is 977.74
rf1 3544.8
rfp 0
th 2.1
ins 1.000
rp -2.4
lp -189.1
nm ph
  
```

### 3 Experimental data and spectra for dimerized molecules 14–17

Butane-1,4-diylbis[1*H*-7,8,9-triazole-5,7-diylmethylene(12*S*,13*S*,14*R*,15*S*,16*S*)-16-(allyloxy)tetrahydro-2*H*-pyran-12,13,14,15-tetrayl] hexaacetate (14)

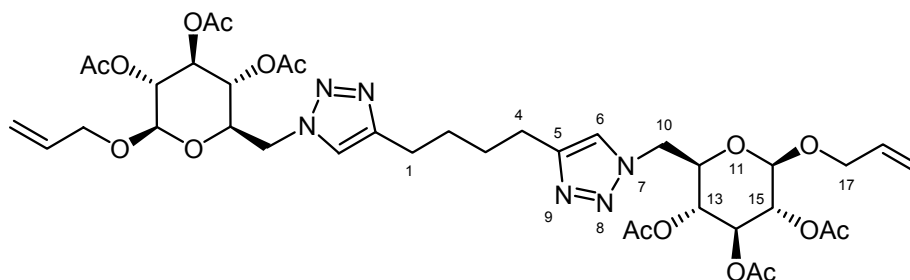

$$[\alpha]_{\text{D}}^{23} = -21.5 \quad (c = 0.265, \text{CHCl}_3)$$

**<sup>1</sup>H-NMR** (400 MHz, CDCl<sub>3</sub>): δ [ppm] = 1.75 (bs, 4H), 2.01, 2.04, 2.10 (s, 3H, CH<sub>3(Ac)</sub>), 2.75 (bs, 4H), 3.85–3.98 (m, 4H), 4.16 (dd, *J* = 13.3, 4.7 Hz, 2H), 4.33 (dd, *J* = 14.4, 8.6 Hz, 2H), 4.46 (d, *J* = 8.2 Hz, 2H), 4.58 (dd, *J* = 14.4, 1.2 Hz, 2H), 4.88 (t, *J* = 9.8 Hz, 2H), 5.00 (dd, *J* = 9.6, 8.0 Hz, 2H), 5.10–5.18 (m, 4H), 5.22 (t, *J* = 9.6 Hz, 2H), 5.69–5.80 (m, 2H), 7.42 (bs, 2H).–

**<sup>13</sup>C-NMR** (100 MHz, CDCl<sub>3</sub>): δ [ppm] = 20.65, 20.71, 20.75 (q, CH<sub>3(Ac)</sub>), 25.38, 29.08, (t, C-4, C-3), 50.80 (t, C-10), 69.93 (t, C-17), 70.13, 71.08, 72.39 (d, C-12, C-13, C-14, C-15), 99.29 (d, C-16), 117.86 (t, C-18), 122.50 (d, C-6), 132.63 (d, C-18), 147.65 (s, C-5), 169.14, 169.54, 169.90 (s, CO).–

|                   |                                                                   |                      |       |          |
|-------------------|-------------------------------------------------------------------|----------------------|-------|----------|
| <b>HRMS (ESI)</b> | C <sub>38</sub> H <sub>52</sub> N <sub>6</sub> O <sub>16</sub> Na | [M+Na <sup>+</sup> ] | calcd | 871.3332 |
|                   |                                                                   |                      | found | 871.3318 |

|                                                                         |       |         |        |
|-------------------------------------------------------------------------|-------|---------|--------|
| <b>C<sub>38</sub>H<sub>52</sub>N<sub>6</sub>O<sub>16</sub></b> (848.85) | Calcd | C 53.77 | H 6.17 |
|                                                                         | Found | C 53.99 | H 6.46 |



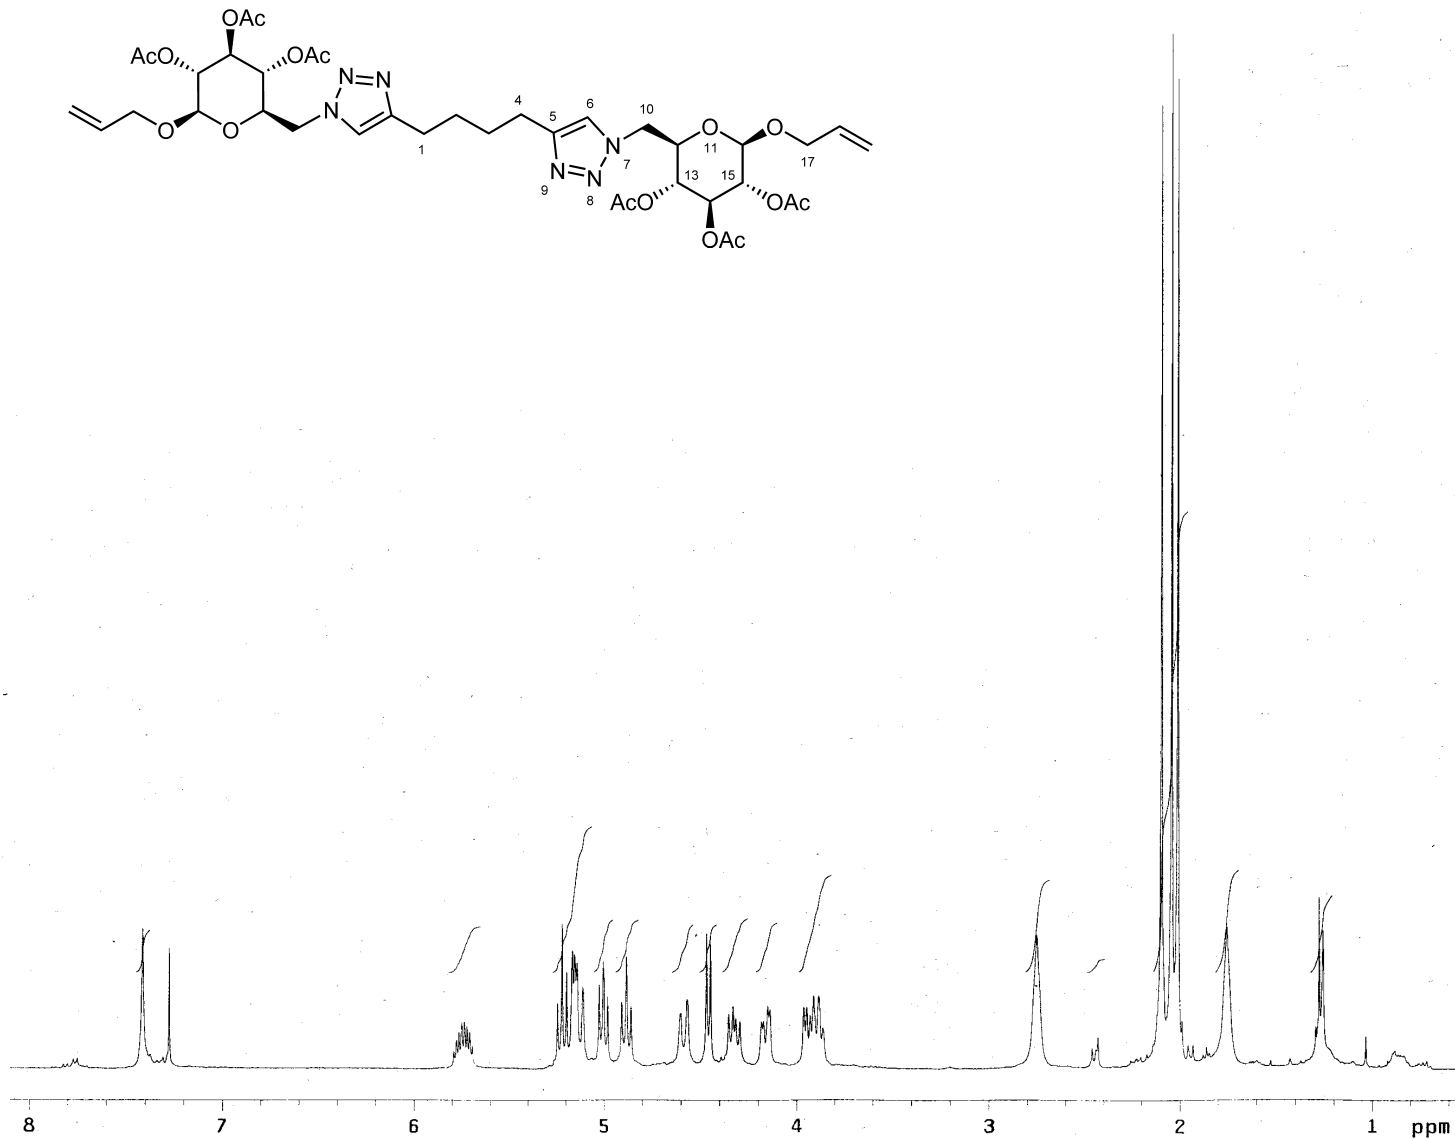

```

dos283.1H.cdc13
Fri Oct 22 15:25 2004
exp6 std1h

SAMPLE
date Oct 22 2004
solvent CDC13
file exp
ACQUISITION
instrum m400
probe asw5
seqfil s2pul
sfrq 399.937
tn H1
at 2.562
np 65536
sw 12787.7
bs 8
tpwr 58
pw 2.8
d1 1.000
d2 0
tof 828.3
nt 20
ct 20
alock n
gain not used
FLAGS
il n
in nw
dp y
DEC. & VT
dn H1
dfrq 399.936
homo n
dpwr 30
dof 0.0
dm hnn
dmm c
dmf 200
PROCESSING
lb 0.40
wtfile
proc ft
fn 65536

DISPLAY
sp 221.3
wp 3018.3
vs 162
sc 65
wc 225
hzmm 13.41
is 929.56
rf1 3540.5
rfp 0
th 2.1
ins 100.000
rp 18.8
lp -238.8
nm ph

```

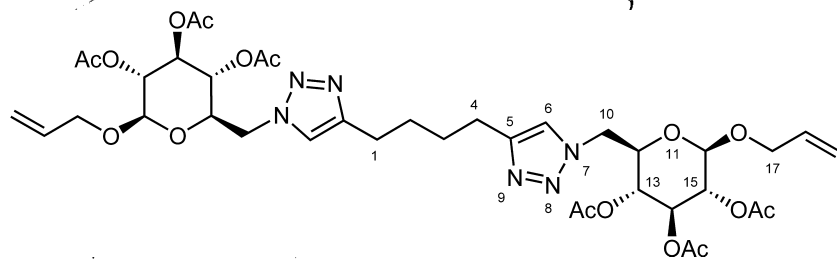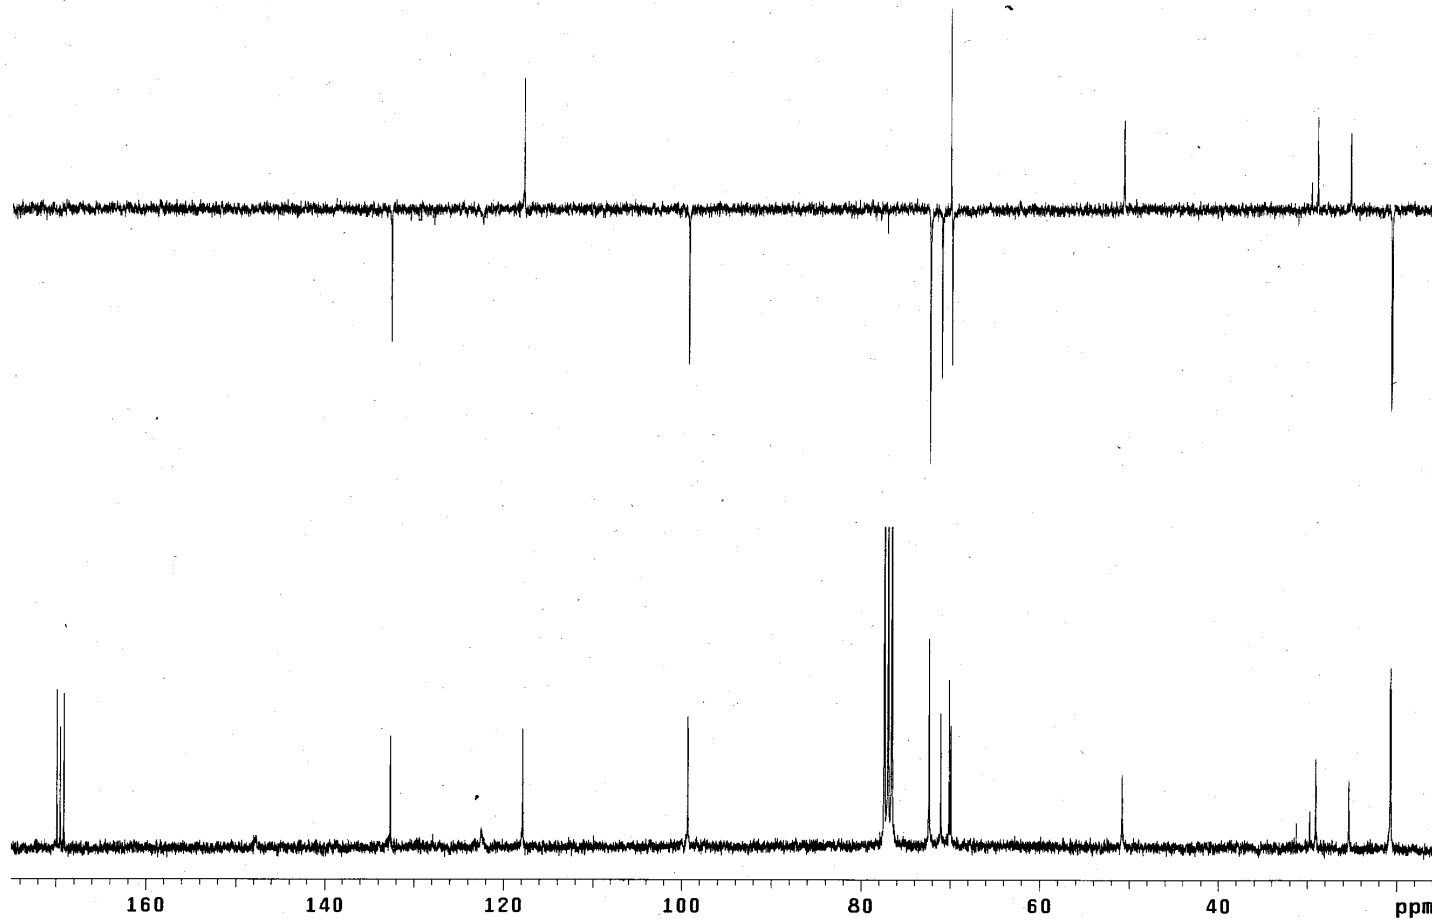

DOS283/CDC13/13C  
Doerner 251004\_01  
DEPT-135  
Mon Oct 25 16:21 2004

exp9 dept

SAMPLE  
date Oct 25 2004  
solvent CDC13  
file exp

ACQUISITION  
instrum g300  
probe atb5  
seqfil dept  
sfrq 75.500  
tn C13  
at 1.747  
np 65906  
sw 18867.9  
bs 16  
tpwr 56  
pw 9.6  
d1 2.000  
d2 0  
tof 767.8  
nt 1000  
ct 1000  
alock n  
gain not used  
pp 16.2  
pplvl 56  
J 140.0  
mult 1.5  
satdly 0

FLAGS  
f1 n  
f2 n  
DEC. & VT  
dn H1  
dfrq 300.225  
homo n  
dpwr 37  
dof 0  
dm nny  
dmm ccw  
dmf 7900  
pplvl 56  
pp 16.2  
J 140.0

PROCESSING  
lb 1.00  
wtfile  
proc ft  
fn 65536

wexp procplot  
DISPLAY  
sp 1132.4  
wp 12079.6  
vs 40  
sc 65  
wc 225  
hzmm 53.69  
rfl 1135.7  
rfp 0  
th 20.0  
rp 217.1  
lp -224.7  
nm no ph

**Butane-1,4-diylbis[1*H*-5,6,7-triazol-9,7-diylmethylene(11*S*,12*S*,13*S*,14*R*,15*S*)-14-(acetyl-amino)-15-allyltetrahydro-2*H*-pyran-11,12,13-triyl] tetraacetate (15)**

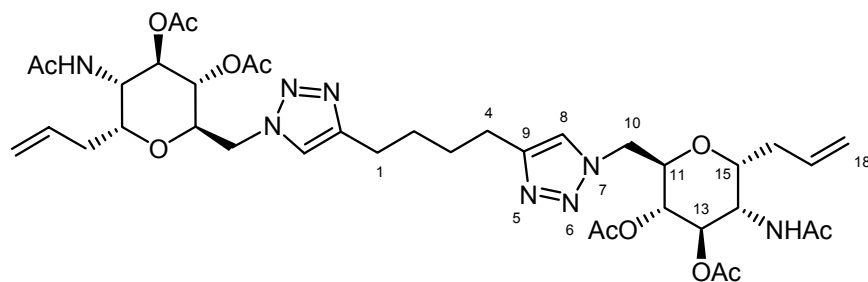

**<sup>1</sup>H-NMR** (400 MHz, CDCl<sub>3</sub>): δ [ppm] = 1.69–1.83 (bs, 4H, 3-H), 1.96 (s, 6H, CH<sub>3(NHAc)</sub>), 2.10, 2.12 (s, 6H, CH<sub>3(Ac)</sub>), 2.18–2.40 (m, 4H, 16-H), 2.70–2.80 (bs, 4H, 4-H), 3.97 (dt, *J* = 8.6, 2.7 Hz, 1H, 11-H), 4.25–4.38 (m, 6H), 4.54 (dd, *J* = 14.2, 2.5 Hz, 2H), 4.84–4.95 (m, 6H), 5.10 (t, *J* = 8.4 Hz, 2H), 5.36–5.48 (m, 2H, 17-H), 5.94 (d, *J* = 7.8 Hz, 2H, NH), 7.38 (s, 2H, 8-H).–

**<sup>13</sup>C-NMR** (100 MHz, CDCl<sub>3</sub>): δ [ppm] = 20.75, 20.80 (q, CH<sub>3(Ac)</sub>), 23.10 (q, CH<sub>3(NHAc)</sub>), 25.17, 28.90, 30.93 (t, C-3, C-4, C-16), 50.42 (t, C-10), 51.30 (d, C-14), 69.39, 70.15, 70.57, 71.79 (d, C-11, C-12, C-13, C-15), 117.85 (t, C-18), 122.36 (d, C-8), 132.81 (d, C-17), 147.81 (s, C-9), 169.42, 169.93, 171.44 (s, CO).–

|                   |                                                                   |                      |       |          |
|-------------------|-------------------------------------------------------------------|----------------------|-------|----------|
| <b>HRMS (ESI)</b> | C <sub>38</sub> H <sub>54</sub> N <sub>8</sub> O <sub>12</sub> Na | [M+Na <sup>+</sup> ] | calcd | 837.3753 |
|                   |                                                                   |                      | found | 837.3745 |

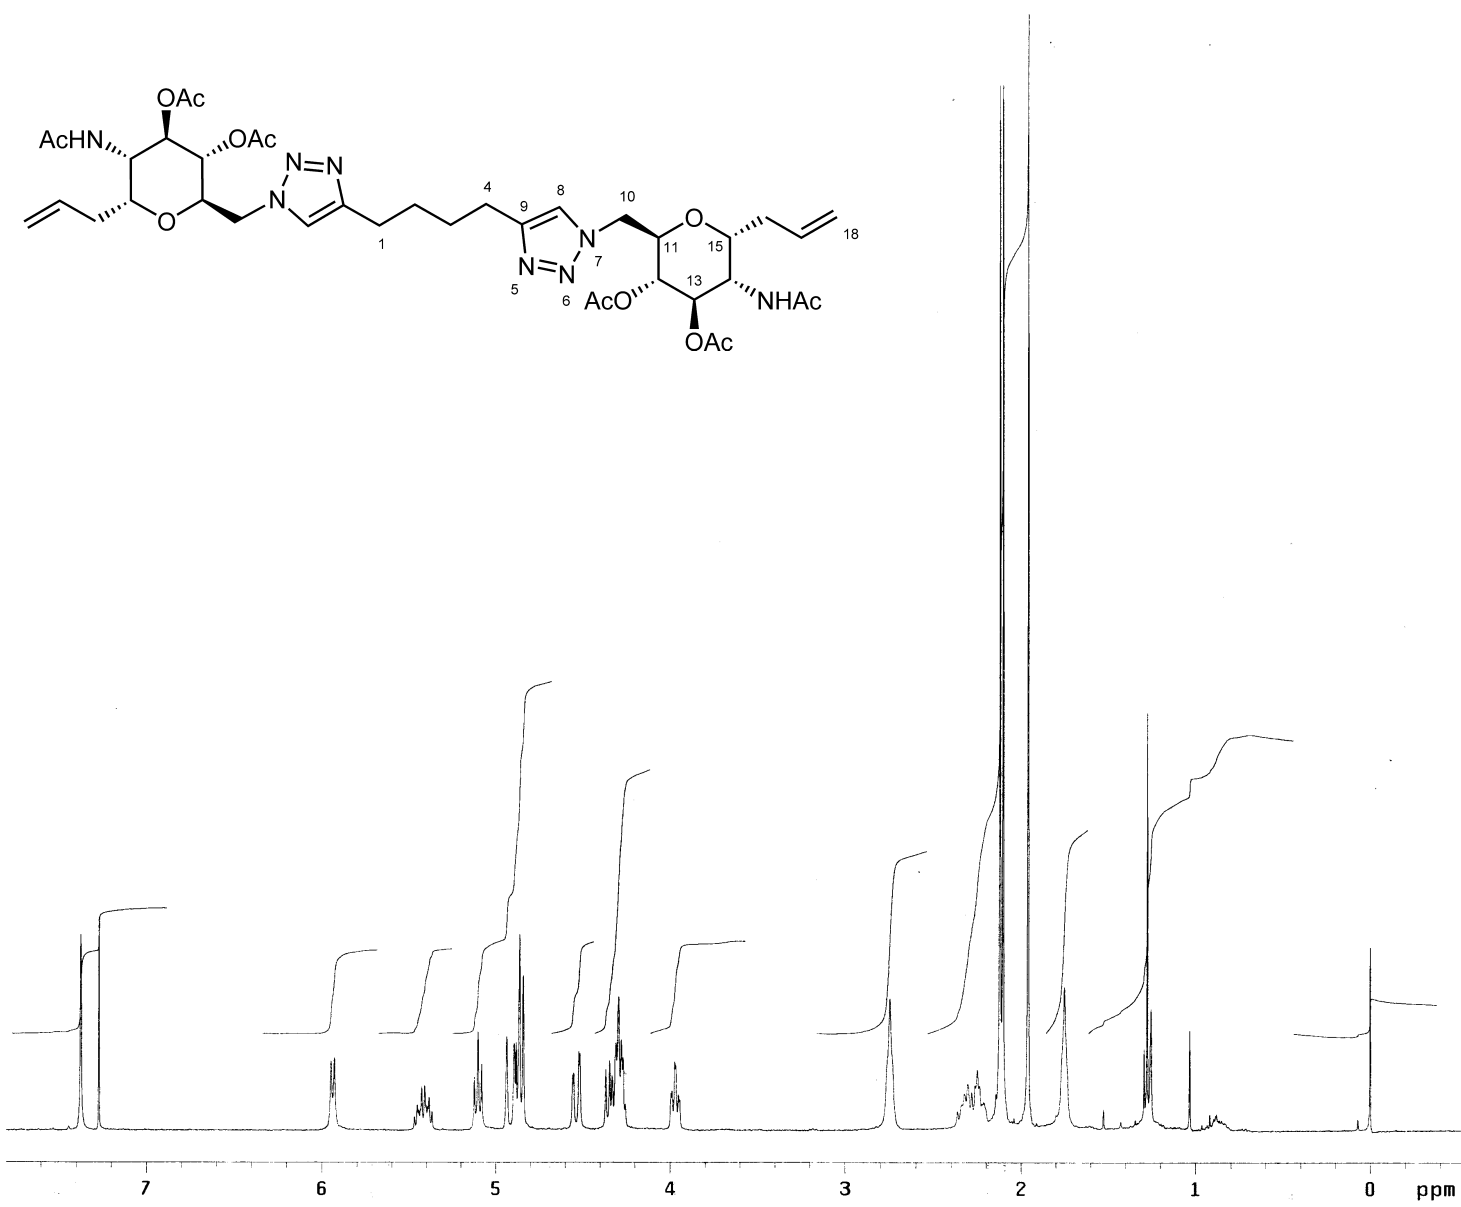

```

dos306.1H.cd13
Tue Nov 30 10:24 2004
exp7 std1h
SAMPLE
date Nov 30 2004
solvent CDCl3
file exp
ACQUISITION
instrum m400
probe asw5
seqfil s2pul
sfrq 399.937
tn H1
at 2.562
np 65536
sw 12787.7
bs 8
tpwr 58
pw 2.8
d1 1.000
d2 0
tof 828.3
nt 16
ct 16
alock n
gain not used
FLAGS
il n
in nw
dp y
DEC. & VT
dn H1
dfrq 399.936
homo n
dpwr 30
dof 0.0
dm nnn
dmm c
dmf 200
PROCESSING
lb 0.40
wtfile ft
proc ft
fn 65536
DISPLAY
sp -211.9
wp 3330.5
vs 162
sc 65
wc 225
hzmm 14.80
is 1904.45
rfl 3542.4
rfp 0
th 2.1
ins 100.000
rp 18.6
lp -221.1
nm ph

```

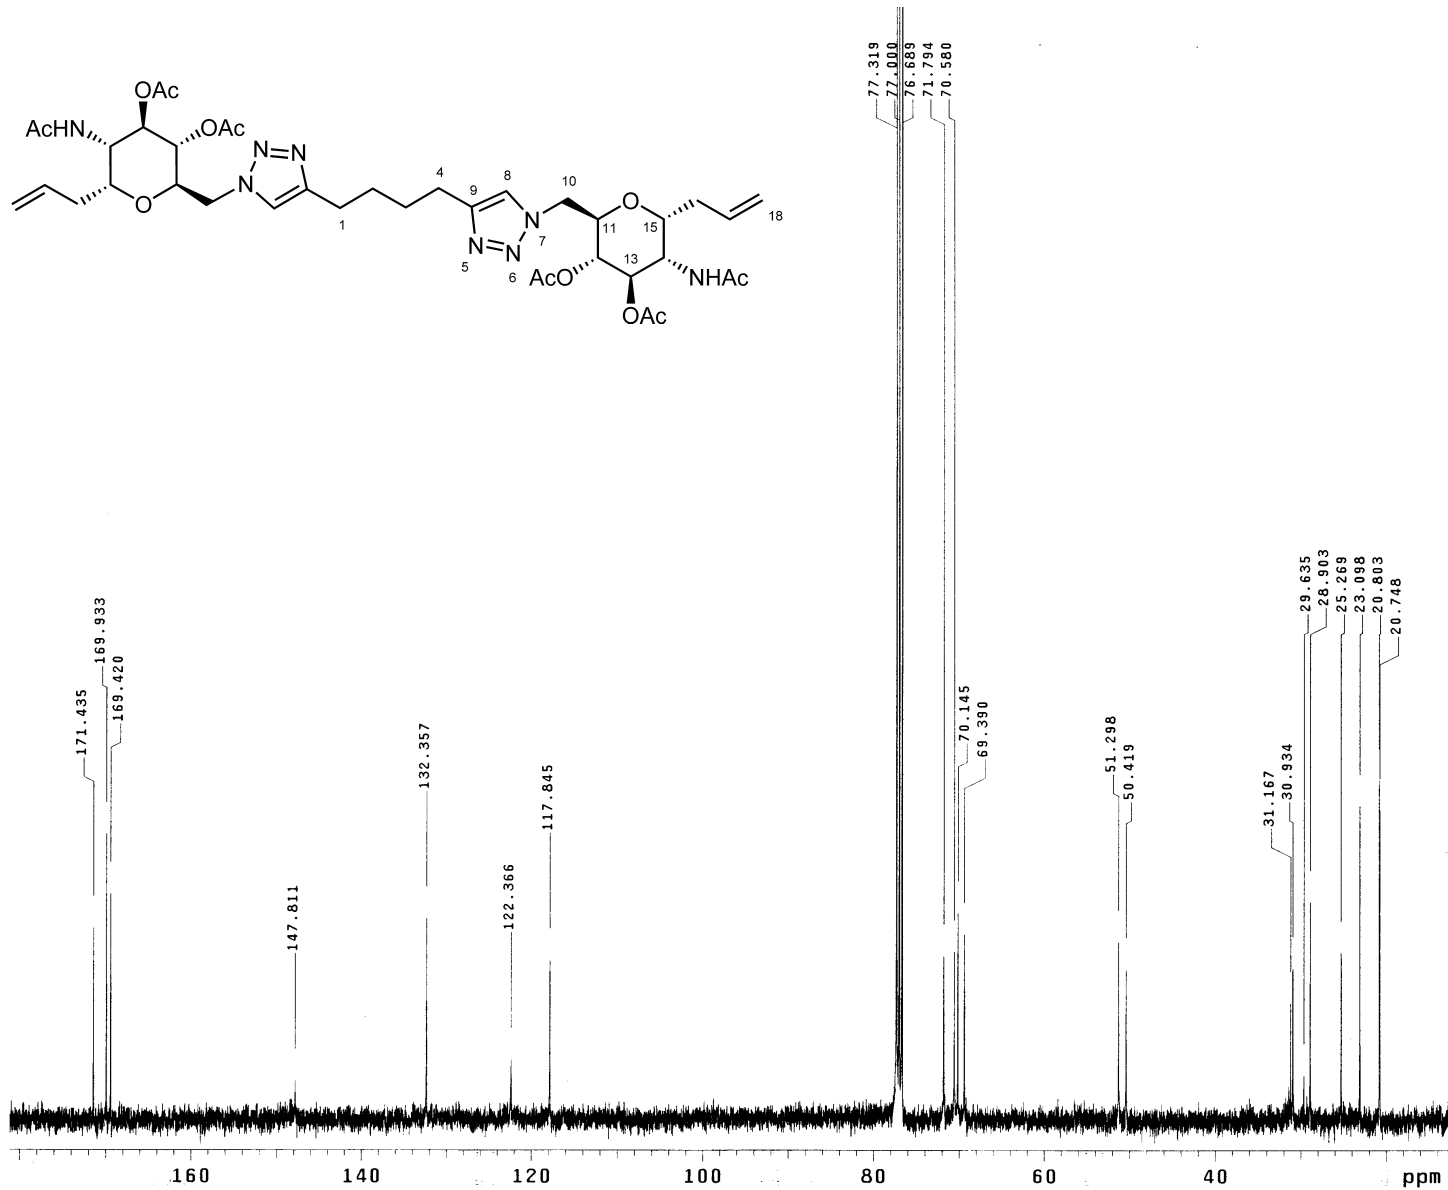

dos306.13C.cdc13  
Tue Nov 30 10:38 2004

exp8 std13c

SAMPLE  
date Nov 30 2004  
solvent CDC13  
file exp  
ACQUISITION  
instrum m400  
probe asw5  
seqfil s2pul  
sfrq 100.574  
tn C13  
at 1.311  
np 67216  
sw 25641.0  
bs 16  
tpwr 61  
pw 4.0  
d1 1.689  
d2 0  
tof 1327.2  
nt 1000  
ct 1000  
alock n  
gain not used  
FLAGS  
il n  
in nw  
dp y  
DEC. & VT  
dn H1  
dfrq 399.936  
homo n  
dpwr 40  
dof 0  
dm yyy  
dmm w  
dmf 9350  
pp 17.5  
PROCESSING  
lb 1.00  
wtfile ft  
proc  
fn 65536  
DISPLAY  
sp 1278.9  
wp 16934.6  
vs 379  
sc 65  
wc 225  
hzmm 75.27  
rfl 9744.0  
rfp 7743.4  
th 5.2  
rp 57.5  
lp -329.5  
nm no ph

**18,23-Butane-19,22-diylbis(14-{[(2*R*,3*R*,4*S*,5*R*,6*S*)-4,5-bis(benzyloxy)-3-(hex-11-ene-7-yloxy)-6-methoxytetrahydro-2*H*-pyran-2-yl]methyl}-1*H*-14,15,16-triazole) (16)**

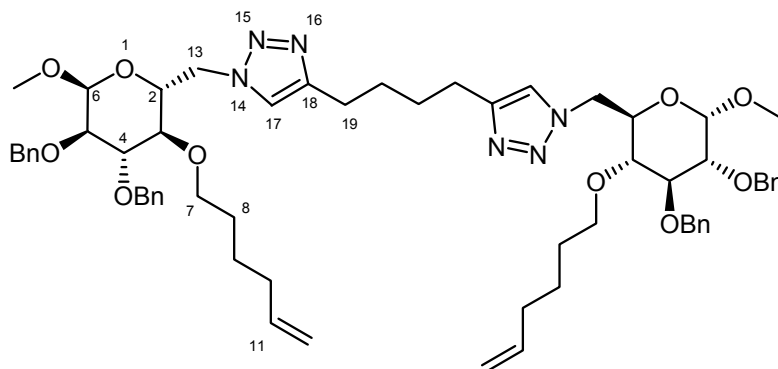

**<sup>1</sup>H-NMR** (400 MHz, CDCl<sub>3</sub>): δ [ppm] = 1.41–1.65 (m, 12H), 1.73 (bs, 4H, 16-H), 2.03–2.10 (m, 4H), 2.73 (bs, 4H, 15-H), 2.95 (t, *J* = 9.0 Hz, 2H), 3.18 (s, 6H, 17-H), 3.38 (dd, *J* = 9.8, 3.5 Hz, 2H), 3.60–3.67 (m, 2H), 3.82–3.93 (m, 6H), 4.48–4.57 (m, 4H), 4.62 (d, *J* = 12.5 Hz, 2H), 4.76 (d, *J* = 11.7 Hz, 4H), 4.92–5.01 (m, 6H), 5.74–5.85 (m, 2H, 11-H), 7.29–7.36 (m, 20H, CH arom.).–

**<sup>13</sup>C-NMR** (100 MHz, CDCl<sub>3</sub>): δ [ppm] = 25.31, 25.40, 28.90, 29.86, 33.57, 50.59 (t, CH<sub>2</sub>), 55.20 (d, CH), 69.39 (d, CH), 73.18, 73.39, 75.70 (t, CH<sub>2</sub> benzyl, C-7), 78.61, 79.68, 81.66 (d, CH), 97.97 (d, C-1), 114.61 (t, C-12), 122.14 (d, C-13), 127.68–128.45 (d, CH arom.), 137.96, 138.43 (s, C arom.), 138.56 (d, C-11), 147.83 (s, C-14).–

|                   |                                                                   |                      |       |           |
|-------------------|-------------------------------------------------------------------|----------------------|-------|-----------|
| <b>HRMS (ESI)</b> | C <sub>62</sub> H <sub>80</sub> N <sub>6</sub> O <sub>10</sub> Na | [M+Na <sup>+</sup> ] | calcd | 1091.5828 |
|                   |                                                                   |                      | found | 1091.5816 |

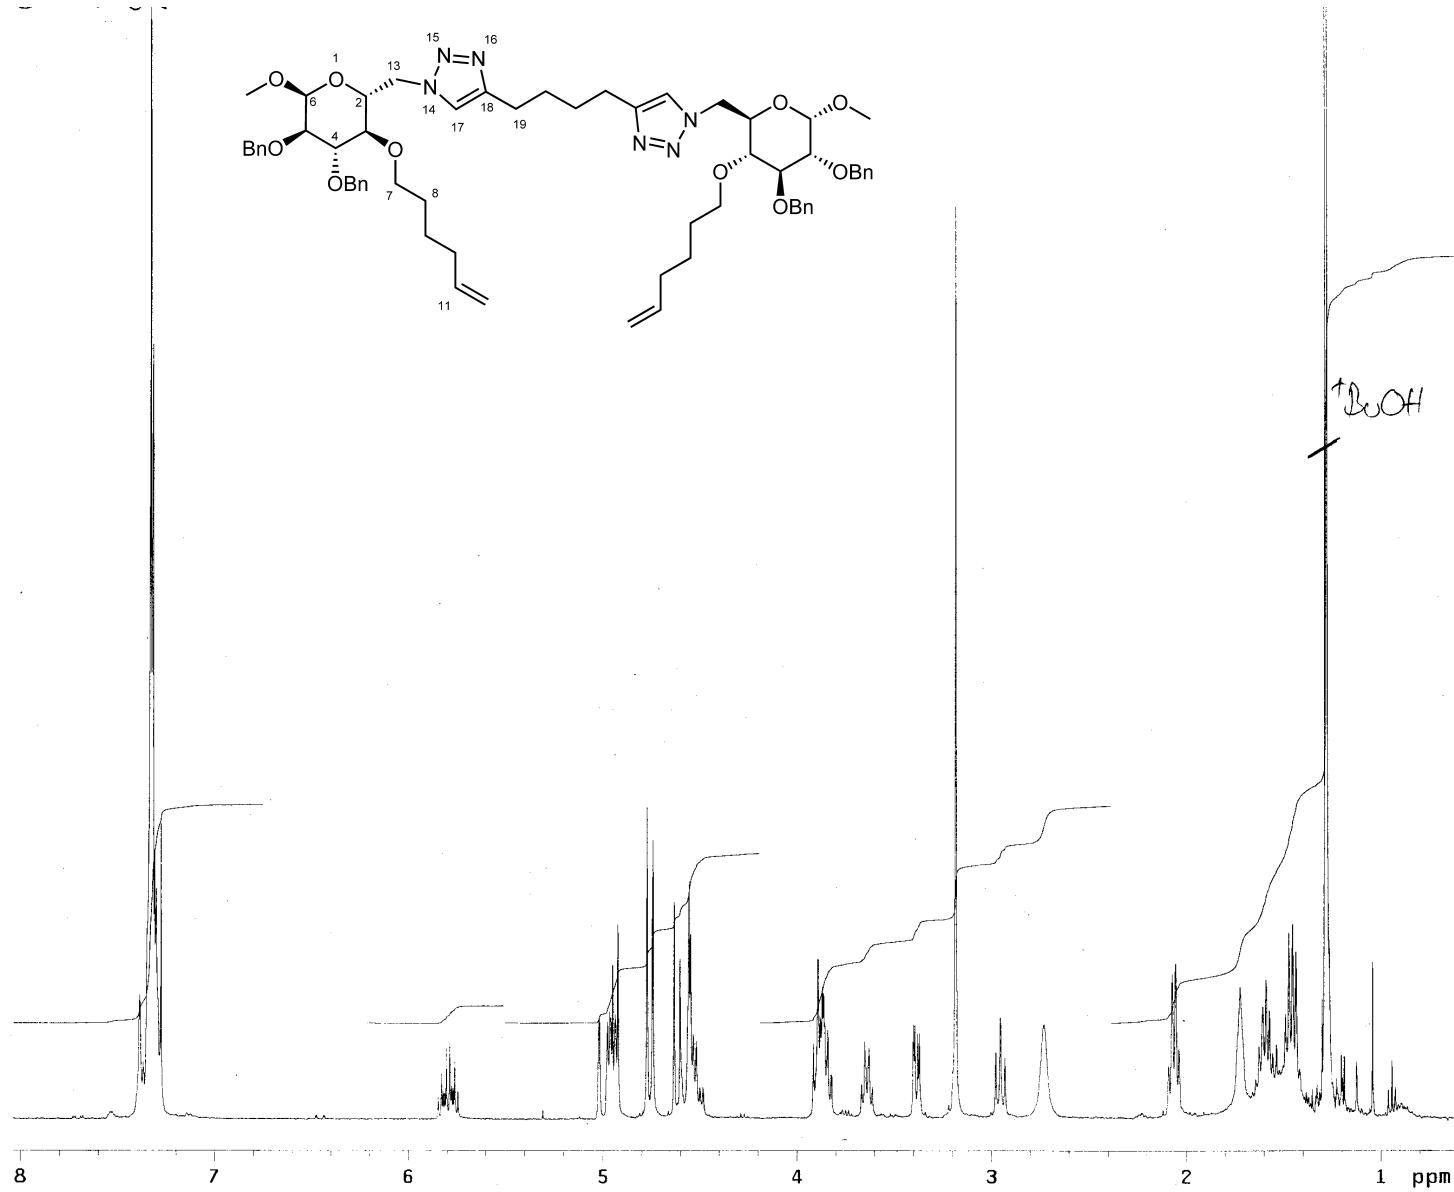

```

dos288.1H.cdc13
Fri Nov 5 18:08 2004
expl std1h
SAMPLE
date Nov 5 2004
solvent CDCl3
file exp
ACQUISITION
instrum m400
probe asw5
seqfil s2pul
sfrq 399.937
tn H1
at 2.562
np 65536
sw 12787.7
bs 8
tpwr 58
pw 2.8
d1 1.000
d2 0
tof 828.3
nt 16
ct 16
alock n
gain not used
FLAGS
il n
in nw
dp y
DEC. & VT
dn H1
dfrq 399.936
homo n
dpwr 30
dof 0.0
dm nnn
dmm c
dmf 200
PROCESSING
lb 0.40
wtfile
proc ft
fn 65536
DISPLAY
sp 241.1
wp 2973.0
vs 2249
sc 65
wc 225
hzmm 13.21
is 704.99
rf1 3539.8
rfp 0
th 2.9
ins 100.000
rp -0.2
lp -186.6
nm ph

```

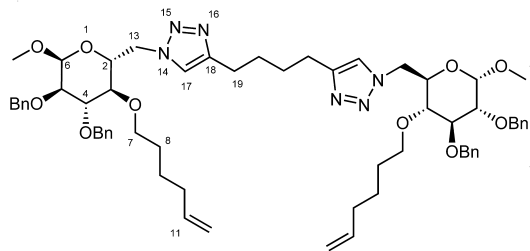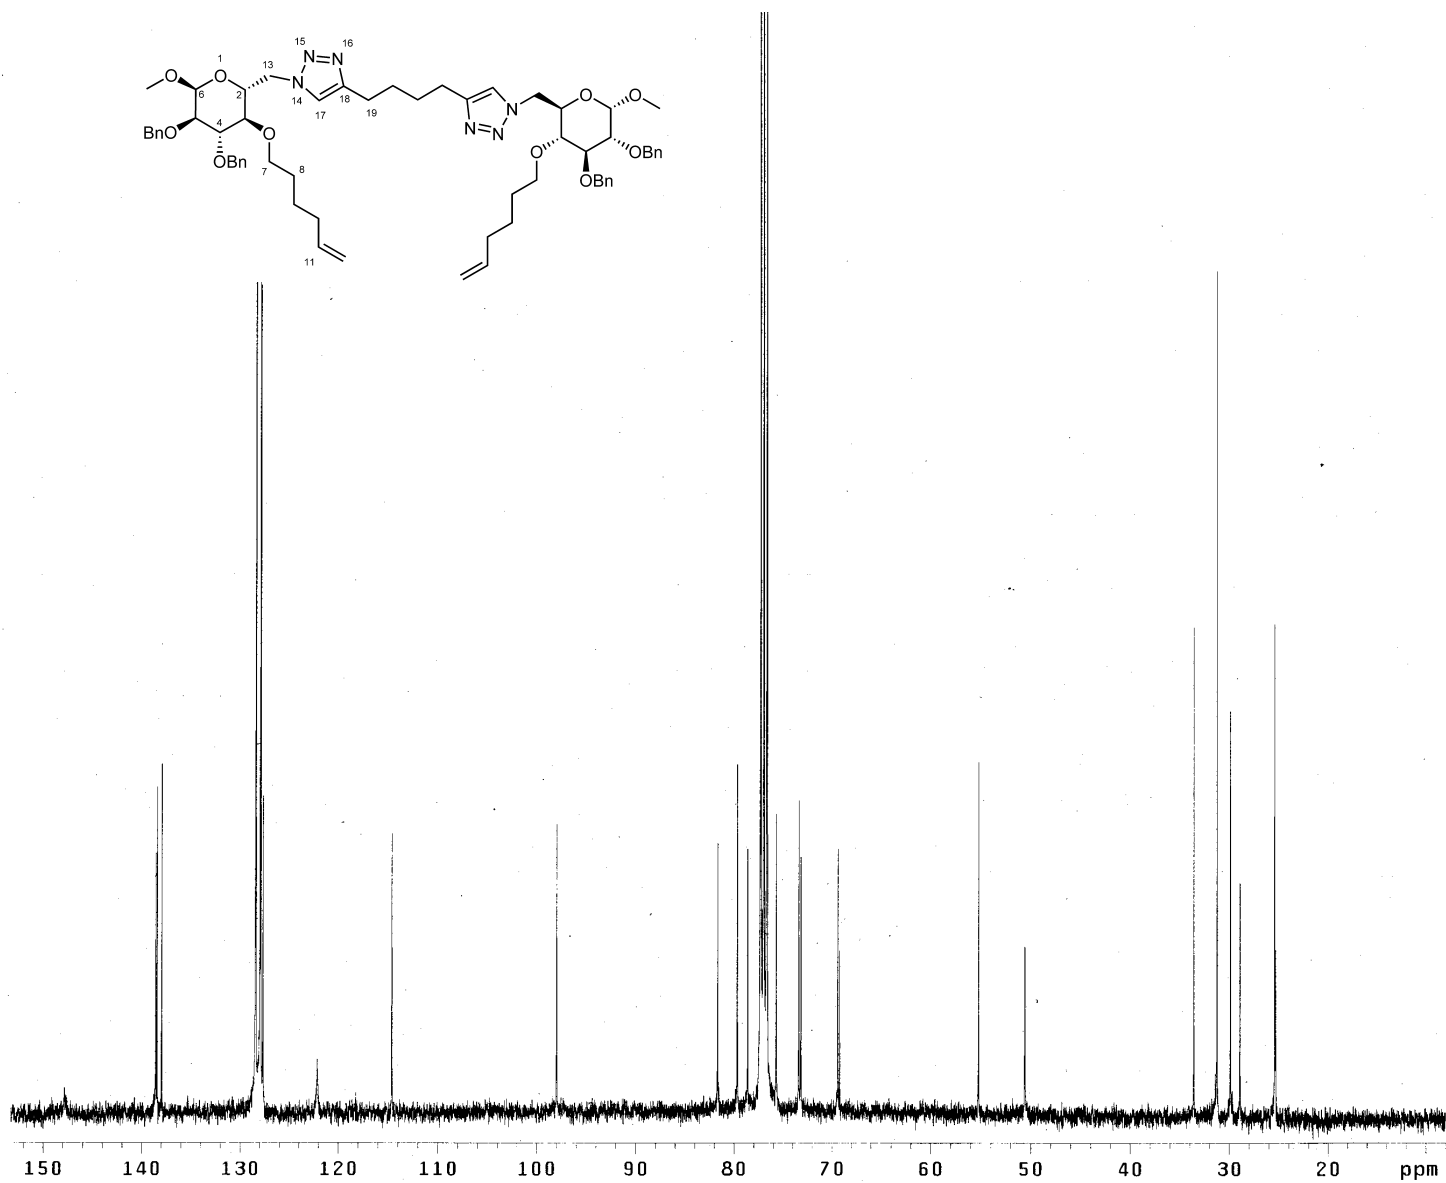

dos288,13C.cdc13  
Fri Nov 5 19:19 2004

exp2 std13c

SAMPLE  
date Nov 5 2004  
solvent CDC13  
file exp

ACQUISITION  
instrum m400  
probe asw5  
seqfil s2pul  
sfrq 100.574  
tn C13  
at 1.311  
np 67216  
sw 25641.0  
bs 16  
tpwr 61  
pw 4.0  
d1 1.689  
d2 0  
tof 1327.2  
nt 12000  
ct 12000  
alock n  
gain not used

FLAGS  
il n  
in n  
dp y

DEC. & VT  
dn H1  
dfrq 399.936  
homo n  
dpwr 40  
dof 0  
dm yyy  
dmm w  
dmf 9350  
pp 17.5

PROCESSING  
lb 1.00  
wtfile  
proc ft  
fn 65536

DISPLAY  
sp 803.5  
wp 14609.0  
vs 1091  
sc 65  
wc 225  
hzmm 64.93  
rfl 9742.1  
rfp 7743.4  
th 20.0  
rp 48.6  
lp -339.8  
nm no ph



**Butane-1,4-diylbis{1*H*-7,8,9-triazole-5,7-diylmethylene(12*S*,13*S*,14*S*,15*S*,16*S*)-16-(allyloxy)-15-[(trifluoroacetyl)amino]tetrahydro-2*H*-pyran-12,13,14-triyl} tetraacetate (17)**

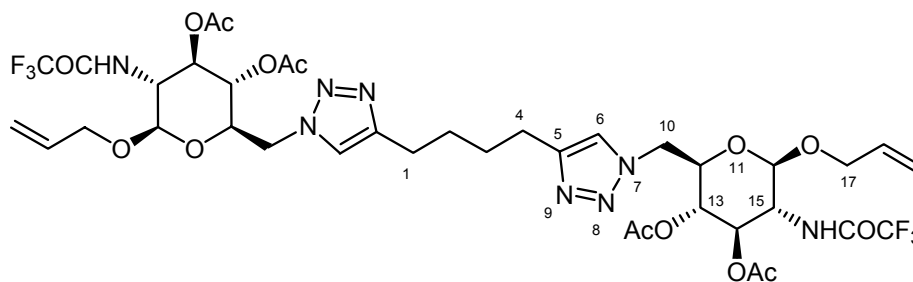

**<sup>1</sup>H-NMR** (400 MHz, DMSO-*d*<sub>6</sub>): δ [ppm] = 1.60 (bs, 4H), 1.90, 2.01 (s, 3H, CH<sub>3(Ac)</sub>), 2.61 (bs, 4H), 3.79–3.90 (m, 4H), 3.93–4.06 (m, 4H), 4.43 (dd, *J* = 14.6, 8.4 Hz, 2H), 4.58 (dd, *J* = 14.4, 2.7 Hz, 2H), 4.62 (d, *J* = 8.6 Hz, 2H), 4.80 (t, *J* = 9.6 Hz, 2H), 5.00–5.07 (m, 4H), 5.17 (dd, *J* = 10.3, 9.6 Hz, 2H), 5.63–5.74 (m, 2H), 7.80 (s, 2H), 9.63 (d, *J* = 9.0 Hz, 2H).–

**<sup>13</sup>C-NMR** (100 MHz, DMSO-*d*<sub>6</sub>): δ [ppm] = 20.16, 20.60 (q, CH<sub>3(Ac)</sub>), 24.71, 28.57, (t, C-4, C-3), 49.83 (t, C-10), 53.69 (d, C-15), 69.09 (t, C-17), 69.88, 71.39, 71.78 (d, C-14, C-13, C-12), 98.42 (d, C-16), 115.70 (m, CF<sub>3</sub>), 116.76 (t, C-19), 122.83 (d, C-6), 133.59 (d, C-18), 146.36 (s, C-5), 156.47 (m, C(O)CF<sub>3</sub>), 169.20, 169.39 (s, CO).–

|                   |                                                                   |                      |       |          |
|-------------------|-------------------------------------------------------------------|----------------------|-------|----------|
| <b>HRMS (ESI)</b> | C <sub>38</sub> H <sub>52</sub> N <sub>6</sub> O <sub>16</sub> Na | [M+Na <sup>+</sup> ] | calcd | 871.3332 |
|                   |                                                                   |                      | found | 871.3318 |

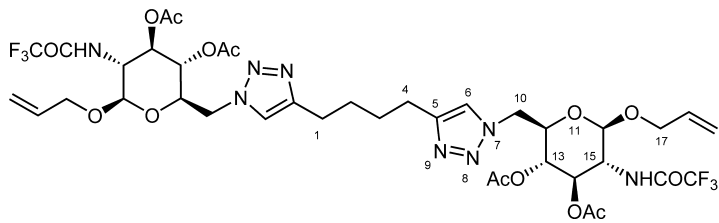

```

dos272.1H.dms0.110195
Tue Jan 11 12:40 2005

exp7 std1h

SAMPLE
date Jan 11 2005
solvent DMSO
file exp
ACQUISITION
instrum m400
probe asw5
seqfil s2pu1
sfrq 399.939
tn H1
at 2.562
np 65536
sw 12787.7
bs 8
tpwr 58
pw 2.8
d1 1.000
d2 0
tof 828.3
nt 16
ct 0
alock n
gain not used
FLAGS
il n
in nw
dp y
DEC. & VT
dn H1
dfrq 399.938
homo n
dpwr 30
dof 0.0
dm nnn
dmm c
dmf 200
PROCESSING
lb 0.40
wtfile ft
proc ft
fn 65536
DISPLAY
sp 304.3
wp 3761.7
vs 198
sc 85
wc 225
hzmm 16.72
is 2415.53
rfl 4532.2
rfp 1000.2
th 2.9
ins 1.000
rp 5.1
dp -194.8
nm ph
  
```

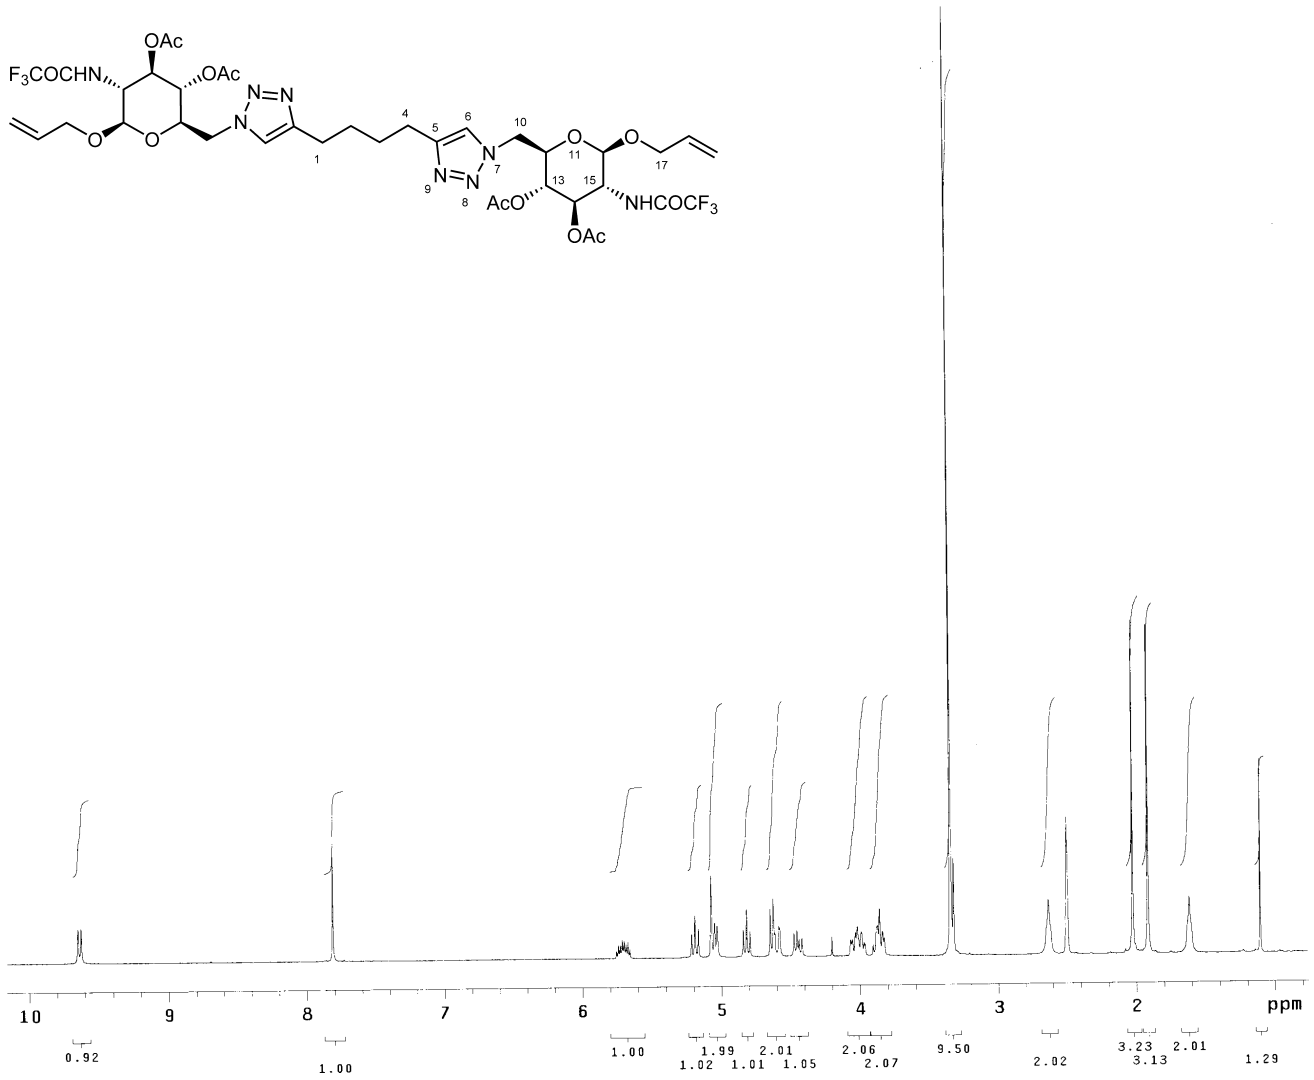

## 4 Experimental data and spectra for cyclic molecules 18–25

(1*R*,16*R*,17*R*,18*S*,19*R*,20*R*,23(*E*;Z),27*R*,28*R*,29*S*,30*R*)-21,26,31,32-tetraoxa-3,4,5,12,13,14-hexaazapentacyclo[25.3.1.1<sup>3,6</sup>.1<sup>11,14</sup>.1<sup>16,20</sup>]tetratriaconta-4,6(34),11(33),12,23-pentaene-17,18,19,28,29,30-hexayl hexaacetate (18)

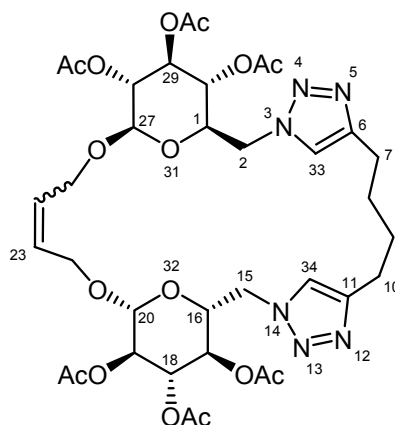

<sup>1</sup>H-NMR (400 MHz, CDCl<sub>3</sub>): isomer mixture: δ [ppm] = 1.66–1.82 (m, 4H, 8-H), 2.02, 2.02, 2.03, 2.12, 2.13 (s, 6H, CH<sub>3(Ac)</sub>), 2.70–2.88 (m, 4H, 7-H), 3.77–4.03 (m, 6H), 4.22–4.44 (m, 4H), 4.55–4.66 (m, 2H), 4.90–5.04 (m, 4H), 5.20–5.54 (m, 4H), 7.39, 7.59 (s, 2H, 33-H).–

<sup>13</sup>C-NMR (100 MHz, CDCl<sub>3</sub>) major isomer: δ [ppm] = 20.56, 20.59, 20.61 (q, CH<sub>3(Ac)</sub>), 25.32, 28.29 (t, C-7, C-8), 50.67 (t, C-2), 68.32 (t, C-22), 70.09, 71.22, 72.39, 72.56 (d, C-16–C-19), 99.67 (d, C-20), 122.61 (d, C-33), 128.34 (d, C-23), 147.53 (s, C-6), 169.87, 169.96, 170.04 (s, CO).–

**HRMS (ESI)** C<sub>36</sub>H<sub>48</sub>N<sub>6</sub>O<sub>16</sub>Na [M+Na<sup>+</sup>] calcd 843.3019  
found 843.3017

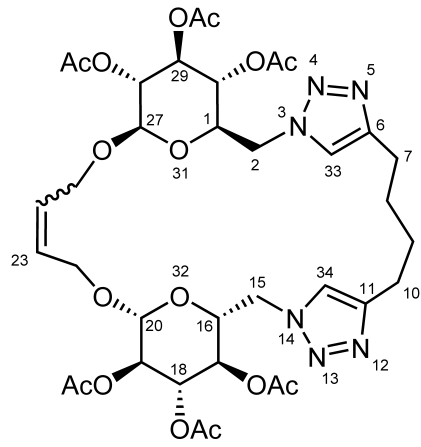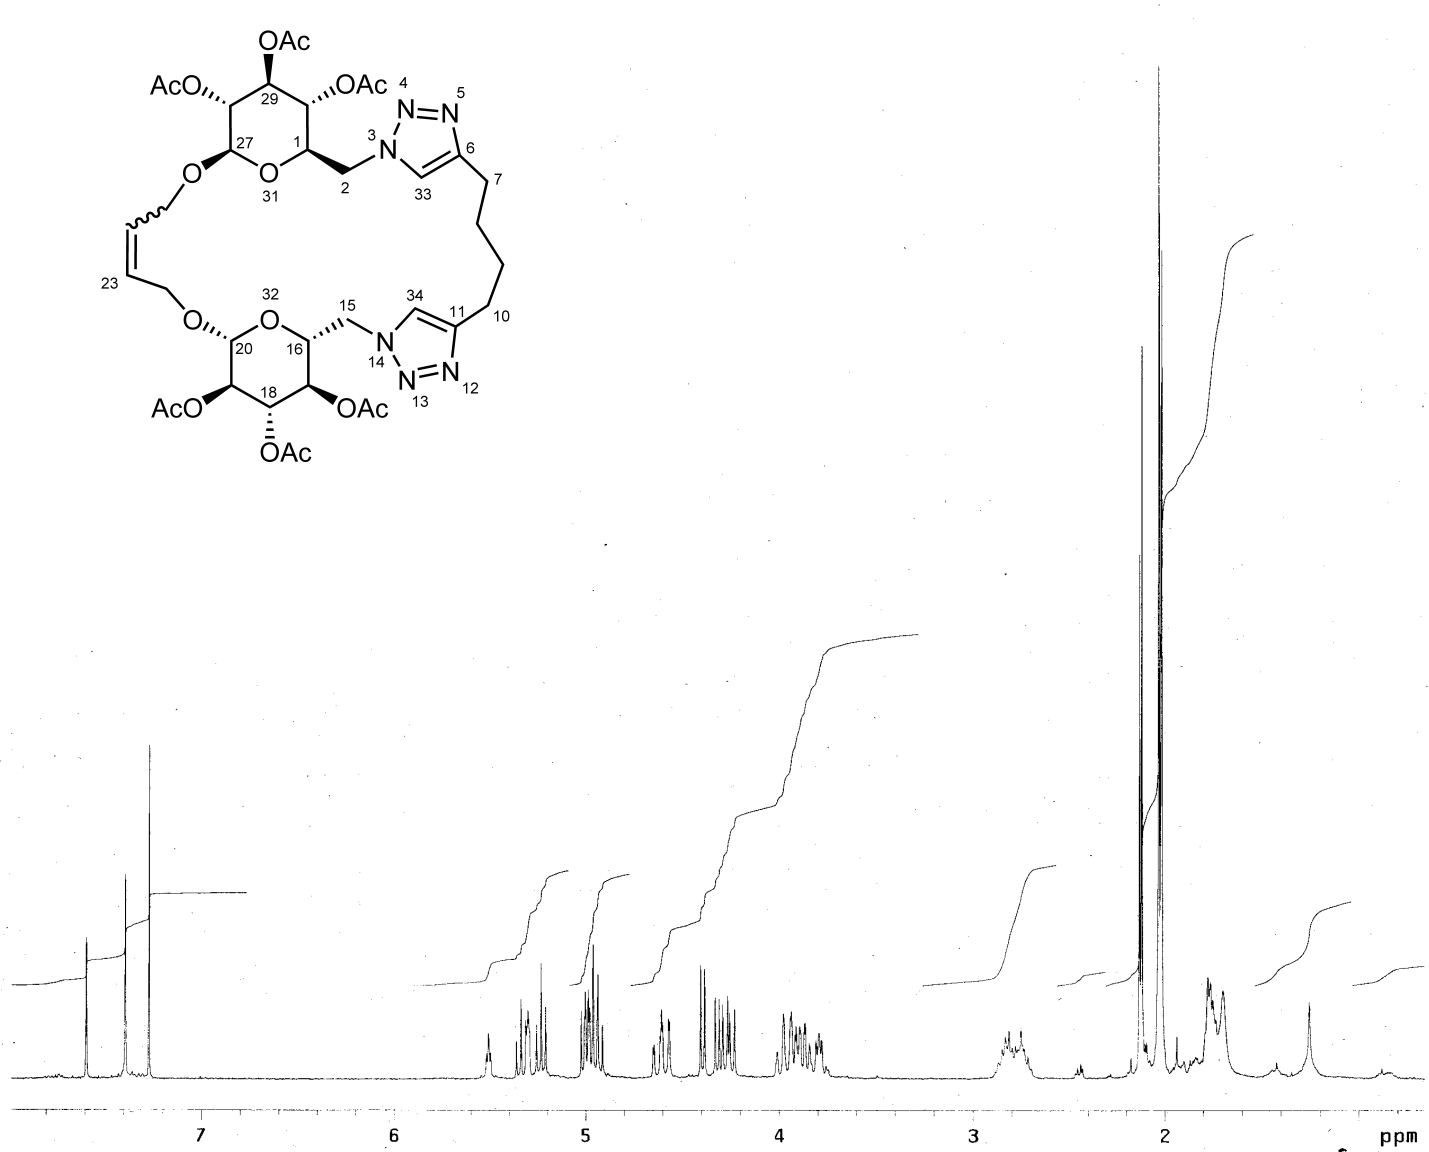

```

dos285.1H.cdc13
Fri Oct 29 13:22 2004
exp2 std1h
SAMPLE
date Oct 29 2004
solvent CDC13
file exp
ACQUISITION
instrum m400
probe asw5
seqfil s2pul
sfrq 399.937
tn H1
at 2.562
np 65536
sw 12787.7
bs 8
tpwr 58
pw 2.8
d1 1.000
d2 0
tof 828.3
nt 16
ct 16
alock n
gain not used
FLAGS
il n
in nw
dp y
DEC. & VT
dn H1
dfrq 399.936
homo n
dpwr 30
dof 0.0
dm nnn
dmm c
dmf 200
PROCESSING
lb 0.40
wtfile
proc ft
fn 65536
DISPLAY
sp 263.0
wp 2928.9
vs 162
sc 65
wc 225
hzmm 13.02
is 680.76
rfl 3543.2
rfp 0
th 2.1
ins 100.000
rp 2.2
lp -188.0
nm ph

```

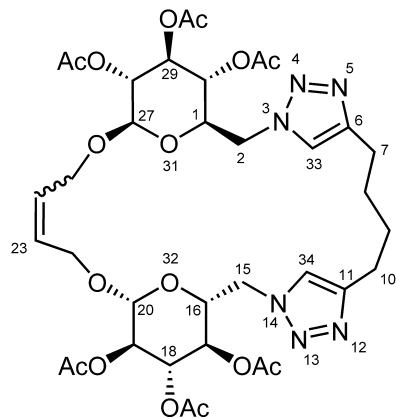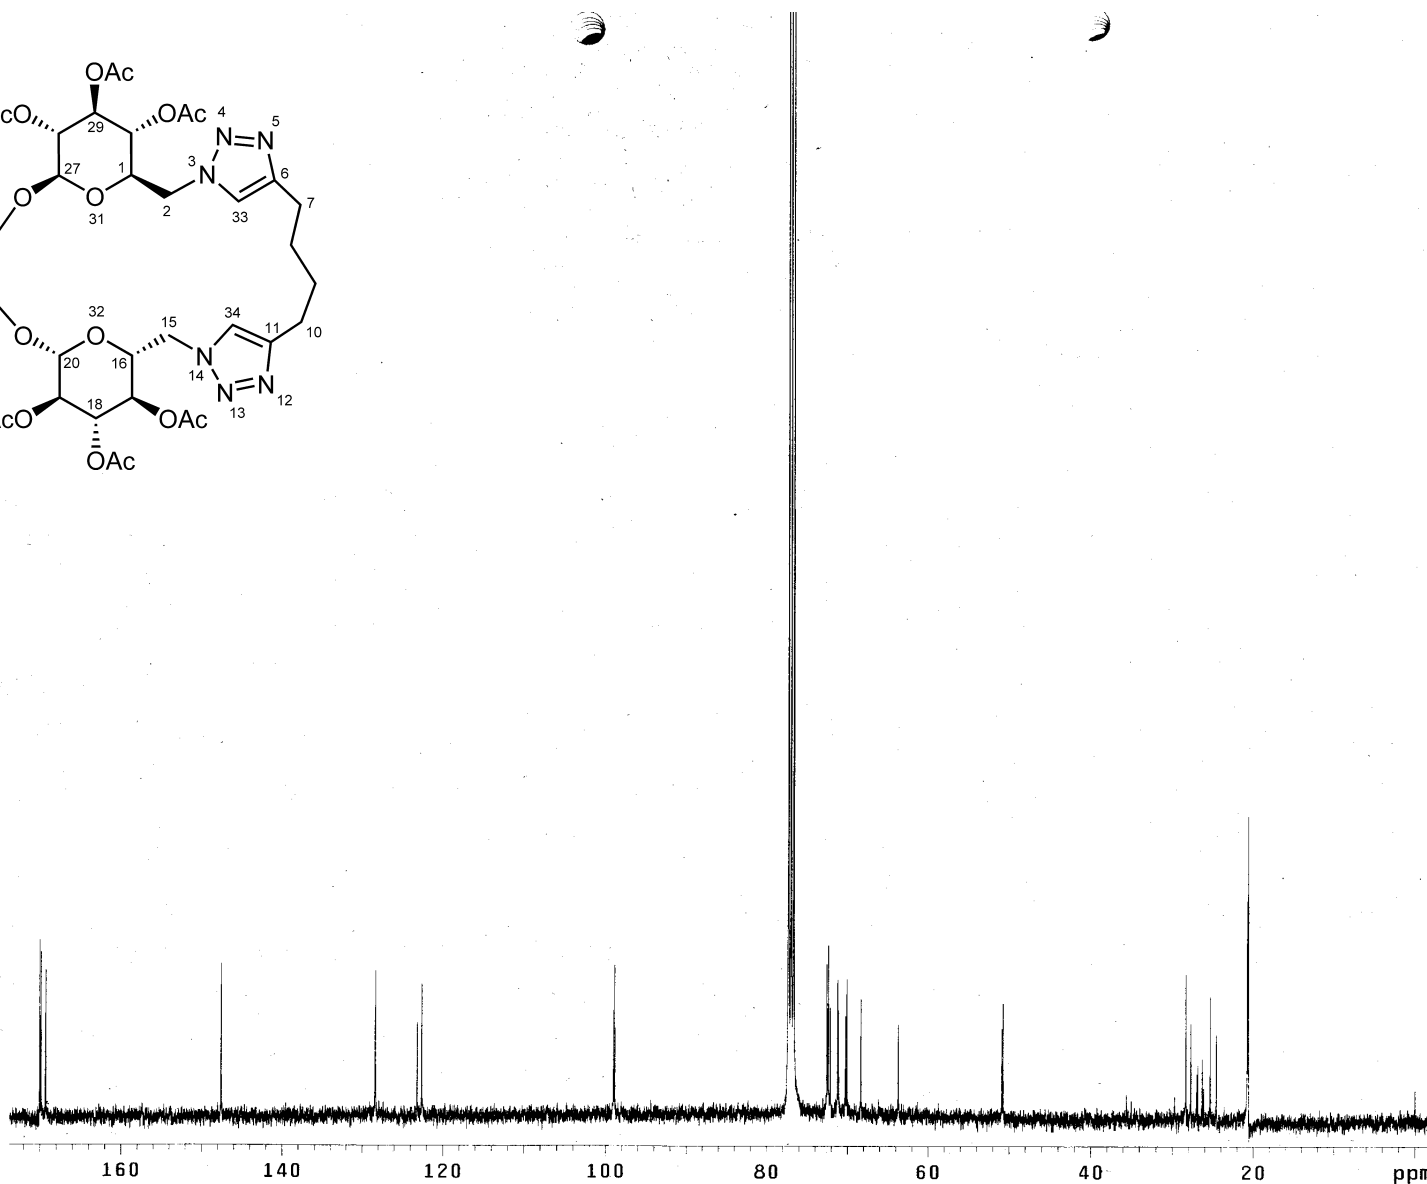

dos285.13C.cdc13  
 Fri Oct 29 18:07 2004

exp2 std13c

SAMPLE  
 date Oct 29 2004  
 solvent CDC13  
 file exp

ACQUISITION  
 instrum m400  
 probe asw5  
 seqfil s2pul  
 sfrq 100.574  
 tn C13  
 at 1.311  
 np 67216  
 sw 25641.0  
 bs 16  
 tpwr 61  
 pw 4.0  
 d1 1.689  
 d2 0  
 tof 1327.2  
 nt 15000  
 ct 15000  
 alock n  
 gain not used

FLAGS  
 il n  
 in n  
 dp y  
 DEC. & VT  
 dn H1  
 dfrq 399.936  
 homo n  
 dpwr 40  
 dof 0  
 dm yyy  
 dmm w  
 dmf 9350  
 pp 17.5  
 PROCESSING  
 lb 1.00  
 wtfile  
 proc ft  
 fn 65536

DISPLAY  
 sp -298.5  
 wp 17769.6  
 vs 926  
 sc 65  
 wc 225  
 hzmm 78.98  
 rfl 9740.8  
 rfp 7743.4  
 th 6.3  
 rp 68.0  
 lp -372.4  
 nm no ph

**(1*R*,16*R*,17*R*,18*R*,19*R*,20*R*,23(*E*,*Z*),27*R*,28*R*,29*R*,30*R*)-19,28-Bis[(trifluoroacetyl)amino]-21,26,31,32-tetraoxa-3,4,5,12,13,14-hexaazapentacyclo[25.3.1.1<sup>3,6</sup>.1<sup>11,14</sup>.1<sup>16,20</sup>]tetratriaconta-4,6(34),11(33),12,23-pentaene-17,18,29,30-tetrayl tetraacetate (19)**

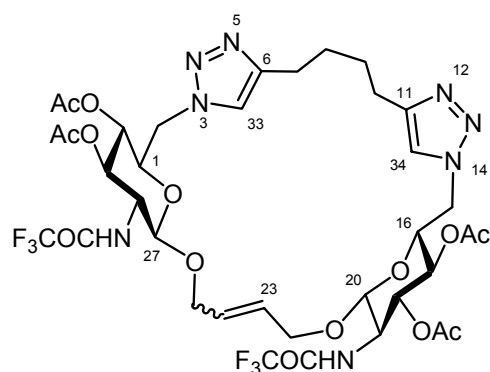

**<sup>1</sup>H-NMR** (400 MHz, CDCl<sub>3</sub>) isomer mixture: δ [ppm] = 1.56–1.68 (m, 4H), 1.88–1.95 (m, 6H), 1.98–2.09 (m, 6H), 2.57–2.69 (m, 4H), 3.70–4.06 (m, 8H), 4.34–4.66 (m, 6H), 4.76–4.90 (m, 2H), 5.00–5.40 (m, 4H), 7.78–7.87 (m, 2H), 9.55–9.69 (m, 2H).–

|                   |                                                                                  |                      |       |          |
|-------------------|----------------------------------------------------------------------------------|----------------------|-------|----------|
| <b>HRMS (ESI)</b> | C <sub>36</sub> H <sub>44</sub> F <sub>6</sub> N <sub>8</sub> O <sub>14</sub> Na | [M+Na <sup>+</sup> ] | calcd | 949.2773 |
|                   |                                                                                  |                      | found | 949.2773 |

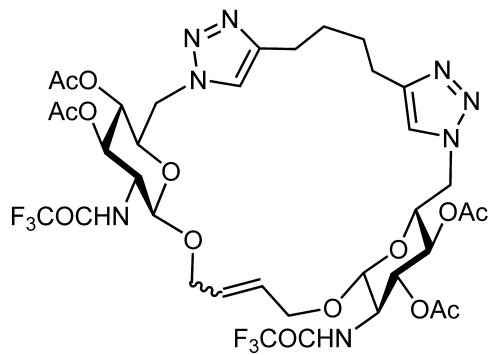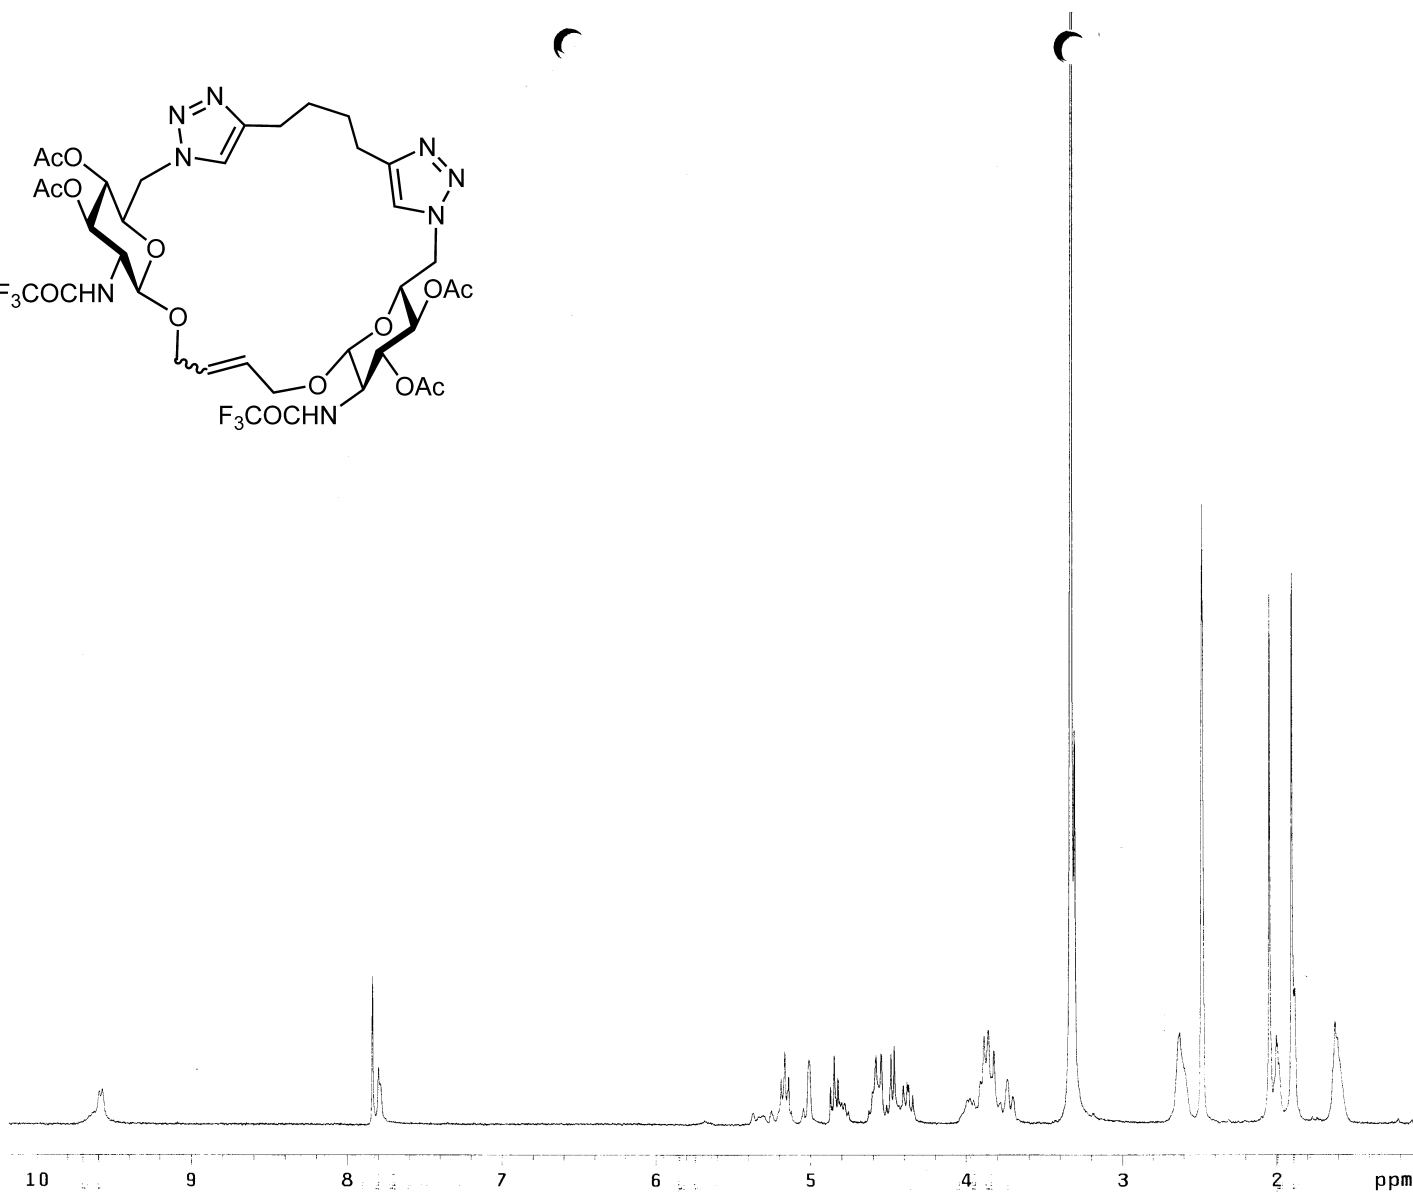

```

dos276.1H.dms0.dezember
Fri Dec 3 12:51 2004
exp7 std1h

SAMPLE
date Dec 3 2004
solvent DMSO
file exp
ACQUISITION
instrum m400
probe asw5
seqfil s2pul
sfrq 399.939
tn H1
at 2.562
np 65536
sw 12787.7
bs 8
tpwr 58
pw 2.8
d1 1.000
d2 0
tof 828.3
nt 16
ct 16
alock n
gain not used
FLAGS
il n
in nw
dp y
DEC. & VT
dn H1
dfrq 399.938
homo n
dpwr 30
dof 0.0
dm nnn
dmm c
dmf 200
PROCESSING
lb 0.40
wtfile
proc ft
fn 65536

DISPLAY
sp 430.4
wp 3642.7
vs 590
sc 65
wc 225
hzmm 16.19
rfl 3539.8
rfp 0
th 2.1
rp 23.3
lp -229.9
nm ph

```

(1*R*,16*R*,17*R*,18*R*,19*S*,20*R*,22(*E*; *Z*),25*R*,26*S*,27*R*,28*R*)-19,26-Bis(acetylamino)-29,30-dioxo-3,4,5,12,13,14-hexaazapentacyclo[23.3.1.1<sup>3,6</sup>.1<sup>11,14</sup>.1<sup>16,20</sup>]dotriaconta-4,6(32),11(31),12,22-pentaene-17,18,27,28-tetrayl tetraacetate (20)

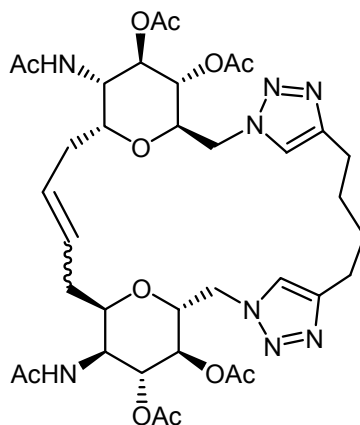

<sup>1</sup>H-NMR (400 MHz, CDCl<sub>3</sub>): δ [ppm] = 1.66–1.79 (m, 4H), 1.85–1.98 (m, 4H), 1.98–2.18 (m, 18H), 2.67–2.90 (m, 4H), 3.62–3.89 (m, 2H), 4.07–4.35 (m, 6H), 4.45–4.67 (m, 4H), 4.86–4.96 (m, 2H), 5.03–5.13 (m, 2H), 5.80–5.99 (m, 2H), 7.40 (s, 2H).–

|                   |                                                                   |                      |       |          |
|-------------------|-------------------------------------------------------------------|----------------------|-------|----------|
| <b>HRMS (ESI)</b> | C <sub>36</sub> H <sub>50</sub> N <sub>8</sub> O <sub>12</sub> Na | [M+Na <sup>+</sup> ] | calcd | 809.3440 |
|                   |                                                                   |                      | found | 809.3452 |



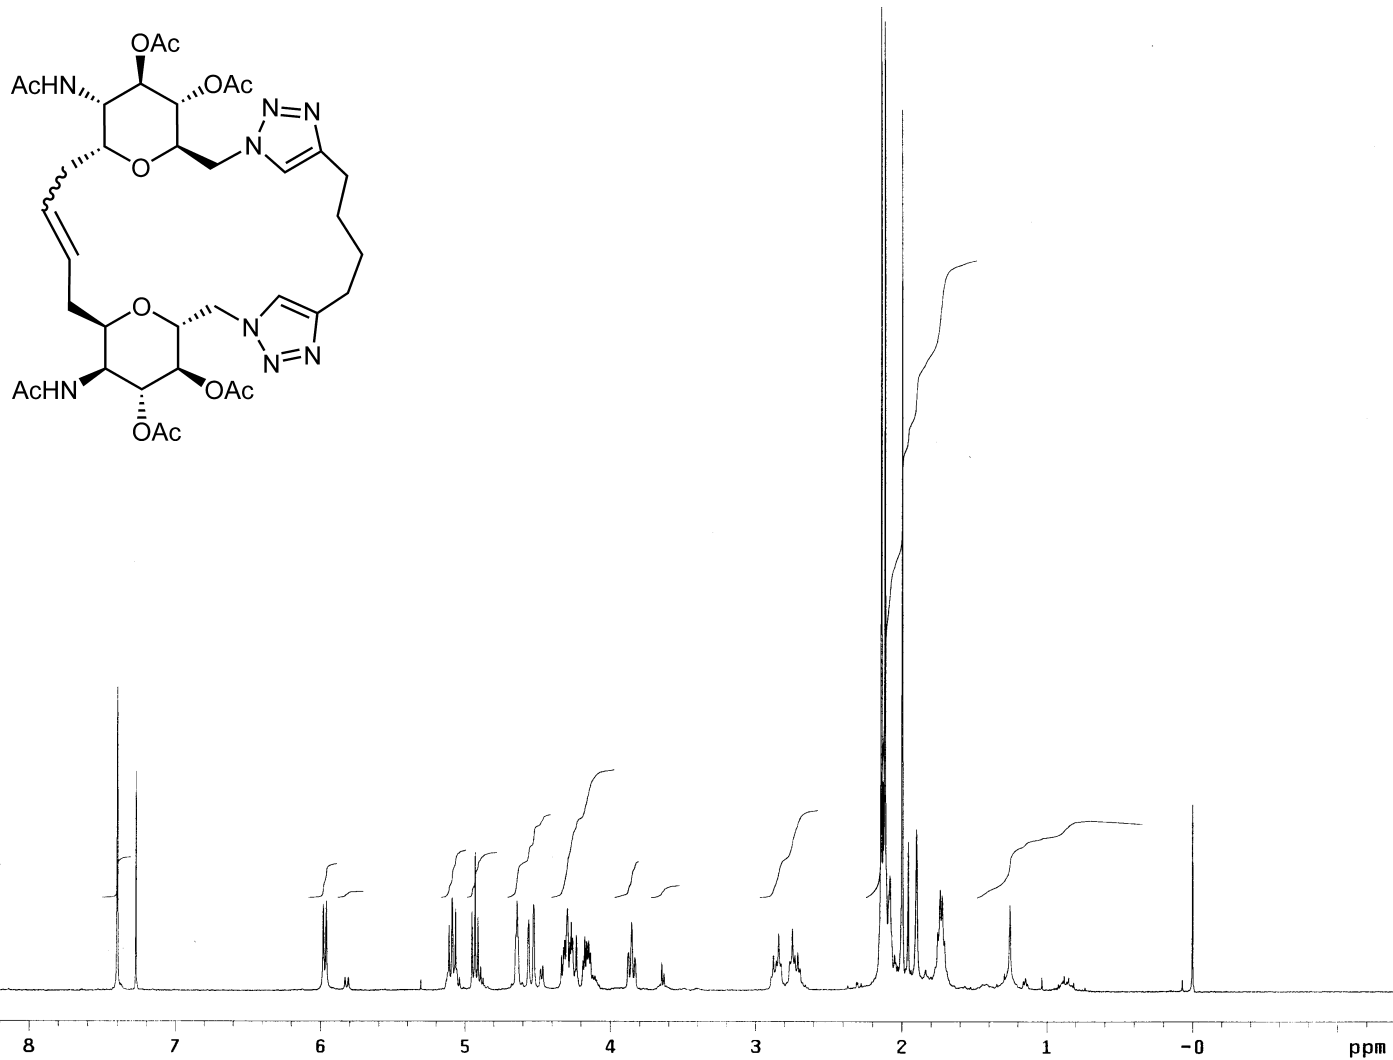

```

dos307.1H.cdc13
Mon Dec 6 17:17 2004
exp7 std1h

SAMPLE
date Dec 6 2004
solvent CDC13
file exp

ACQUISITION
instrum m400
probe asw5
seqfil s2pul
sfrq 399.937
tn H1
at 2.562
np 65536
sw 12787.7
bs 8
tpwr 58
pw 2.8
d1 1.000
d2 0
tof 828.3
nt 16
ct 16
alock n
gain not used

FLAGS
il n
in nw
dp y
DEC. & VT
dn H1
dfrq 399.936
homo n
dpwr 30
dof 0.0
dm nnn
dmm c
dmf 200

PROCESSING
lb 0.40
wtfile
proc ft
fn 65536

DISPLAY
sp -553.4
wp 3836.3
vs 162
sc 65
wc 225
hzmm 17.05
is 913.12
rf1 3542.0
rfp 0
th 2.1
ins 100.000
rp 5.7
lp -193.3
nm ph

```

**(3*R*,5*S*,6*R*,7*S*,8*R*,14(*E*;Z),21*R*,22*S*,23*R*,24*S*,26*R*)-6,7,22,23-Retrakis(benzyloxy)-5,24-dimethoxy-4,9,20,25-tetraoxa-1,28,29,30,37,38-hexaazapentacyclo[34.2.1.1<sup>28,31</sup>.0<sup>3,8</sup>.0<sup>21,26</sup>]-tetraconta-14,29,31(40),36(39),37-pentaene (21)**

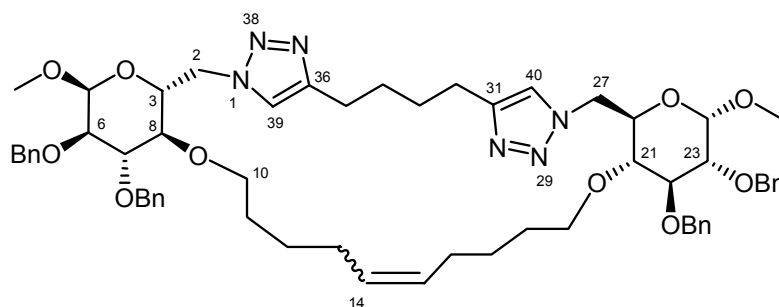

**<sup>1</sup>H-NMR** (400 MHz, CD<sub>3</sub>OD) isomer mixture: δ [ppm] = 1.33–1.74 (m, 16H), 1.96–2.03 (bs, 4H), 2.67–2.76 (m, 4H), 2.95–3.02 (m, 2H), 3.16 (s, 6H, CH<sub>3</sub>), 3.37–3.43 (m, 2H), 3.50–3.61 (m, 2H), 3.85–3.94 (m, 6H), 4.48–4.55 (m, 4H), 4.60 (d, *J* = 12.1 Hz, 2H), 4.75 (d, *J* = 10.2 Hz, 2H), 4.94 (d, *J* = 10.9 Hz, 2H), 5.39 (bt, *J* = 3.5 Hz, 2H, 14-H), 7.28–7.36 (m, 20H, CH arom.).–

**<sup>13</sup>C-NMR** (100 MHz, CD<sub>3</sub>OD) major isomer: δ [ppm] = 25.12, 26.14, 28.43, 29.96, 32.46 (t, C-11–C-13, C-32, C-33), 50.78 (t, C-2), 55.12 (q, CH<sub>3</sub>), 69.36 (d, CH), 73.44 (t, C-10), 75.69, 75.71 (t, CH<sub>2(Bn)</sub>), 78.85, 79.64, 81.79, 97.88 (d, CH), 121.61 (d, C-39), 127.59, 127.85, 127.93, 128.31, 128.35 (d, CH arom.), 130.10 (d, C-14), 137.81, 138.31 (s, C arom.), 147.53 (s, C-31).–

**HRMS (ESI)** C<sub>60</sub>H<sub>76</sub>N<sub>6</sub>O<sub>10</sub>Na [M+Na<sup>+</sup>] calcd 1063.5515  
found 1063.5509

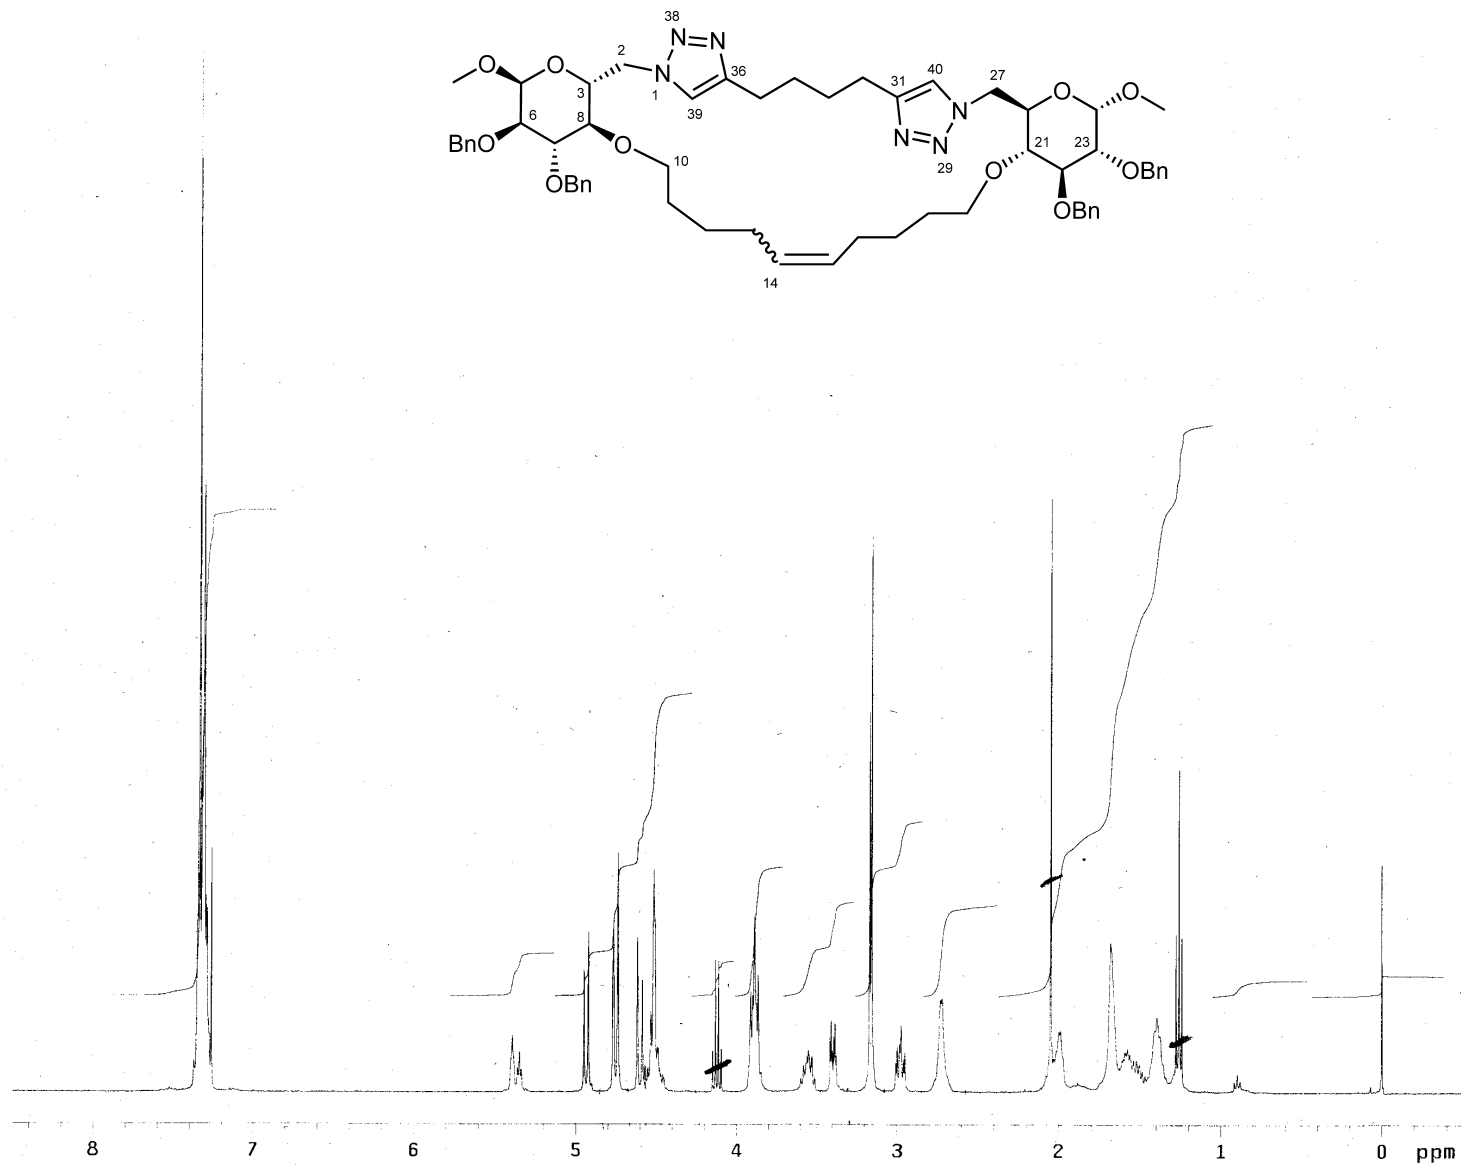

```

dos293.1H.cdc13
Wed Nov 10 14:12 2004
exp3 std1h

SAMPLE
date Nov 10 2004
solvent CDC13
file exp

ACQUISITION
instrum m400
probe asw5
seqfil s2pul
sfrq 399.937
tn H1
at 2.562
np 65536
sw 12787.7
bs 8
tpwr 58
pw 2.8
d1 1.000
d2 0
tof 828.3
nt 16
ct 16
alock n
gain not used

FLAGS
il n
in nw
dp y

DEC. & VT
dn H1
dfrq 399.936
homo n
dpwr 30
dof 0.0
dm nnn
dmm c
dmf 200

PROCESSING
lb 0.40
wtfile
proc ft
fn 65536

DISPLAY
sp -200.2
wp 3599.4
vs 162
sc 65
wc 225
hzmm 16.00
is 1007.15
rf1 3545.5
rfp 0
th 2.1
ins 100.000
rp -1.6
lp -185.3
nm ph

```

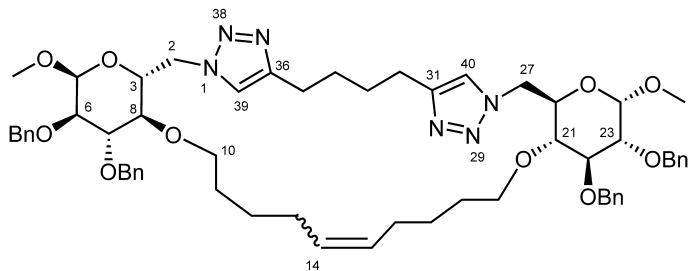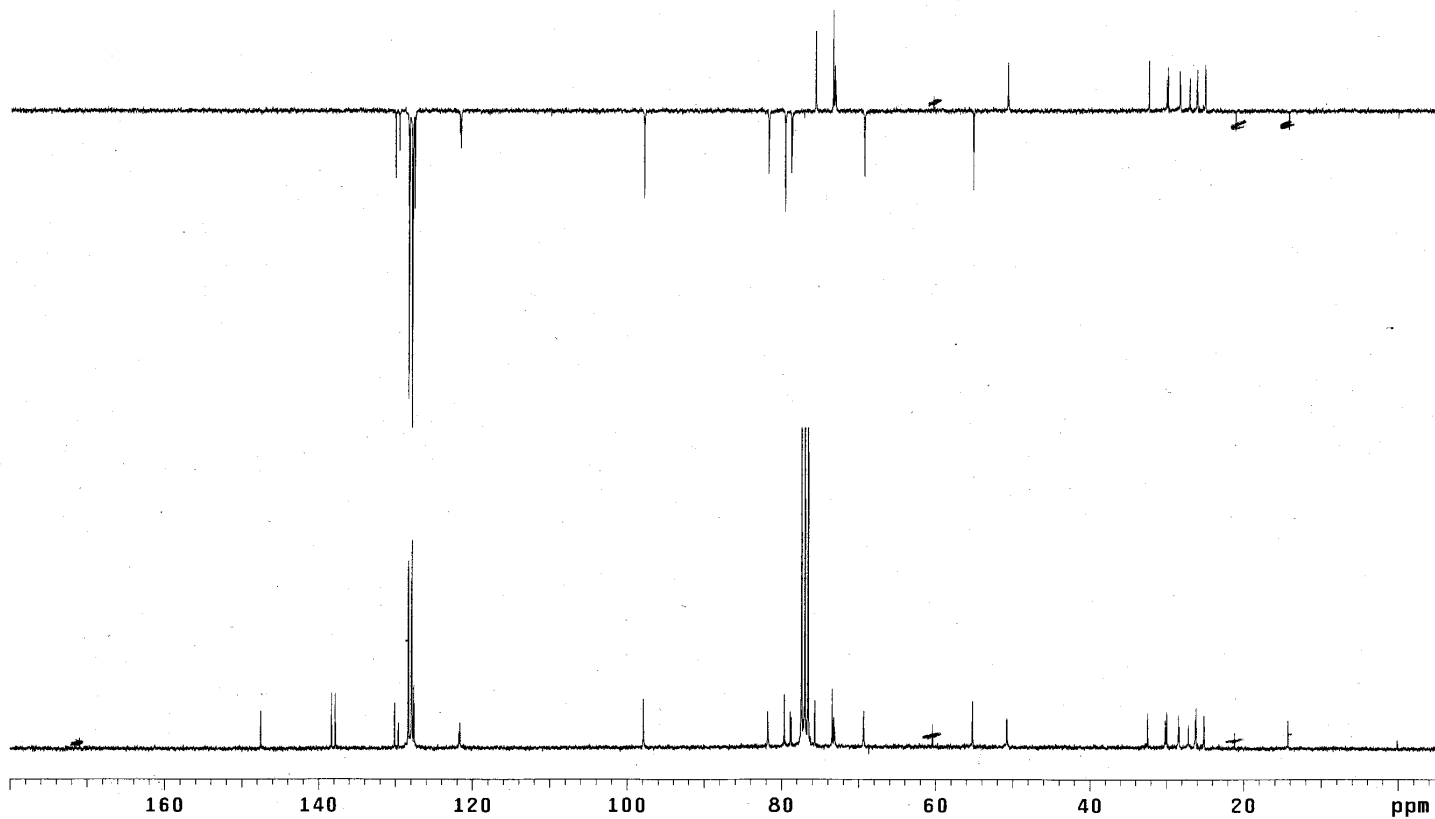

DOS293/CDC13/13C  
 Doerner 101104\_05  
 DEPT-135  
 Thu Nov 11 02:49 2004

exp7 dept

SAMPLE  
 date Nov 10 2004  
 solvent CDC13  
 file exp

ACQUISITION  
 instrum g300  
 probe atb5  
 seqfil dept  
 sfrq 75.500  
 tn C13  
 at 1.747  
 np 65906  
 sw 18867.9  
 bs 16  
 tpwr 56  
 pw 9.6  
 d1 2.000  
 d2 0  
 tof 767.8  
 nt 600  
 ct 600  
 alock n  
 gain not used  
 pp 16.2  
 pp1v1 56  
 J 140.0  
 mult 1.5  
 satdly 0

FLAGS

il n  
 in n

DEC. & VT

dn H1  
 dfrq 300.225  
 homo n  
 dpwr 37  
 dof 0  
 dm nny  
 dmm ccw  
 dmf 7900  
 pp1v1 56  
 pp 16.2  
 J 140.0

PROCESSING

lb 1.00  
 wtfile  
 proc ft  
 fn 65536

wexp procplot

DISPLAY

sp -377.8  
 wp 13967.1  
 vs 50  
 sc 65  
 wc 225  
 hzmm 62.08  
 rfl 1135.6  
 rfp 0  
 th 2.0  
 rp 241.3  
 lp -274.9  
 nm no ph

**(1*R*,16*R*,17*R*,18*S*,19*R*,20*R*,27*R*,28*R*,29*S*,30*R*)-21,26,31,32-Tetraoxa-3,4,5,12,13,14-hexaazapentacyclo[25.3.1.1<sup>3,6</sup>.1<sup>11,14</sup>.1<sup>16,20</sup>]tetratriaconta-4,6(34),11(33),12-tetraene-17,18,19,28,29,30-hexayl hexaacetate (18 reduced)**

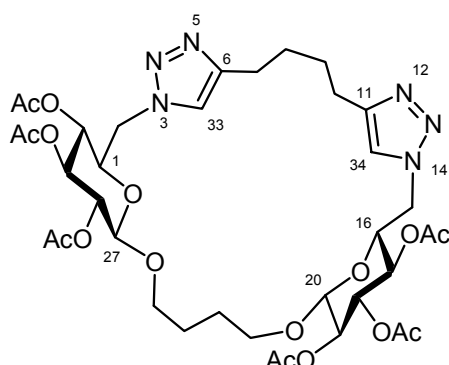

**<sup>1</sup>H-NMR** (400 MHz, CDCl<sub>3</sub>): δ [ppm] = 1.47 (bs, 4H, 23-H) 1.64–1.80 (m, 4H, 8-H) 2.01 (s, 3H, 18-CH<sub>3(Ac)</sub>), 2.03 (s, 3H, 19-CH<sub>3(Ac)</sub>), 2.12 (s, 3H, 17-CH<sub>3(Ac)</sub>), 2.71–2.78 (m, 2H, 7-H<sup>a</sup>), 2.78–2.86 (m, 2H, 7-H<sup>b</sup>), 3.42–3.48 (m, 2H, 22-H<sup>a</sup>), 3.52–3.58 (m, 2H, 22-H<sup>b</sup>), 3.93 (ddd, *J* = 9.6, 8.8, 2.8 Hz, 2H, 1-H), 4.32 (dd, *J* = 14.5, 8.8 Hz, 2H, 2-H<sup>a</sup>), 4.40 (d, *J* = 8.2 Hz, 2H, 20-H), 4.60 (dd, *J* = 14.5, 2.8 Hz, 2H, 2-H<sup>b</sup>), 4.87 (dd, *J* = 9.6, 9.2 Hz, 2H, 17-H), 4.94 (dd, *J* = 9.8, 8.2 Hz, 2H, 19-H), 5.24 (dd, *J* = 9.8, 9.2 Hz, 2H, 18-H), 7.37 (s, 2H, 33-H).–

**<sup>13</sup>C-NMR** (100 MHz, CDCl<sub>3</sub>): δ [ppm] = 20.58 (q, CH<sub>3(Ac)</sub>-18), 20.63 (q, CH<sub>3(Ac)</sub>-19), 20.69 (q, CH<sub>3(Ac)</sub>-17), 25.21 (t, C-7), 26.03 (t, C-23), 28.16 (t, C-8), 50.51 (t, C-2), 69.65 (t, C-22), 69.86 (d, C-17), 71.13 (d, C-19), 72.12 (d, C-16), 72.38 (d, 18), 100.59 (d, C-20), 122.32 (d, C-33), 147.77 (s, C-6), 169.34 (s, CO-19), 169.74 (s, CO-17), 170.10 (s, CO-18).–

|                   |                                                                   |                      |       |          |
|-------------------|-------------------------------------------------------------------|----------------------|-------|----------|
| <b>HRMS (ESI)</b> | C <sub>36</sub> H <sub>50</sub> N <sub>6</sub> O <sub>16</sub> Na | [M+Na <sup>+</sup> ] | calcd | 845.3176 |
|                   |                                                                   |                      | found | 845.3175 |

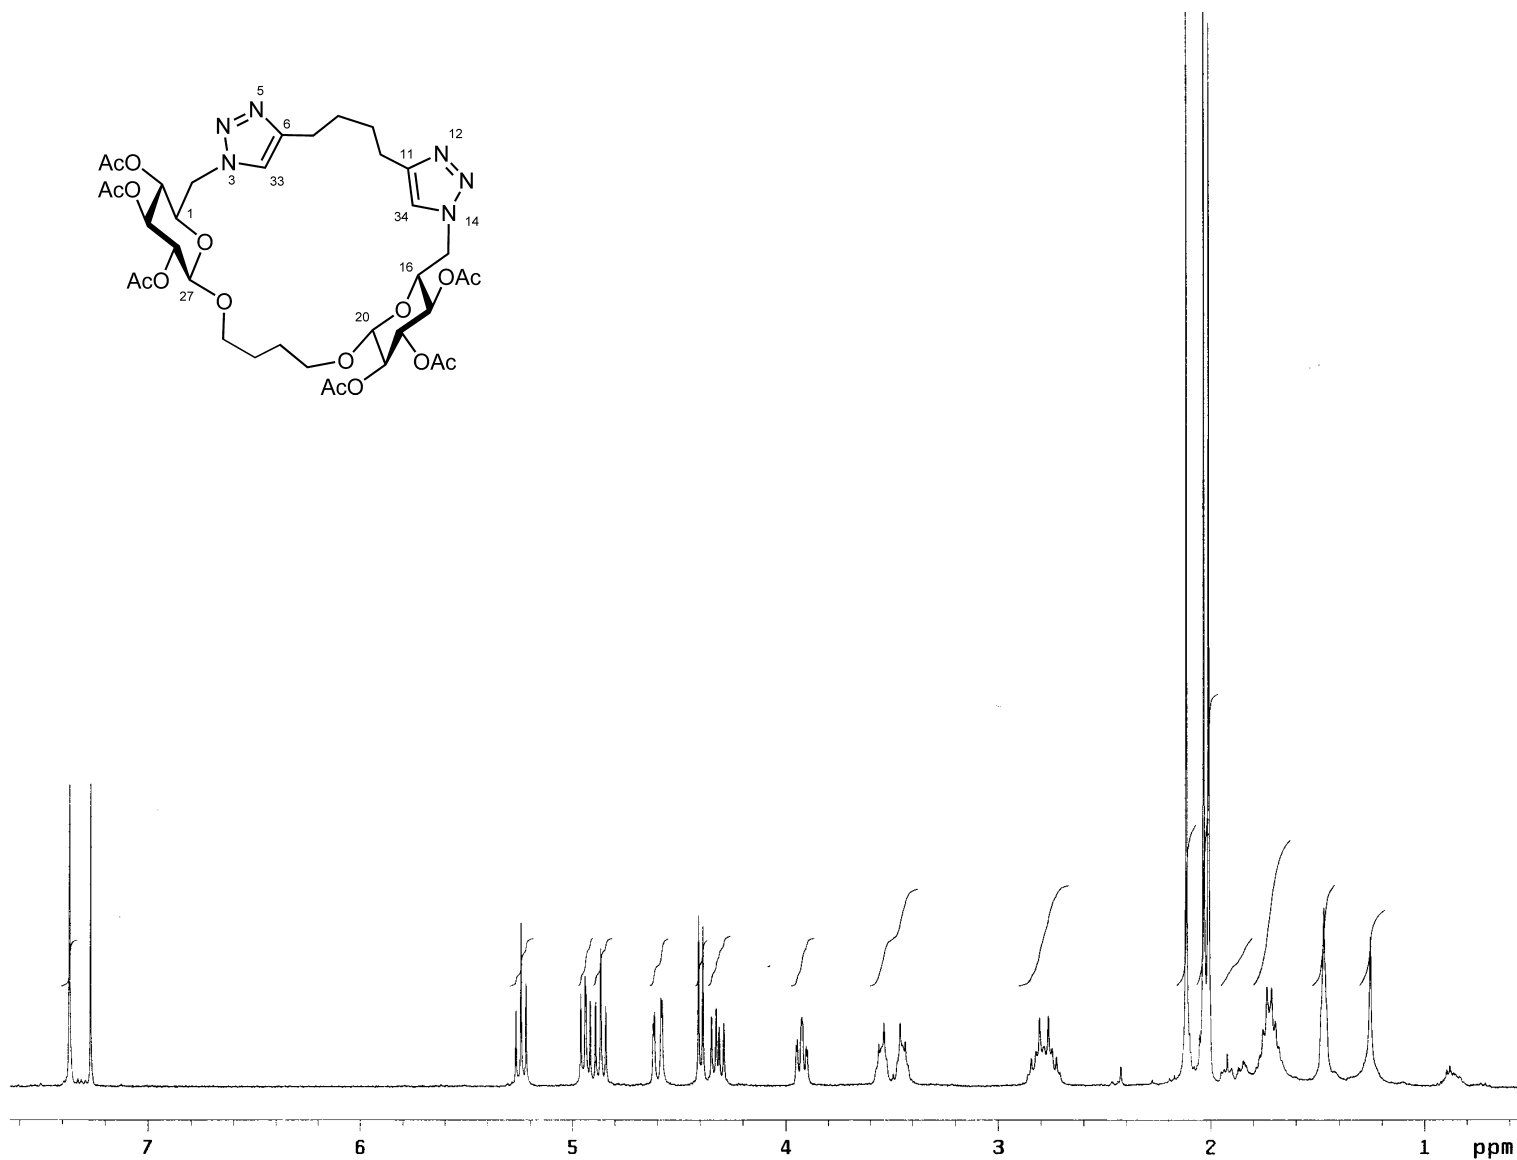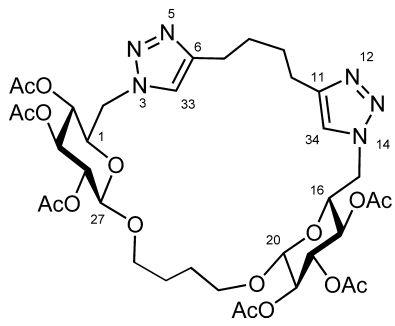

```

dos294II.1H.cdc13
Wed Nov 24 20:03 2004
exp1 stdih
SAMPLE
date Nov 24 2004
solvent CDC13
file exp
ACQUISITION
instrum m400
probe .asw5
seqfil s2pul
sfrq 399.937
tn H1
at 2.562
np 65536
sw 12787.7
bs 8
tpwr 58
pw 2.8
d1 1.000
d2 0
tof 828.3
nt 16
ct 16
alock n
gain not used
FLAGS
il n
in nw
dp y
DEC. & VT
dn H1
dfrq 399.936
homo n
dpwr 30
dof 0.0
dm nnn
dmm c
dmf 200
PROCESSING
lb 0.30
wtfile
proc ft
fn 131072
DISPLAY
sp 218.3
wp 2839.9
vs 162
sc 65
wc 225
hzmm 12.62
is 640.99
rf1 3543.6
rfp 0
th 2.1
ins 1.000
rp 11.3
lp -202.9
nm ph

```

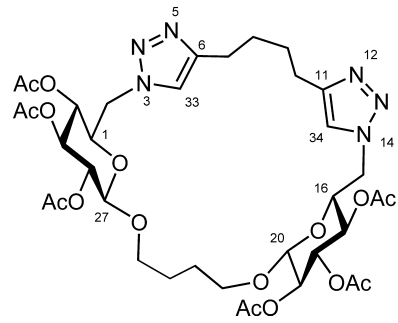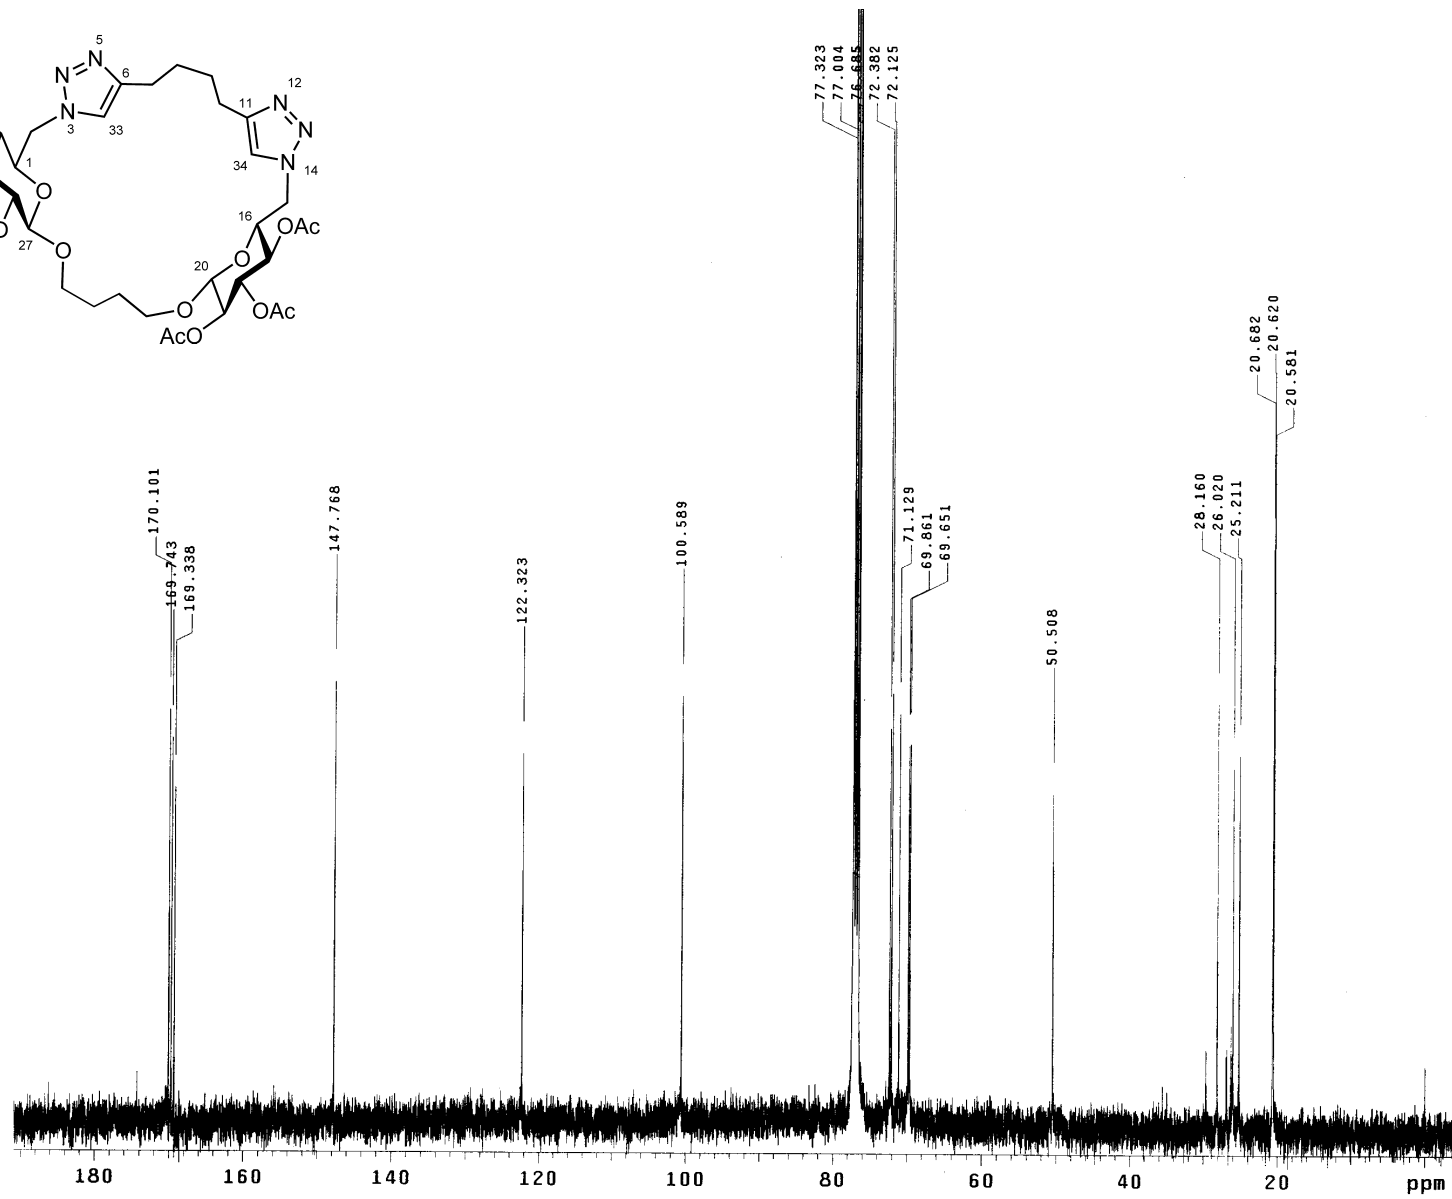

dos294.13C.cdc13  
Wed Nov 24 20:22 200

exp2 std13c

SAMPLE  
date Nov 24 2004  
solvent CDC13  
file exp

ACQUISITION  
instrum m400  
probe asw5  
seqfil s2pul  
sfrq 100.574  
tn C13  
at 1.311  
np 67216  
sw 25641.0  
bs 16  
tpwr 61  
pw 4.0  
d1 1.689  
d2 0  
tof 1327.2  
nt 9000  
ct 9000  
alock n  
gain not used

FLAGS  
il n  
in n  
dp y

DEC. & VT  
dn H1  
dfrq 399.936  
homo n  
dpwr 40  
dof 0  
dm yyy  
dmm w  
dmf 9350  
pp 17.5

PROCESSING  
lb 1.00  
wtfile  
proc ft  
fn 65536

DISPLAY  
sp -388.2  
wp 19588.2  
vs 1800  
sc 65  
wc 225  
h2mm 87.06  
rf1 9741.3  
rfp 7743.4  
th 20.0  
rp 30.6  
lp -282.9  
nm no ph

**(1*R*,16*R*,17*S*,18*S*,19*R*,20*R*,27*R*,28*R*,29*S*,30*S*)-21,26,31,32-Tetraoxa-3,4,5,12,13,14-hexaazapentacyclo[25.3.1.1<sup>3,6</sup>.1<sup>11,14</sup>.1<sup>16,20</sup>]tetratriaconta-4,6(34),11(33),12-tetraene-17,18,19,28,29,30-hexol (22)**

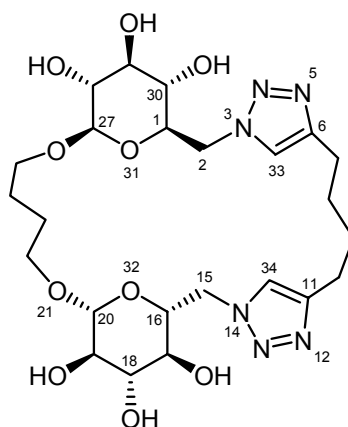

**<sup>1</sup>H-NMR** (400 MHz, CD<sub>3</sub>OD): δ [ppm] = 1.47–1.59 (bs, 4H), 1.65–1.74 (bs, 4H), 2.69–2.79 (bs, 4H), 3.13 (q, *J* = 9.2 Hz, 4H) 3.35–3.39 (m, 2H), 3.46–3.53 (m, 2H), 3.55–3.65 (m, 4H), 4.19 (d, *J* = 7.8 Hz, 2H), 4.46 (dd, *J* = 14.1, 8.6 Hz, 2H), 4.81 (dd, *J* = 14.1, 2.3 Hz, 2H), 7.73 (s, 2H).–

**<sup>13</sup>C-NMR** (100 MHz, CD<sub>3</sub>OD): δ [ppm] = 25.85, 27.62, 29.47 (t, C-7, C-8, C-24), 52.41 (t, C-2), 70.79 (t, C-25), 72.95, 74.95, 75.39, 77.74 (d, C-1, C-28–C-30), 104.39 (d, C-27), 124.20 (d, C-33), 148.28 (s, C-6).–

|                   |                                                                   |                      |       |          |
|-------------------|-------------------------------------------------------------------|----------------------|-------|----------|
| <b>HRMS (ESI)</b> | C <sub>24</sub> H <sub>38</sub> N <sub>6</sub> O <sub>10</sub> Na | [M+Na <sup>+</sup> ] | calcd | 593.2542 |
|                   |                                                                   |                      | found | 593.2546 |



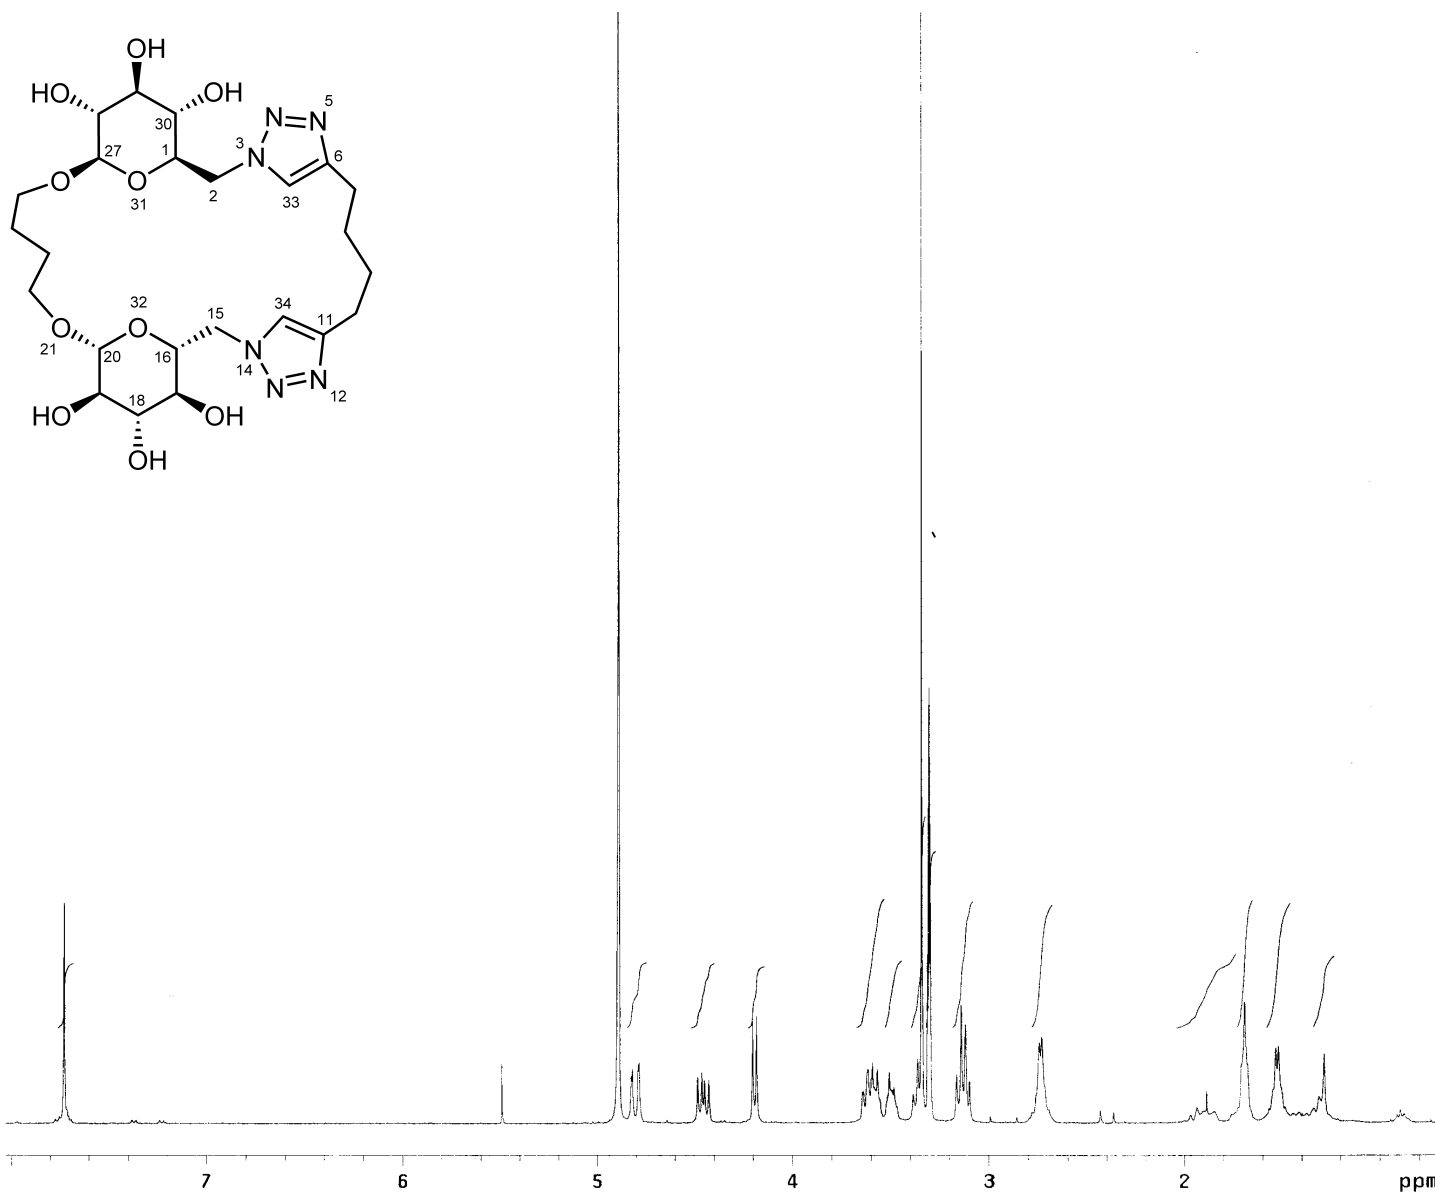

```

dos304.1H.meod
Thu Nov 25 18:34 2004
exp7 std1h
SAMPLE
date Nov 25 2004
solvent CD30D
file exp
ACQUISITION
instrum m400
probe asw5
seqfil s2pul
sfrq 399.939
tn H1
at 2.562
np 65536
sw 12787.7
bs 8
tpwr 58
pw 2.8
d1 1.000
d2 0
tof 828.3
nt 16
ct 16
alock n
gain not used
FLAGS
il n
in nw
dp y
DEC. & VT
dn H1
dfrq 399.938
homo n
dpwr 30
dof 0.0
dm nnn
dmm c
dmf 200
PROCESSING
lb 0.40
wtfile
proc ft
fn 65536
DISPLAY
sp 267.3
wp 2944.1
vs 341
sc 65
wc 225
hzmm 13.09
is 1269.21
rfl 3538.9
rfp 0
th 2.9
ins 100.000
rp 6.3
lp -187.9
nm ph

```

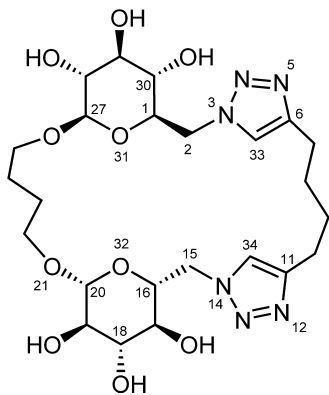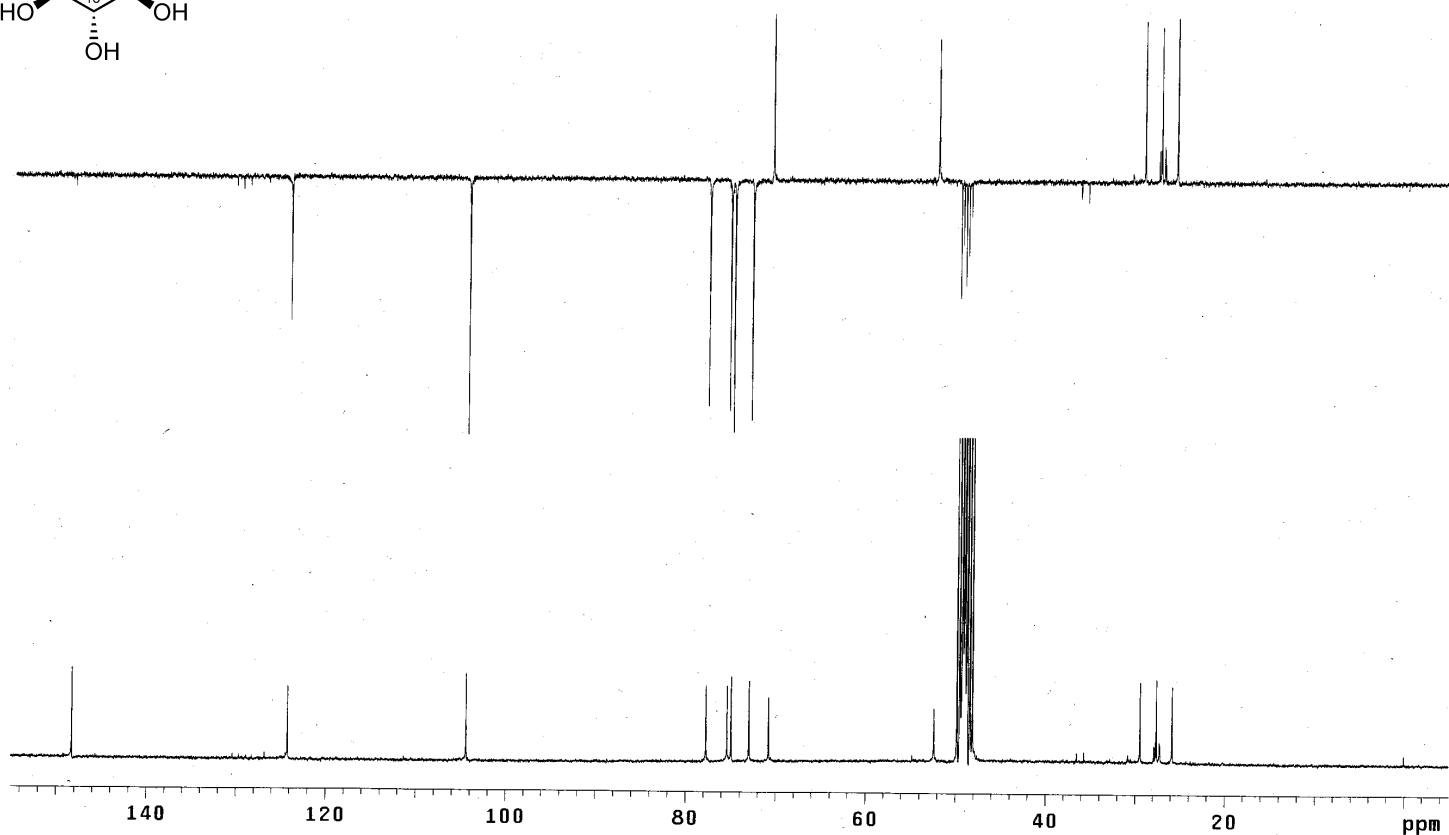

DOS304/CD300/13C  
 Doerner 261104\_01  
 DEPT-135  
 Sun Nov 28 07:08 2004

exp9 dept

SAMPLE  
 date Nov 26 2004  
 solvent CD30D  
 file exp

ACQUISITION  
 instrum g300  
 probe\_ atb5  
 seqfil dept  
 sfrq 75.500  
 tn C13  
 at 1.747  
 np 65906  
 sw 18867.9  
 bs 16  
 tpwr 56  
 pw 9.6  
 d1 2.000  
 d2 0  
 tof 767.8  
 nt 25000  
 ct 25000  
 alock n  
 gain not used  
 pp 16.2  
 pplvl 56  
 J 140.0  
 mult 1.5  
 satdly 0

FLAGS  
 il n  
 in n

DEC. & VT  
 dn H1  
 dfrq 300.226  
 homo n  
 dpwr 37  
 dof 0  
 dm nny  
 dmm ccw  
 dmf 790  
 pplvl 56  
 pp 16.2  
 J 140.0

PROCESSING  
 lb 1.00  
 wtfile  
 proc ft  
 fn 65536

wexp procplot  
 DISPLAY  
 sp -378.0  
 wp 12079.6  
 vs 40  
 sc 65  
 wc 225  
 hzmm 53.69  
 rfl 1030.4  
 rfp 0  
 th 3.0  
 rp 311.5  
 lp -219.2  
 nm no ph



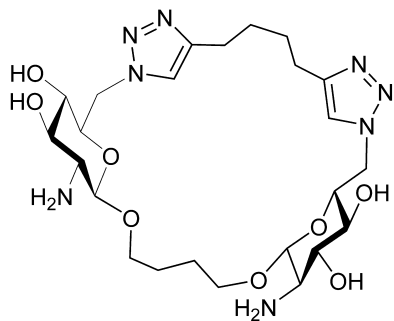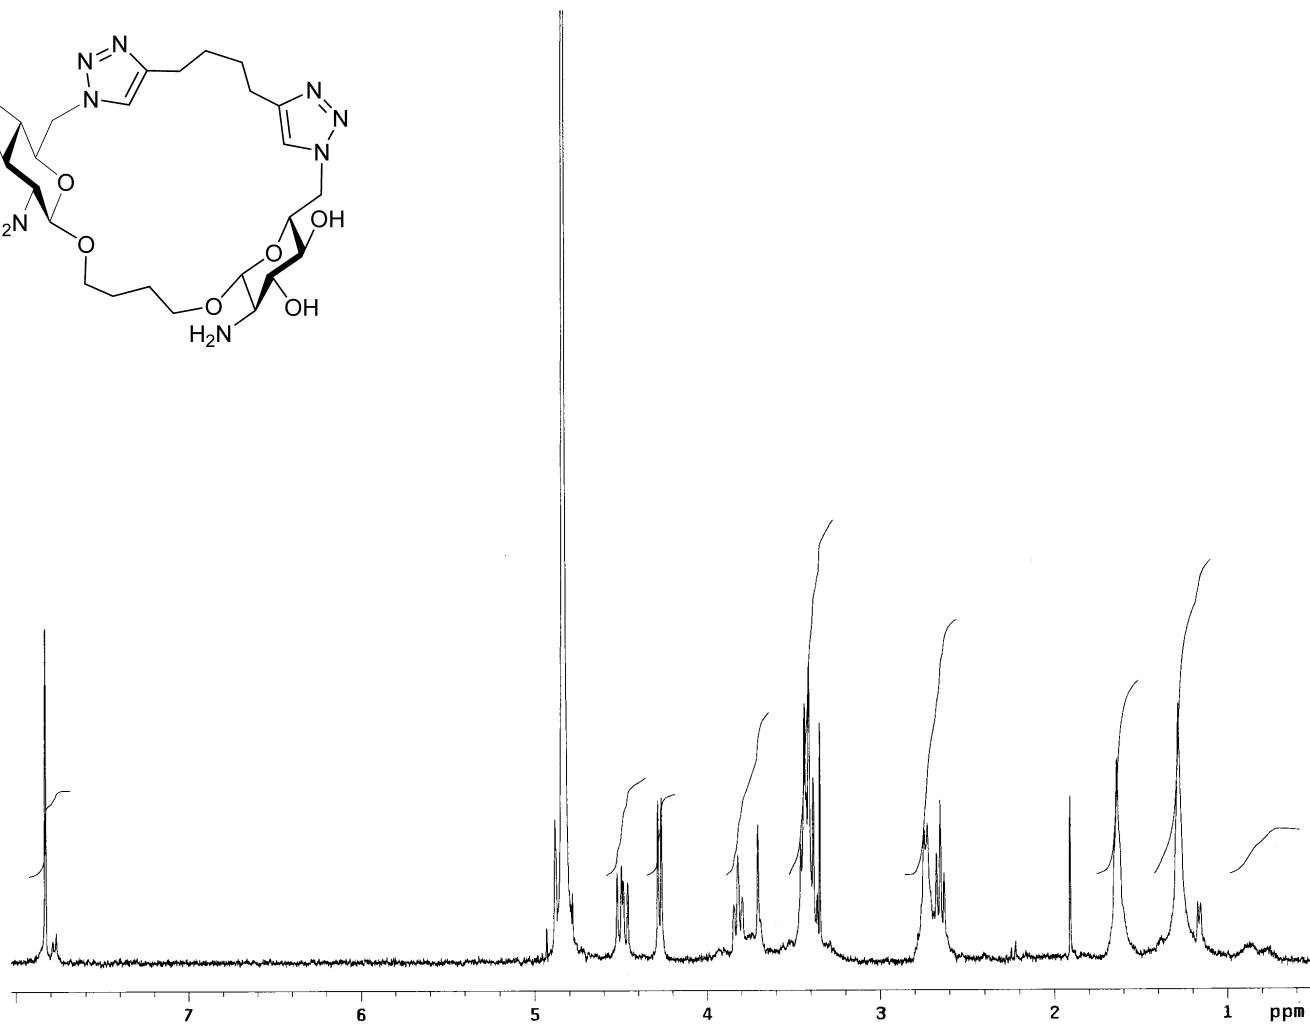

1H Standard-Parameter

Tue Feb 15 15:50 2005

expB stdih

SAMPLE  
date Feb 15 2005  
solvent D2O  
file exp

ACQUISITION  
instrum m400  
probe asw5  
seqf11 s2pu1  
sfrq 399.938  
tn H1  
at 2.562  
np 65536  
sw 12787.7  
bs 8  
tpwr 58  
pw 2.8  
d1 1.000  
d2 0  
tof 828.3  
nt 40  
ct 40  
alock n  
gain not used

FLAGS  
f1 n  
f2 nw  
dp y

DEC. & VT  
dn H1  
dfrq 399.937  
homo n  
dpwr 30  
dof 0.0  
dm hnn  
dmm c  
dmf 200

PROCESSING  
lb 0.40  
wtfile  
proc ft  
fn 65536

DISPLAY  
sp 206.7  
wp 3003.5  
vs 5048  
sc 65  
wc 225  
hzmm 13.35  
fs 5849.41  
rf1 5397.0  
rfp 1931.7  
th 2.1  
ins 1.000  
rp -25.7  
lp -115.8  
nm ph

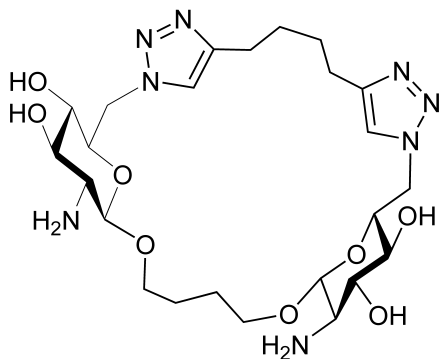

dos330.13C.d2o  
 Mon Feb 7 19:32 2005

exp9 std13c

SAMPLE  
 date Feb 7 2005  
 solvent D2O  
 file exp

ACQUISITION  
 instrum m400  
 probe asw5  
 seqfil s2pul  
 sfrq 100.575  
 tn C13  
 at 1.311  
 np 67216  
 sw 25641.0  
 bs 16  
 tpwr 61  
 pw 4.0  
 d1 1.689  
 d2 0  
 tof 1327.2  
 nt 18000  
 ct 16064  
 alock n  
 gain not used

FLAGS  
 il n  
 in nw  
 dp y

DEC. & VT  
 dn H1  
 dfrq 399.937  
 homo n  
 dpwr 40  
 dof 0  
 dm yyy  
 dmm w  
 dmf 9350  
 pp 17.5

PROCESSING  
 lb 1.00  
 wtfile  
 proc ft  
 fn 65536

DISPLAY  
 sp 1496.0  
 wp 17512.1  
 vs 11  
 sc 65  
 wc 225  
 hzmm 77.83  
 rfl 1970.6  
 rfp 0  
 th 5.8  
 rp -136.9  
 lp -288.0  
 nm no ph

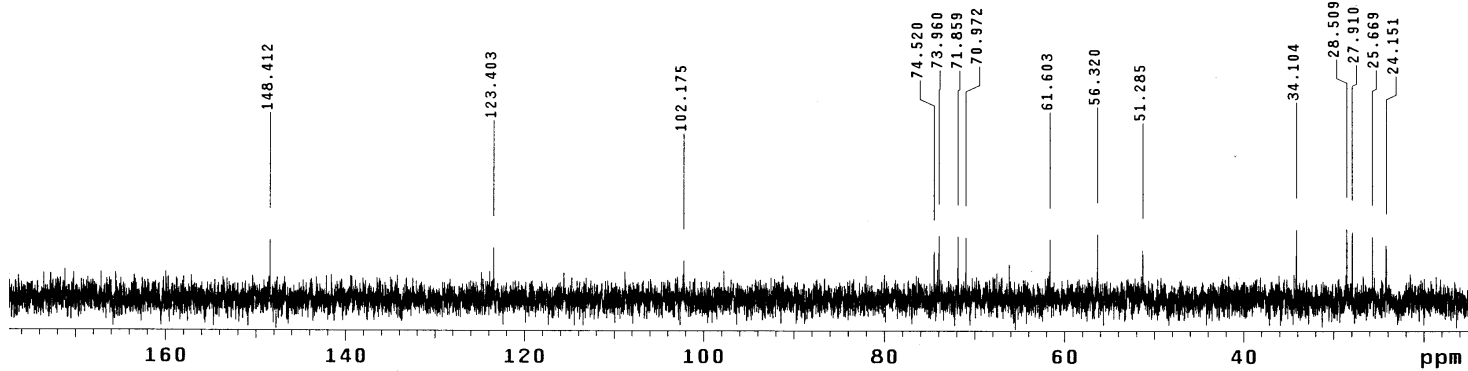

**(1*R*,16*R*,17*R*,18*R*,19*S*,20*R*,25*R*,26*S*,27*R*,28*R*)-19,26-Bis(acetylamino)-29,30-dioxo-3,4,5,12,13,14-hexaazapentacyclo[23.3.1.1<sup>3,6</sup>.1<sup>11,14</sup>.1<sup>16,20</sup>]dotriaconta-4,6(32),11(31),12-tetraene-17,18,27,28-tetrayl tetraacetate (20 reduced)**

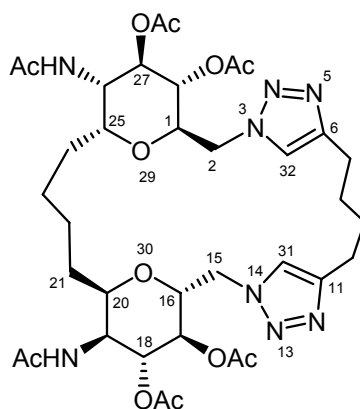

$$[\alpha]_{\text{D}}^{22} = +41.8 \quad (c = 0.225, \text{CHCl}_3)$$

**<sup>1</sup>H-NMR** (400 MHz, CDCl<sub>3</sub>): δ [ppm] = 0.80–0.91 (m, 4H), 1.22–1.34 (m, 4H), 1.68–1.76 (m, 4H), 1.99 (s, 6H, CH<sub>3</sub>(NHAc)), 2.11, 2.15 (s, 6H, CH<sub>3</sub>(OAc)), 1.66–1.88 (m, 4H), 3.89 (ddd, *J* = 10.5, 8.4, 2.5 Hz, 2H), 4.00–4.07 (m, 2H), 4.24–4.34 (m, 4H), 4.53 (dd, *J* = 14.2, 2.2 Hz, 2H), 4.92 (t, *J* = 8.2 Hz, 2H), 5.05 (dd, *J* = 9.6, 8.0 Hz, 2H), 5.84 (d, *J* = 7.8 Hz, 2H), 7.40 (s, 2H).–

**<sup>13</sup>C-NMR** (100 MHz, CDCl<sub>3</sub>): δ [ppm] = 20.80, 20.85, 23.08, 23.32, 25.12, 28.26, 29.67, 50.58, 51.72, 69.56, 70.31, 70.62, 72.35 (d, C-1, C-25), 122.32 (d, C-32), 147.66 (s, C-6), 169.62, 169.87, 171.72 (s, CO).–

|                   |                                                                   |                      |       |          |
|-------------------|-------------------------------------------------------------------|----------------------|-------|----------|
| <b>HRMS (ESI)</b> | C <sub>36</sub> H <sub>52</sub> N <sub>8</sub> O <sub>12</sub> Na | [M+Na <sup>+</sup> ] | calcd | 811.3597 |
|                   |                                                                   |                      | found | 811.3613 |

dos308.1H.nS.cdc13

Wed Dec 15 21:06 2004

exp2 std1h

SAMPLE  
date Dec 15 2004  
solvent CDC13  
file exp

ACQUISITION  
instrum m400  
probe asw5  
seqfil s2pul  
sfrq 399.937  
tn H1  
at 2.562  
np 65536  
sw 12787.7  
bs 8  
tpwr 58  
pw 2.8  
d1 1.000  
d2 0  
tof 828.3  
nt 16  
ct 16  
alock n  
gain not used

FLAGS  
il n  
in nw  
dp y

DEC. & VT  
dn H1  
dfrq 399.936  
homo n  
dpwr 30  
dof 0.0  
dm nnn  
dmm c  
dmf 200

PROCESSING  
lb 0.40  
wtfile  
proc ft  
fn 65536

DISPLAY  
sp 70.6  
wp 3152.1  
vs 162  
sc 65  
wc 225  
hzmm 14.01  
is 1287.36  
rfl 3542.4  
rfp 0  
th 2.9  
ins 100.000  
rp -16.7  
lp -137.8  
nm ph

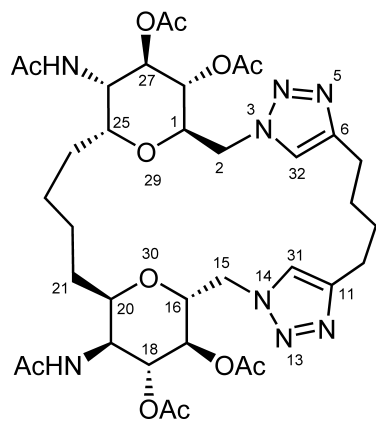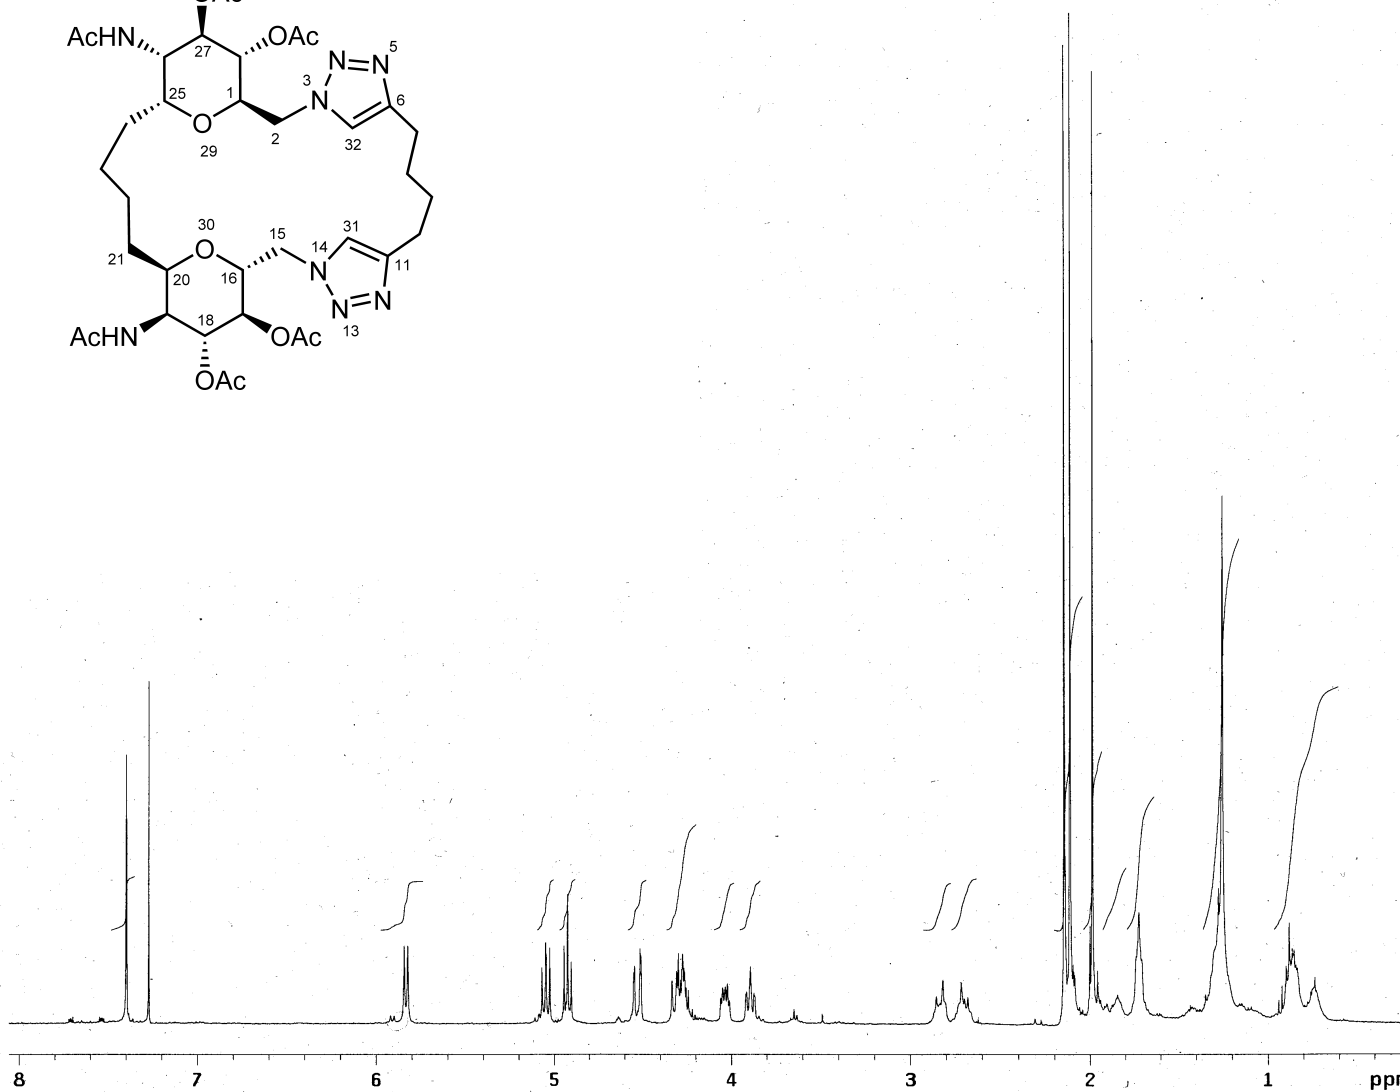

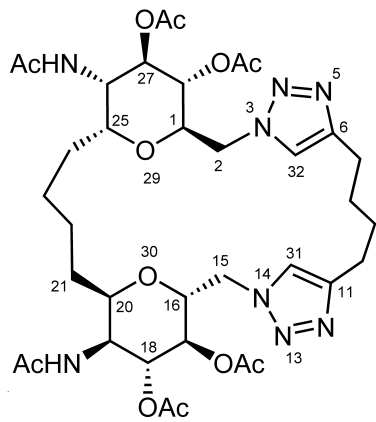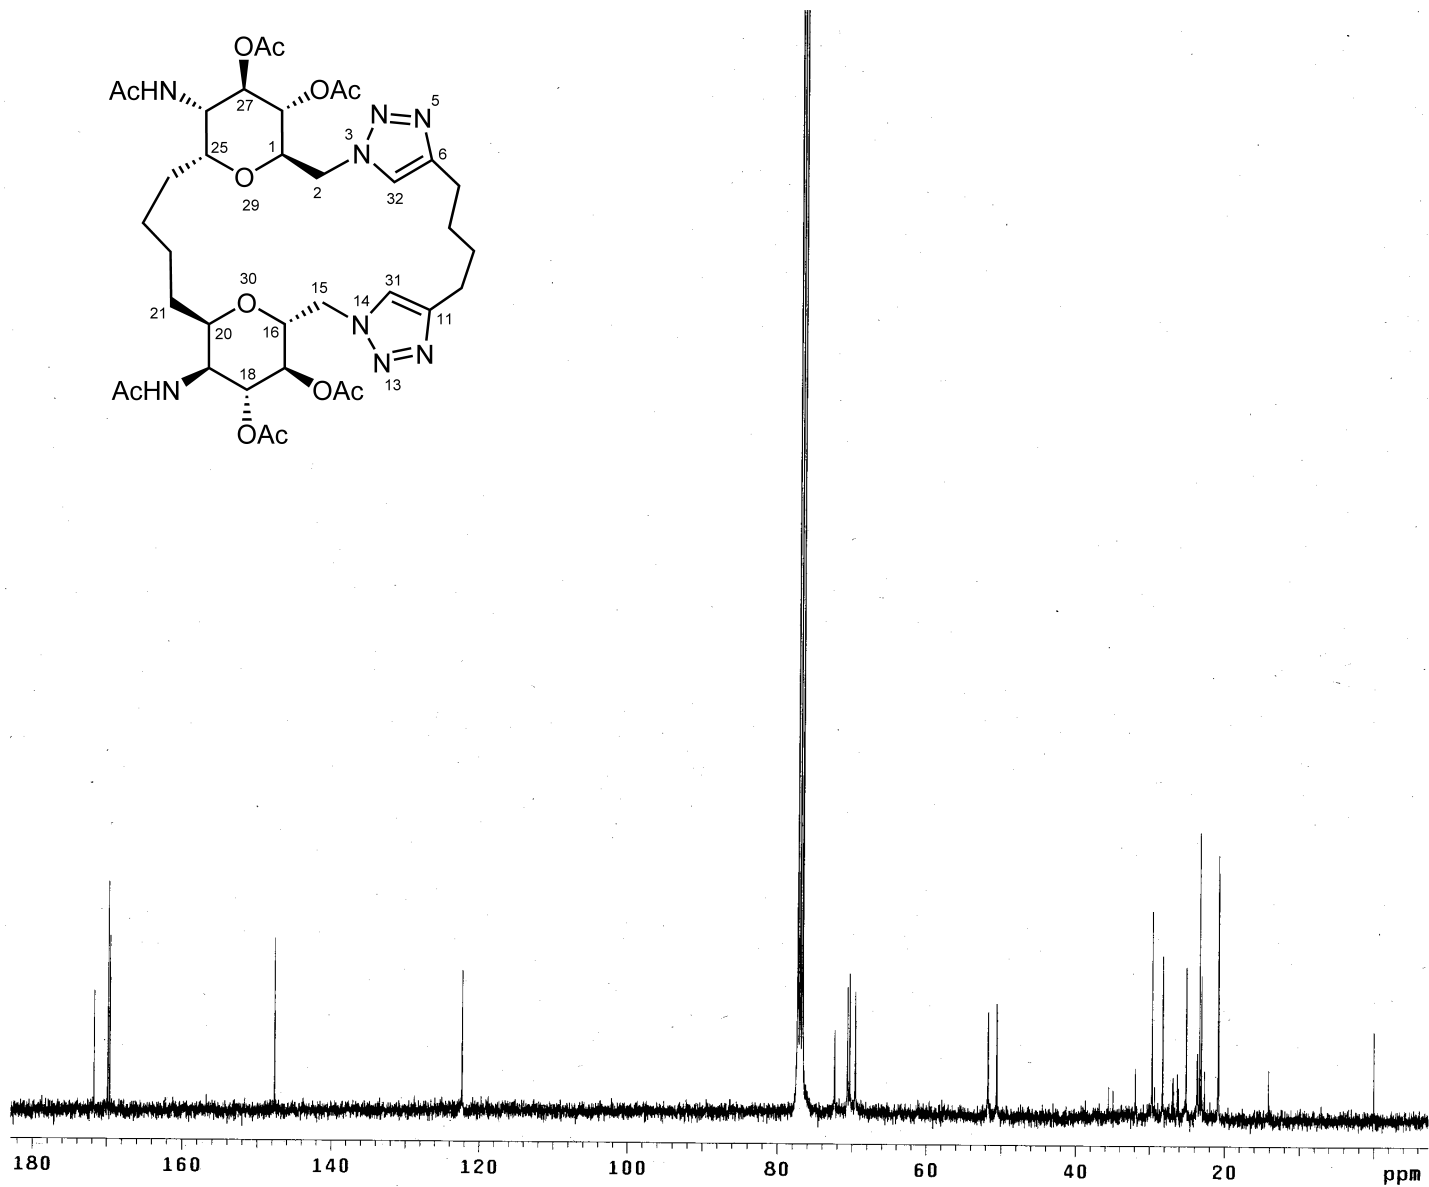

```

dos308.13C.nS.cdc13
Wed Dec 15 21:08 2004

exp3 std13c

SAMPLE
date Dec 15 2004
solvent CDC13
file exp

ACQUISITION
instrum m400
probe asw5
seqfil s2pul
sfrq 100.574
tn C13
at 1.311
np 67216
sw 25641.0
bs 16
tpwr 61
pw 4.0
d1 1.689
d2 0
tof 1327.2
nt 8000
ct 8000
alock n
gain not used
FLAGS

il n
in n
dp y
DEC. & VT

dn H1
dfrq 399.936
homo n
dpwr 40
dof 0
dm yyy
dmm w
dmf 9350
pp 17.5

PROCESSING
lb 1.00
wtfile
proc ft
fn 65536

DISPLAY
sp -746.2
wp 19140.6
vs 657
sc 65
wc 225
hzmm 85.07
rfl 9741.6
rfp 7743.4
th 20.0
rp 62.4
lp -327.8
nm no ph

```



*N,N'*-[(1*R*,16*R*,17*S*,18*R*,19*R*,20*R*,25*R*,26*R*,27*R*,28*S*)-17,18,27,28-Tetrahydroxy-29,30-dioxo-3,4,5,12,13,14-hexaazapentacyclo[23.3.1.1<sup>3,6</sup>.1<sup>11,14</sup>.1<sup>16,20</sup>]dotriaconta-4,6(32),11(31),12-tetraene-19,26-diyl]diacetamide (24)

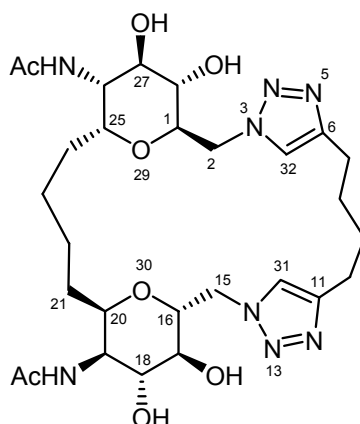

<sup>1</sup>H-NMR (400 MHz, D<sub>2</sub>O): δ [ppm] = 0.50 (bs, 4H), 1.22 (bs, 4H), 1.56 (bs, 4H), 1.93 (s, 6H, CH<sub>3</sub>(<sub>NHAc</sub>)), 2.60–2.75 (m, 4H), 3.34 (t, *J* = 8.9 Hz, 2H), 3.56–3.69 (m, 4H), 3.70–3.78 (m, 2H), 3.93 (dd, *J* = 10.7, 5.7 Hz, 2H), 4.32 (dd, *J* = 14.1, 10.5 Hz, 2H), 4.75–4.79 (m, 2H), 7.70 (s, 2H).–

<sup>13</sup>C-NMR (100 MHz, D<sub>2</sub>O): δ [ppm] = 21.97, 22.20, 24.03, 27.86 (t, C-7, C-8, C-21, C-22), 51.57 (t, C-2), 53.39 (d, C-19), 70.66, 71.70, 72.63, 73.81 (d, C-16, C-17, C-18, C-20), 123.82 (d, C-31), 148.35 (s, C-6), 174.27 (s, CO).–

|                   |                                                                  |                      |       |          |
|-------------------|------------------------------------------------------------------|----------------------|-------|----------|
| <b>HRMS (ESI)</b> | C <sub>28</sub> H <sub>44</sub> N <sub>8</sub> O <sub>8</sub> Na | [M+Na <sup>+</sup> ] | calcd | 643.3174 |
|                   |                                                                  |                      | found | 643.3159 |

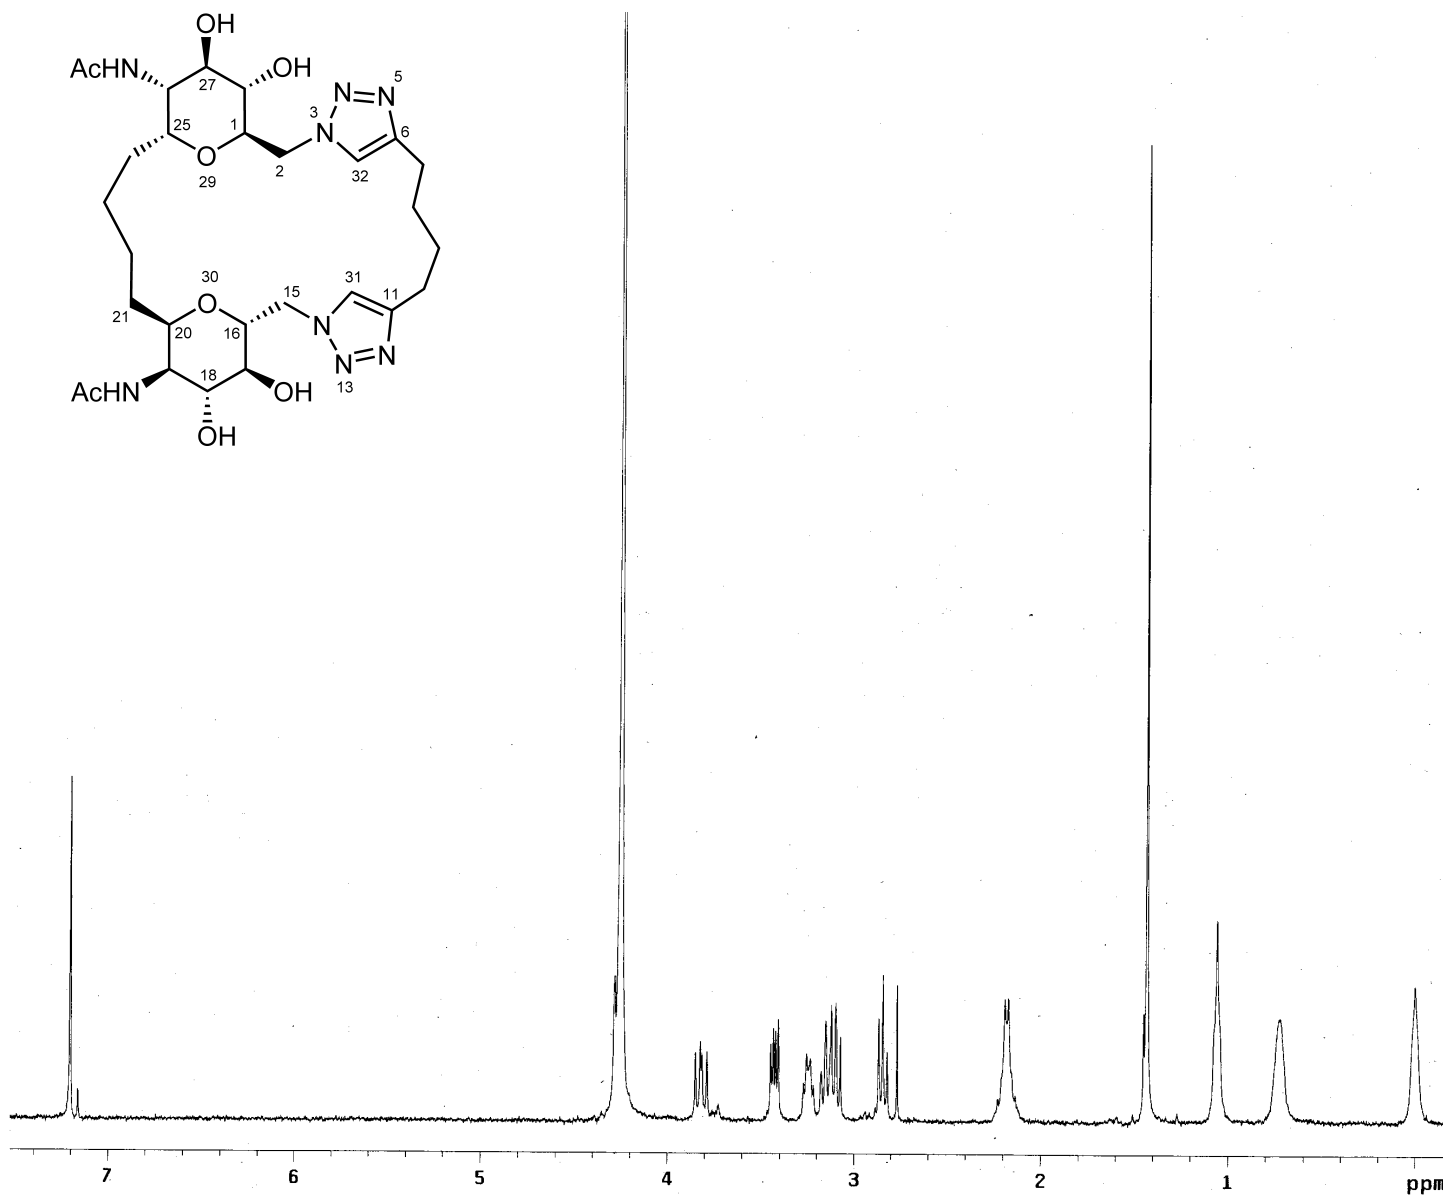

1H Standard-Parameter  
 Mon Dec 20 12:06 2004  
 exp8 std1h

SAMPLE  
 date Dec 20 2004  
 solvent D2O  
 file exp

ACQUISITION  
 instrum m400  
 probe asw5  
 seqfil s2pul  
 sfrq 399.938  
 tn H1  
 at 2.562  
 np 65536  
 sw 12787.7  
 bs 8  
 tpwr 58  
 pw 2.8  
 d1 1.000  
 d2 0  
 tof 828.3  
 nt 16  
 ct 16  
 alock n  
 gain not used

FLAGS  
 il n  
 in nw  
 dp y

DEC. & VT  
 dn H1  
 dfrq 399.937  
 homo n  
 dpwr 30  
 dof 0.0  
 dm nnn  
 dmm c  
 dmf 200

PROCESSING  
 lb 0.40  
 wtfile  
 proc ft  
 fn 65536

DISPLAY  
 sp -82.0  
 wp 3090.9  
 vs 1755  
 sc 65  
 wc 225  
 hzmm 13.74  
 rfl 3696.2  
 rfp 0  
 th 2.9  
 rp -7.5  
 lp -150.4  
 nm ph

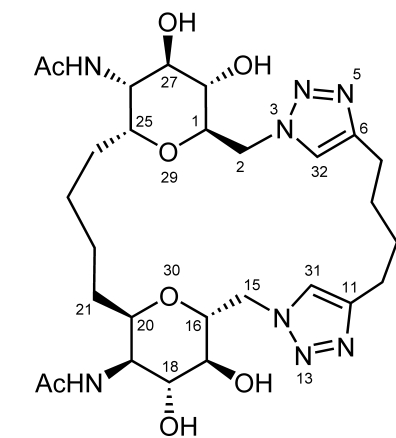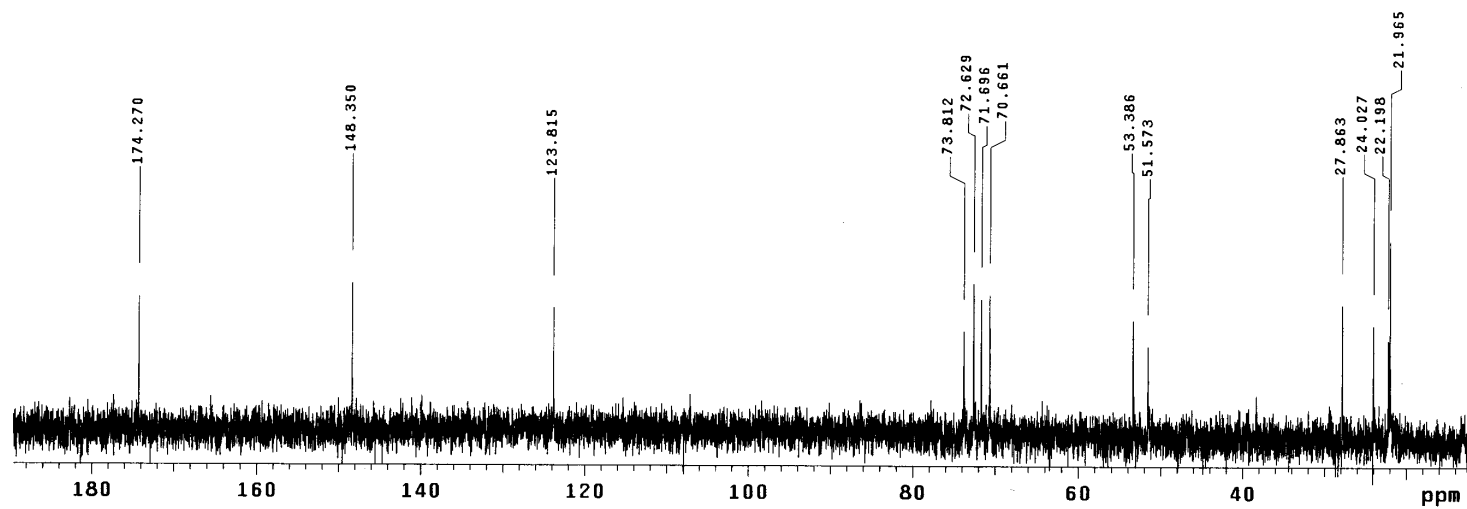

dos309.13C.d2o  
 Fri Jan 7 19:26 2005

exp3 std13c

SAMPLE  
 date Jan 7 2005  
 solvent D2O  
 file exp

ACQUISITION

instrum m400  
 probe asw5  
 seqfil s2pu1  
 sfrq 100.575  
 tn C13  
 at 1.311  
 np 67216  
 sw 25641.0  
 bs 16  
 tpwr 61  
 pw 4.0  
 d1 1.689  
 d2 0  
 tof 1327.2  
 nt 15000  
 ct 0  
 alock n  
 gain not used  
 FLAGS

PROCESSING  
 lb 1.00  
 wtfile ft  
 proc  
 fn 65536

DISPLAY  
 sp 1256.5  
 vp 17811.1  
 vs 30  
 sc 65  
 wc 225  
 hzmm 79.16  
 rfl 1970.6  
 rfp 0  
 th 10.2  
 rp 193.0  
 lp -295.0  
 nm no ph

**(3*R*,5*S*,6*R*,7*R*,8*S*,21*S*,22*R*,23*R*,24*S*,26*R*)-5,24-Dimethoxy-4,9,20,25-tetraoxa-1,28,29,30,37,38-hexaazapentacyclo[34.2.1.1<sup>28,31</sup>.0<sup>3,8</sup>.0<sup>21,26</sup>]tetraconta-29,31(40),36(39),37-tetraen-6,7,22,23-tetrol (25)**

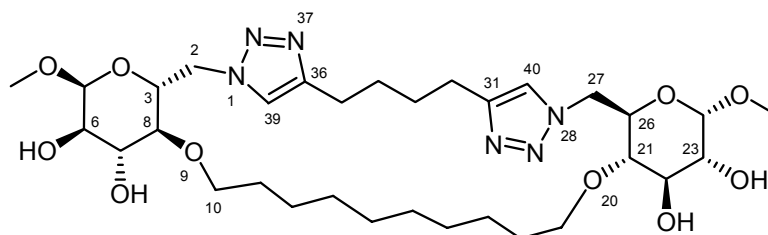

**<sup>1</sup>H-NMR** (400 MHz, CD<sub>3</sub>OD): δ [ppm] = 1.27–1.69 (m, 24H), 2.72 (bs, 4H), 2.87 (dd, *J* = 10.0, 8.8 Hz, 2H), 3.19 (s, 6H), 3.33–3.35 (m, 2H), 3.51–3.58 (m, 2H), 3.70 (dd, *J* = 9.8, 9.0 Hz, 2H), 3.68–3.92 (m, 2H), 3.97 (ddd, *J* = 9.0, 6.1, 6.1 Hz, 2H), 4.59–4.62 (m, 6H), 7.74 (s, 2H).–

**<sup>13</sup>C-NMR** (100 MHz, CD<sub>3</sub>OD): δ [ppm] = 25.64, 27.08, 29.45, 30.36, 30.43, 31.28 (t, C-11–C-14, C-37, C-38), 52.22 (t, C-2), 55.54 (q, CH<sub>3</sub>), 70.64, 73.49 (d, CH), 73.96 (t, C-10), 75.47, 80.76, 101.14 (d, CH), 124.52 (d, C-39), 148.52 (s, C-36).–

|                   |                                                                   |                      |       |          |
|-------------------|-------------------------------------------------------------------|----------------------|-------|----------|
| <b>HRMS (ESI)</b> | C <sub>32</sub> H <sub>54</sub> N <sub>6</sub> O <sub>10</sub> Na | [M+Na <sup>+</sup> ] | calcd | 705.3794 |
|                   |                                                                   |                      | found | 705.3788 |

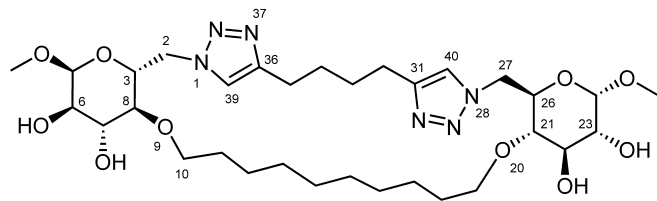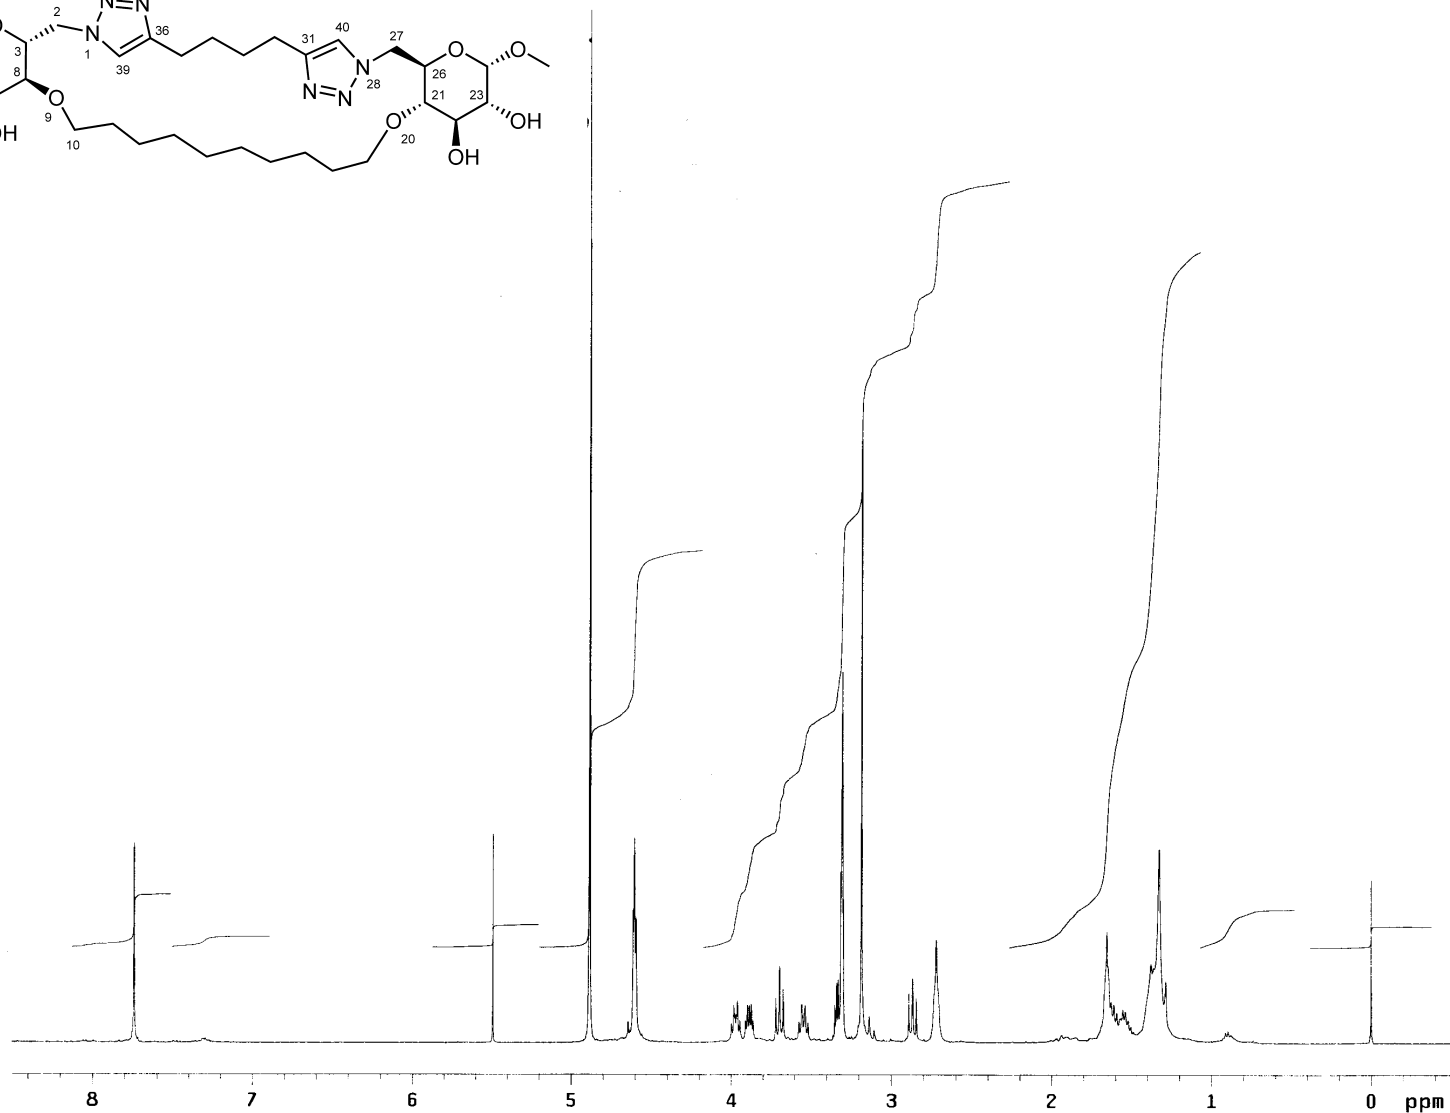

dos297.1H.meod

Thu Nov 18 14:36 2004

exp7 stdih

SAMPLE  
date Nov 18 2004  
solvent CD3OD  
file exp

ACQUISITION  
instrum m400  
probe asw5  
seqfil s2pul  
sfrq 399.939  
tn H1  
at 2.562  
np 65536  
sw 12787.7  
bs 8  
tpwr 58  
pw 2.8  
d1 1.000  
d2 0  
tof 828.3  
nt 16  
ct 16  
alock n  
gain not used

FLAGS  
il n  
in nw  
dp y  
DEC. & VT  
dn H1  
dfrq 399.938  
homo n  
dpwr 30  
dof 0.0  
dm nnn  
dmm c  
dmf 200

PROCESSING  
lb 0.40  
wtfile  
proc ft  
fn 65536

DISPLAY  
sp -200.2  
wp 3599.4  
vs 162  
sc 65  
vc 225  
hzmm 16.00  
is 948.34  
rfl 3538.9  
rfp 0  
th 2.1  
ins 100.000  
rp -2.3  
lp -172.5  
nm ph

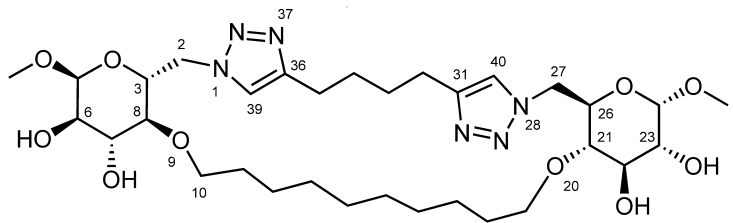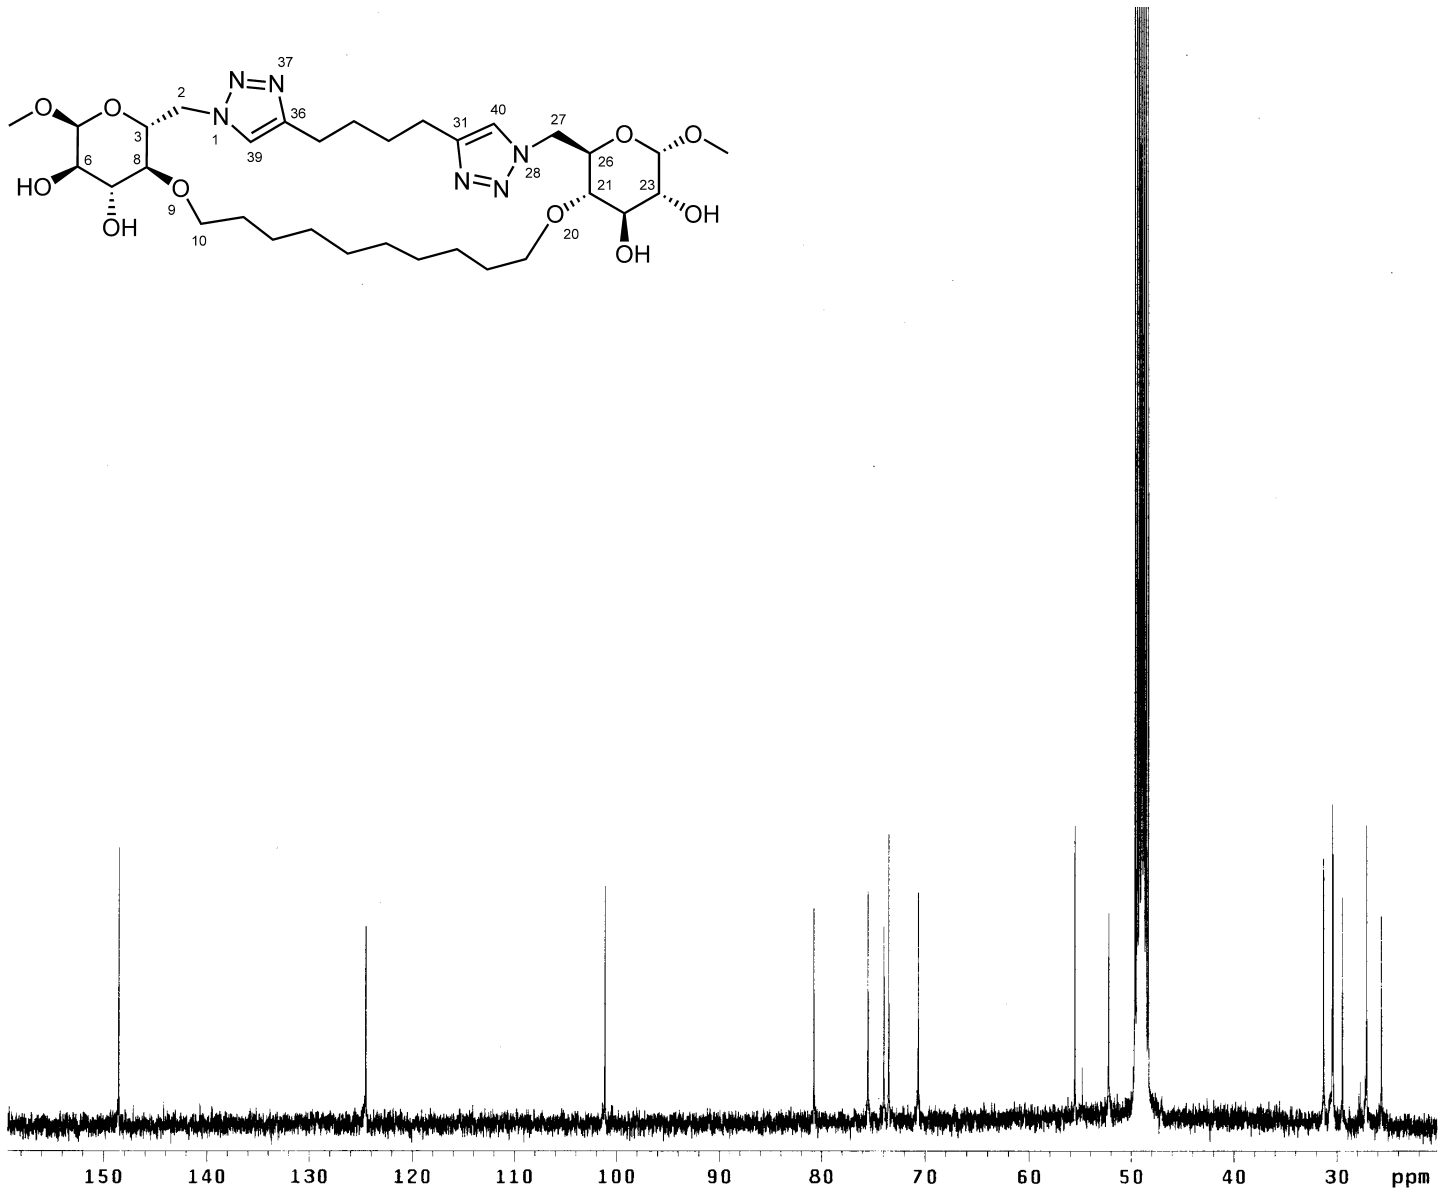

```

dos297.13C.m
Thu Nov 18 18:5
exp8 std13c

SAMPLE
date Nov 18 2004
solvent CD300
file exp

ACQUISITION
instrum m400
probe asw5
seqfil s2pul
sfrq 100.575
tn C13
at 1.311
np 67216
sw 25641.0
bs 16
tpwr 61
pw 4.0
d1 1.689
d2 0
tof 1327.2
nt 10000
ct 10000
alock n
gain not used

FLAGS
il n
in nw
dp y

DEC. & VT
dn H1
dfrq 399.938
homo n
dpwr 40
dof 0
dm yyy
dmm w
dmf 9350
pp 17.5

PROCESSING
lb 1.00
wtfile
proc ft
fn 65536

DISPLAY
sp 2033.1
wp 13985.3
vs 3533
sc 65
wc 225
hzmm 62.16
rfl 6779.0
rfp 4927.6
th 20.0
rp 186.3
lp -316.4
nm no ph

```

## Reference List

- [1.] B. Elchert, J. Li, J. H. Wang, Y. Hui, R. Rai, R. Ptak, P. Ward, J. Y. Takemoto, M. Bensaci, C. W. T. Chang, *J.Org.Chem.* **2004**, *69* 1513-1523.
- [2.] C. Rosenbohm, D. Vanden Berghe, A. Vlietinck, J. Wengel, *Tetrahedron* **2001**, *57* 6277-6287.
